# Supplementary material for: YAP regulates cell size and growth dynamics via non-cell autonomous mediators
Source: eLife journal article supplement (doi:10.7554/elife.53404), 2020-01-08
Supplement: supp [file elife_poa_e53404_Figure_1_figure_supplement_4.docx]

**
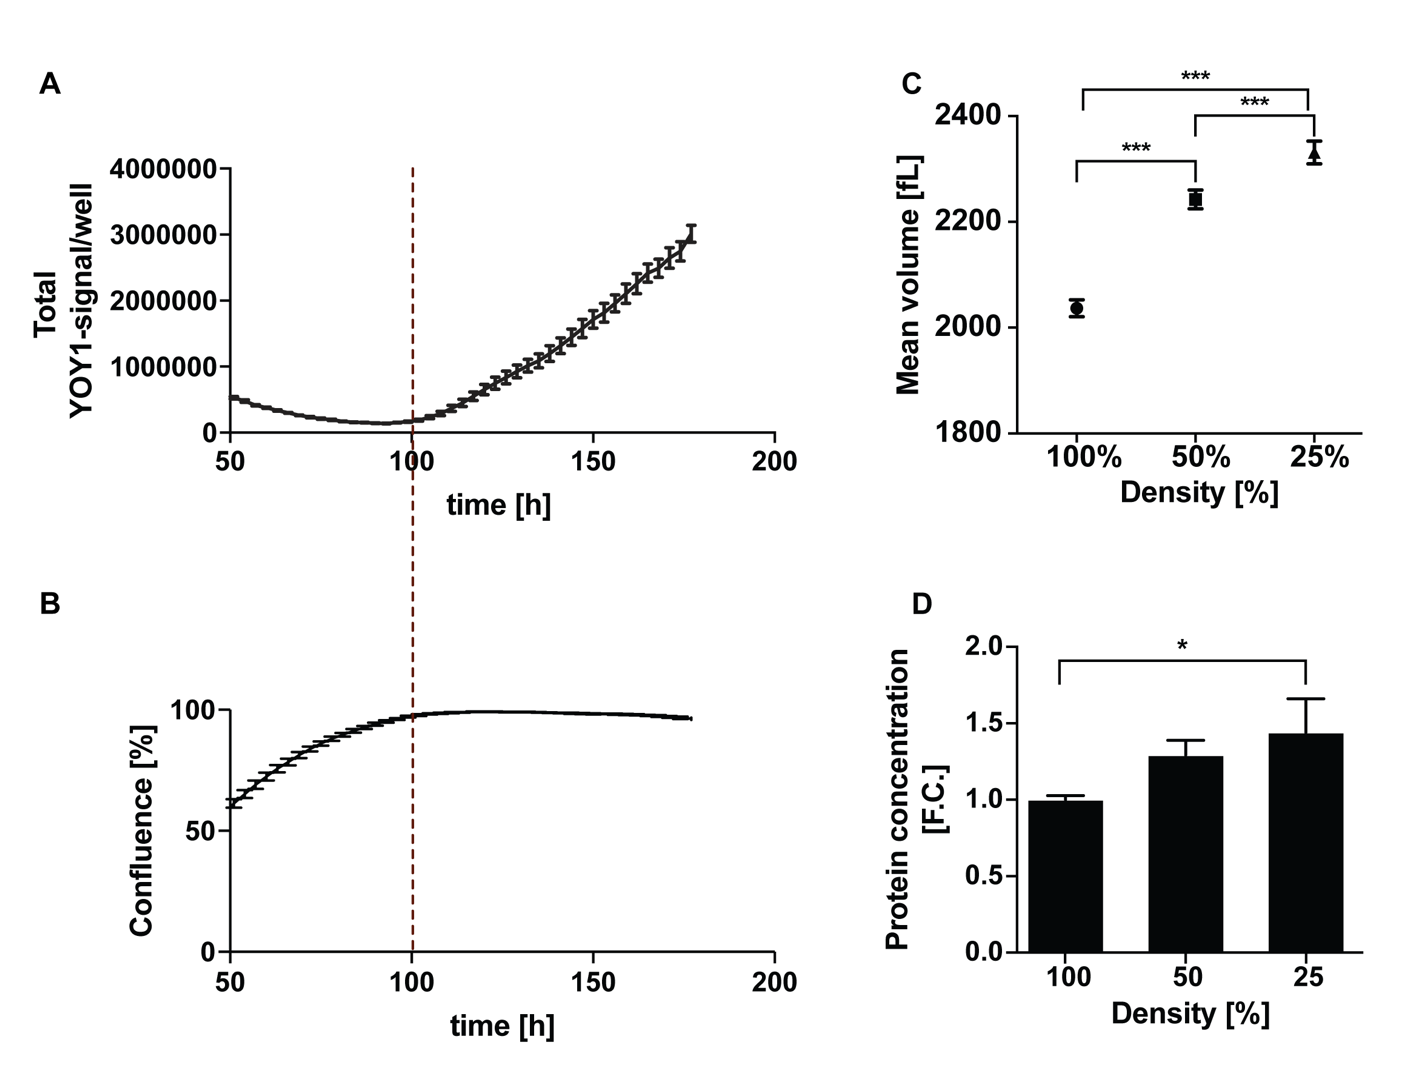
Figure 1 – Supplement 4. Culture density affects cell death rates and cell size.** (**A, B**) Cell death was monitored using 50 nM of the fluorescent DNA-binding dye YOYO-1 that permeates only dead cells. Flipin-Trex cells were seeded in the presence of YOYO-1 which becomes fluorescent when bound to DNA. The rate of accumulation of green fluorescent signal/well is an indication of cell death over time. Cell death increases significantly once cells reach 100% confluence. (**C**) Cell volume of HEK293 cells was measured using Coulter Counter. Cells were counted and seeded the night before the measurement. Cells were seeded in 10 ml medium on a 10 cm dish at ~ 10x10^6, 5x10^6 and 2.5x10^6 cells/dish to achieve 100%, 50% and 25% confluence respectively. For the measurement cells were trypsinized and resuspended in Coulter measurement buffer. Each measurement represents the average volume from 3 independent plates ± S.D. (**D**) Protein concentrations of a total of 2.5x10^6 cells per density was done using BCA. Cells were cultured as described in **C**, trypsinized, counted, pelleted, washed in PBS and lysed in RIPA buffer; n=3, mean ± S.D.
