# Supplementary material for: YAP regulates cell size and growth dynamics via non-cell autonomous mediators
Source: eLife journal article supplement (doi:10.7554/elife.53404), 2020-01-08
Supplement: supp [file elife_poa_e53404_Figure_1_figure_supplement_6.docx]

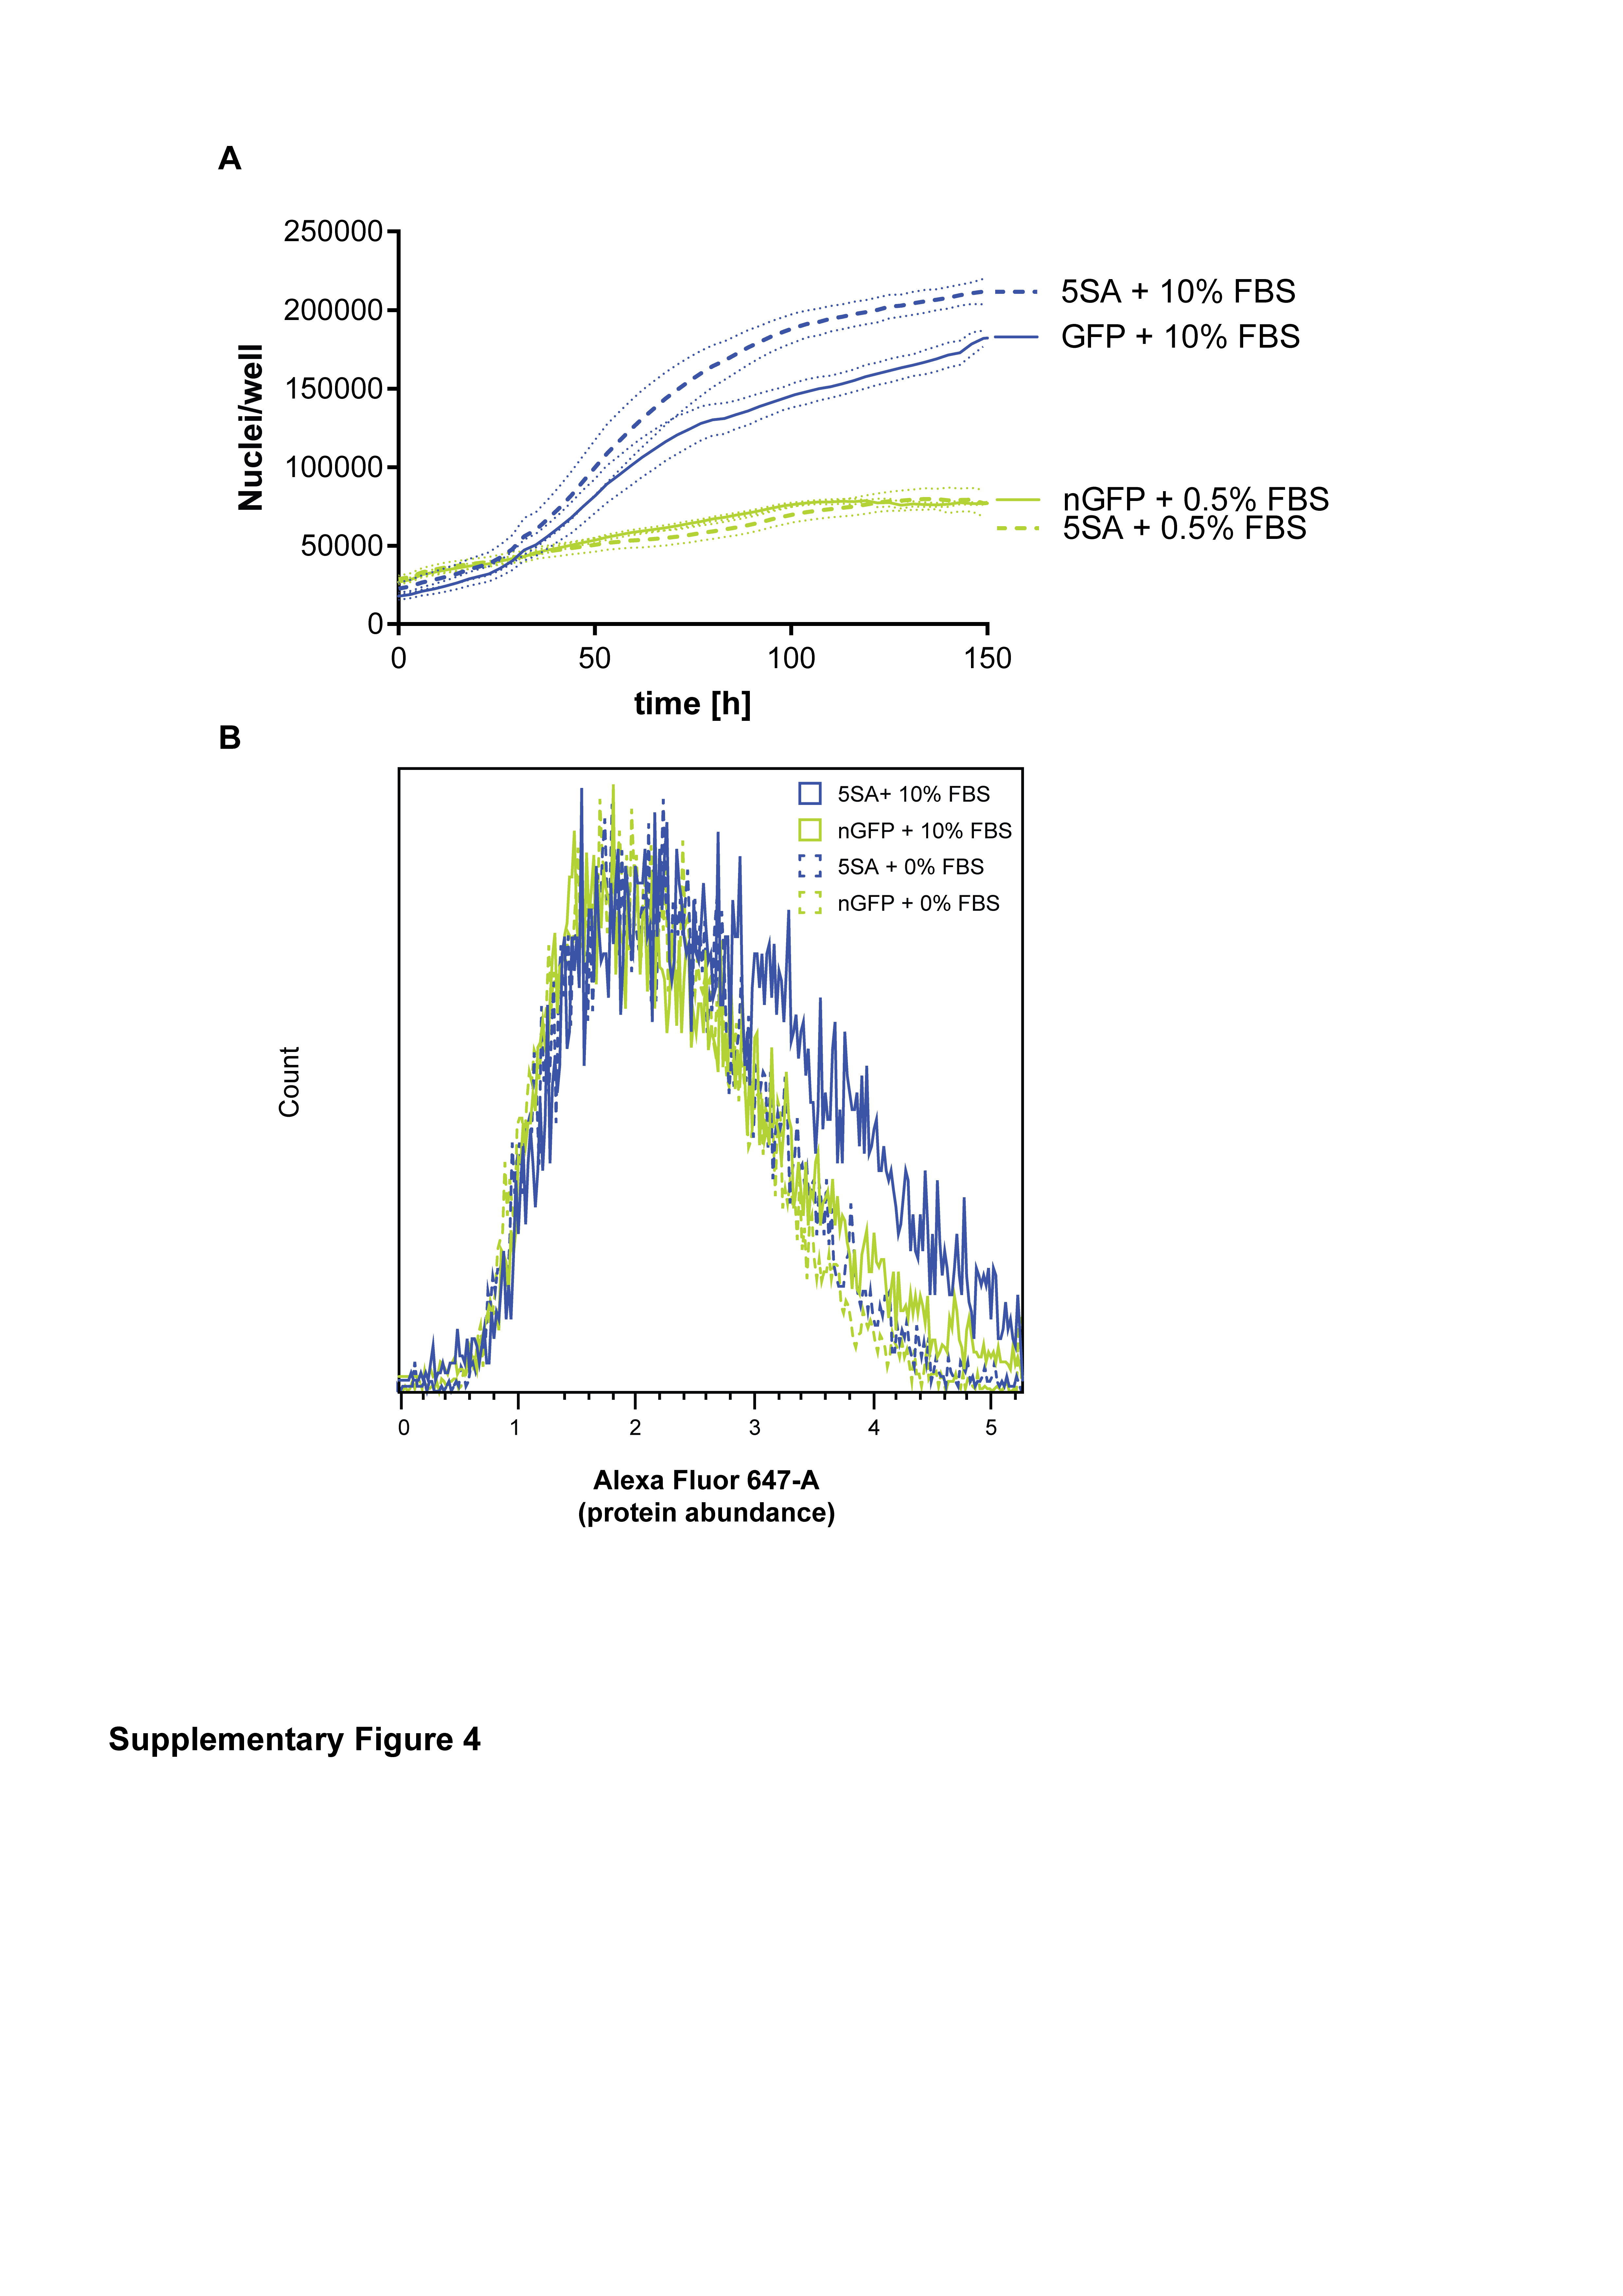


**Figure 1 – Supplement 6: Serum is required for the 5SA-dependent changes in proliferation and size.** (**A**) Population growth is reduced when cells are cultured in 0.5% serum, but with 0.2% BSA, and is comparable between Flipin-Trex-293 cells expressing nuclear GFP (nGFP) and YAP5SA (5SA) cells (n=5; mean±SEM). (**B**)Total protein content is higher in 5SA vs. nGFP controls in the presence of FBS, but not in its absence. ~ 2.5 x 10^6 cells were cultured on a 10 cm dish either in the presence of 10% FBS or with 0.5% serum and 0.2% BSA. A day later cells were simultaneously trypsinized, fixed, stained and measured on an LSRII.
