# Supplementary material for: YAP regulates cell size and growth dynamics via non-cell autonomous mediators
Source: eLife journal article supplement (doi:10.7554/elife.53404), 2020-01-08
Supplement: supp [file elife_poa_e53404_Figure_2_figure_supplement_1.docx]

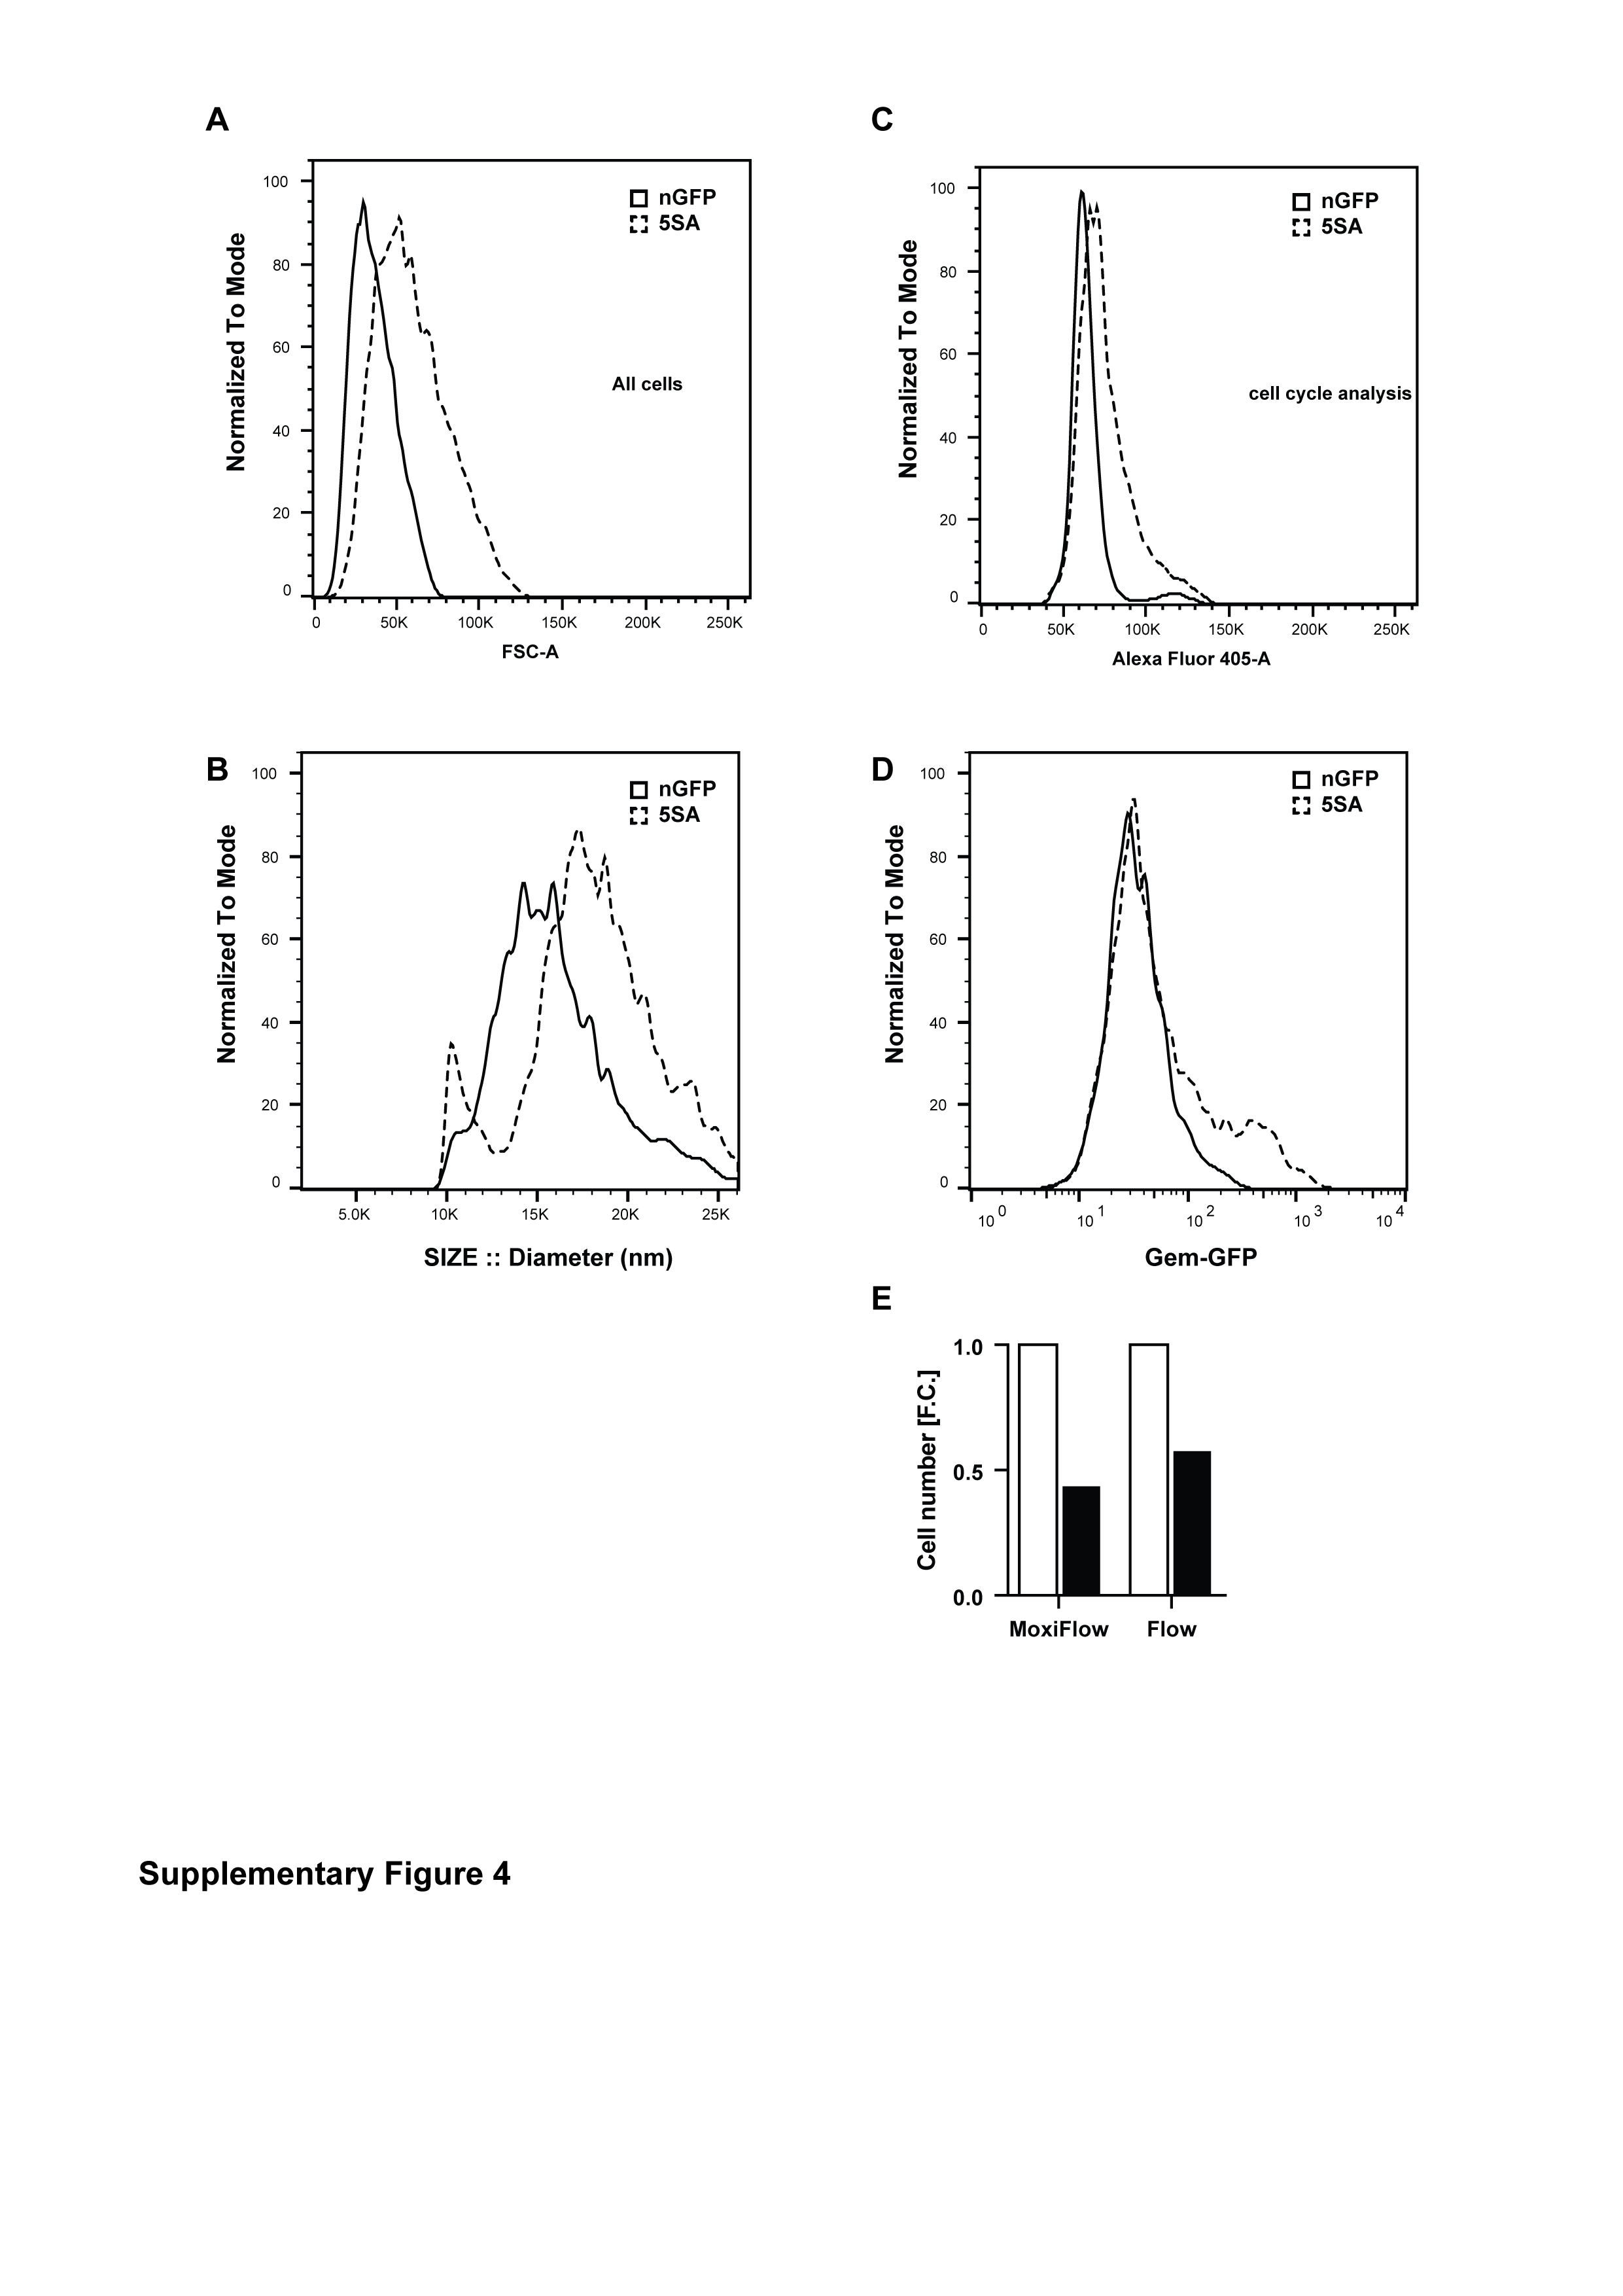


**Figure2 – Supplement 1.** **The effect of 5SA-conditioned medium on 3T3 fibroblasts.** To obtain conditioned medium Flipin-Trex cells expressing YAP5SA or nGFP were cultured in 10% FBS until they reached confluence. Thereafter, cells were switched to 0.5% FBS medium for 6 days to allow for the significant accumulation of soluble molecules in the medium in the presence of minimum amounts of FBS. The conditioned medium was then collected, concentrated on a 3000 Da cutoff centricon and resuspended in fresh medium. Meanwhile, 3T3 cells were starved in 0.5% FBS after reaching confluence for 6 days, then treated with conditioned medium for 48 hr. 3T3 cells were then trypsinized and resuspended in PBS+ 1% FBS before they were measured. 5SA-conditioned medium, vs. nGFP-conditioned medium, increases the size of 3T3 Fibroblasts as measured by changes in FSC-A distribution on a LSRII (**A**) and cell diameter on a coulter-based MoxiFlow (**B**). (**C**) The number of 3T3 fibroblasts in S and G2/M is higher when cells are treated with 5SA conditions medium. That is also reflected in an increase in the fraction of Geminin-GFP expressing cells (**D**). (**E**) The total cell number of the same cultures treated with 5SA-conditioned medium is double that of nGFP cells according to measurements done on a Moxiflow, or to the number of single-cell events counted on a flow cytometer.
