# Supplementary material for: YAP regulates cell size and growth dynamics via non-cell autonomous mediators
Source: eLife. 2020 Jan 9;9:e53404. doi: 10.7554/eLife.53404 (PMC6989120; doi:10.7554/eLife.53404)
Supplement: Supplementary file 1. [file elife-53404-supp1.xlsx]

## Sheet: all proteins
ProteinID	gene	5SA+/5SA-	log2	>2sd	source
sp|P46937-7|YAP1_HUMAN	YAP1	6.26916	2.64827	yes	lysate
sp|P29279|CTGF_HUMAN	CTGF	6.08511	2.60528	yes	exosome
sp|O75556|SG2A1_HUMAN	SCGB2A1	5.62252	2.49122	yes	exosome
sp|Q9Y2J4-4|AMOL2_HUMAN	AMOTL2	4.50276	2.17081	yes	lysate
sp|P05120|PAI2_HUMAN	SERPINB2	3.85064	1.9451	yes	lysate
sp|P78395|PRAME_HUMAN	PRAME	1.24296	0.313785	no	lysate
sp|O75367|H2AY_HUMAN	H2AFY	3.68196	1.88047	yes	lysate
sp|P46937-9|YAP1_HUMAN	YAP1	3.42478	1.77601	yes	exosome
sp|Q8WZ82|OVCA2_HUMAN	OVCA2	1.02496	0.0355734	no	lysate
sp|Q6FI13|H2A2A_HUMAN	HIST2H2AA3	3.42348	1.77546	yes	lysate
sp|Q8IUE6|H2A2B_HUMAN	HIST2H2AB	3.23939	1.69572	yes	lysate
sp|P62805|H4_HUMAN	HIST1H4A	3.20931	1.68226	yes	lysate
sp|Q8IXT5|RB12B_HUMAN	RBM12B	3.15029	1.65548	yes	lysate
sp|O00622|CYR61_HUMAN	CYR61	3.06098	1.61399	yes	exosome
sp|Q9GZZ8|LACRT_HUMAN	LACRT	3.03226	1.60039	yes	exosome
sp|P38567-2|HYALP_HUMAN	SPAM1	2.98406	1.57728	yes	exosome
sp|P68431|H31_HUMAN	HIST1H3A	2.96396	1.56753	yes	lysate
sp|Q96DR8|MUCL1_HUMAN	MUCL1	2.861	1.51652	yes	exosome
sp|P60903|S10AA_HUMAN	S100A10	2.73064	1.44924	yes	lysate
sp|Q6DN03|H2B2C_HUMAN	HIST2H2BC	2.72279	1.44509	yes	lysate
sp|Q9P0M6|H2AW_HUMAN	H2AFY2	2.6438	1.40261	yes	lysate
sp|P52926|HMGA2_HUMAN	HMGA2	2.61752	1.3882	yes	lysate
sp|Q5QNW6-2|H2B2F_HUMAN	HIST2H2BF	2.59484	1.37564	yes	lysate
sp|Q16186|ADRM1_HUMAN	ADRM1	1.07229	0.100697	no	lysate
sp|Q7Z7K6|CENPV_HUMAN	CENPV	2.53227	1.34043	yes	lysate
sp|P53539|FOSB_HUMAN	FOSB	2.48513	1.31332	yes	lysate
sp|Q15517|CDSN_HUMAN	CDSN	2.33333	1.22239	yes	exosome
sp|Q09666|AHNK_HUMAN	AHNAK	2.33129	1.22113	yes	lysate
sp|Q92804|RBP56_HUMAN	TAF15	2.26353	1.17858	yes	lysate
sp|P17096-3|HMGA1_HUMAN	HMGA1	2.25982	1.17621	yes	lysate
sp|P69905|HBA_HUMAN	HBA1	2.25982	1.17621	yes	lysate
sp|Q8WVV4-1|POF1B_HUMAN	POF1B	2.25733	1.17462	yes	exosome
sp|Q6PL18|ATAD2_HUMAN	ATAD2	2.21102	1.14471	yes	lysate
sp|P11387|TOP1_HUMAN	TOP1	2.13505	1.09427	yes	lysate
sp|Q13111|CAF1A_HUMAN	CHAF1A	2.12263	1.08586	yes	lysate
sp|P07355-2|ANXA2_HUMAN	ANXA2	2.10867	1.07633	yes	lysate
sp|O15021|MAST4_HUMAN	MAST4	2.08642	1.06103	yes	exosome
sp|P78563|RED1_HUMAN	ADARB1	2.05704	1.04057	yes	lysate
sp|P01834|IGKC_HUMAN	IGKC	2.04878	1.03477	yes	exosome
sp|Q7Z2W4-3|ZCCHV_HUMAN	ZC3HAV1	2.0069	1.00497	yes	lysate
sp|P63218|GBG5_HUMAN	GNG5	1.92643	0.945928	yes	lysate
sp|O43663|PRC1_HUMAN	PRC1	1.92398	0.944091	yes	exosome
sp|O95696-2|BRD1_HUMAN	BRD1	1.89528	0.92241	yes	lysate
sp|Q9Y5B9|SP16H_HUMAN	SUPT16H	1.89193	0.919859	yes	lysate
sp|Q08945|SSRP1_HUMAN	SSRP1	1.87562	0.907365	yes	lysate
sp|Q99549-2|MPP8_HUMAN	MPHOSPH8	1.85806	0.893799	yes	lysate
sp|P12429|ANXA3_HUMAN	ANXA3	1.85714	0.893085	yes	exosome
sp|Q8IUX8-2|EGFL6_HUMAN	EGFL6	1.849	0.886747	yes	exosome
sp|P29317|EPHA2_HUMAN	EPHA2	1.82725	0.869674	yes	lysate
sp|P12259|FA5_HUMAN	F5	1.82725	0.869674	yes	lysate
sp|P12429|ANXA3_HUMAN	ANXA3	1.82397	0.867081	yes	lysate
sp|P62760|VISL1_HUMAN	VSNL1	1.80518	0.852145	yes	lysate
sp|P68366|TBA4A_HUMAN	TUBA4A	1.80112	0.848895	yes	exosome
sp|Q71UI9|H2AV_HUMAN	H2AFV	1.79789	0.846308	yes	lysate
sp|Q9NZJ5|E2AK3_HUMAN	EIF2AK3	1.79789	0.846308	yes	lysate
sp|P07101-2|TY3H_HUMAN	TH	1.7933	0.842614	yes	exosome
sp|Q14151|SAFB2_HUMAN	SAFB2	1.78341	0.83464	yes	lysate
sp|P28347|TEAD1_HUMAN	TEAD1	1.77622	0.82881	yes	lysate
sp|Q00839-2|HNRPU_HUMAN	HNRNPU	1.76906	0.822982	yes	lysate
sp|Q9Y5P8|P2R3B_HUMAN	PPP2R3B	1.76193	0.817156	yes	lysate
sp|P08697|A2AP_HUMAN	SERPINF2	1.75483	0.811333	yes	lysate
sp|P17096-2|HMGA1_HUMAN	HMGA1	1.75483	0.811333	yes	lysate
sp|Q9UL26|RB22A_HUMAN	RAB22A	1.75482	0.811324	yes	exosome
sp|P51956|NEK3_HUMAN	NEK3	1.7248	0.786425	yes	exosome
sp|P12111|CO6A3_HUMAN	COL6A3	1.70572	0.770383	yes	exosome
sp|Q8WTP8-2|AEN_HUMAN	AEN	1.03947	0.0558547	no	lysate
sp|Q9ULG1|INO80_HUMAN	INO80	1.69601	0.762143	yes	lysate
sp|Q6RFH5|WDR74_HUMAN	WDR74	1.69286	0.759459	yes	lysate
sp|P12273|PIP_HUMAN	PIP	1.6738	0.743124	yes	exosome
tr|C9JEE0|C9JEE0_HUMAN	IGLL1	1.65957	0.730813	yes	exosome
sp|Q15424-3|SAFB1_HUMAN	SAFB	1.65866	0.730016	yes	lysate
sp|O95718|ERR2_HUMAN	ESRRB	1.65866	0.730016	yes	lysate
tr|A6NN80|A6NN80_HUMAN	#N/A	1.65201	0.724221	yes	lysate
sp|Q9NNX1|TUFT1_HUMAN	TUFT1	1.62569	0.701054	yes	lysate
sp|P60059|SC61G_HUMAN	SEC61G	1.61883	0.694954	yes	lysate
sp|P25311|ZA2G_HUMAN	AZGP1	1.6178	0.694034	yes	exosome
sp|Q6NZI2|PTRF_HUMAN	PTRF	1.61577	0.692219	yes	lysate
sp|O00479|HMGN4_HUMAN	HMGN4	1.6127	0.689479	yes	lysate
sp|P04083|ANXA1_HUMAN	ANXA1	1.60625	0.683693	yes	lysate
sp|P45973|CBX5_HUMAN	CBX5	1.60625	0.683693	yes	lysate
sp|P16220|CREB1_HUMAN	CREB1	1.60625	0.683693	yes	lysate
sp|O00159|MYO1C_HUMAN	MYO1C	1.59982	0.677908	yes	lysate
sp|Q02318|CP27A_HUMAN	CYP27A1	1.59067	0.669638	yes	exosome
sp|P05204|HMGN2_HUMAN	HMGN2	1.58704	0.666342	yes	lysate
sp|P15954|COX7C_HUMAN	COX7C	1.58704	0.666342	yes	lysate
sp|O14646|CHD1_HUMAN	CHD1	1.584	0.663576	yes	lysate
sp|Q9BYG3|MK67I_HUMAN	NIFK	1.58373	0.663327	yes	lysate
sp|Q9Y3E1|HDGR3_HUMAN	HDGFRP3	1.57766	0.657789	yes	lysate
sp|Q8N392|RHG18_HUMAN	ARHGAP18	1.57732	0.657475	yes	exosome
sp|Q9UBK8|MTRR_HUMAN	MTRR	1.57732	0.657475	yes	exosome
sp|P29762|RABP1_HUMAN	CRABP1	1.57584	0.656117	yes	exosome
sp|Q00839|HNRPU_HUMAN	HNRNPU	1.56808	0.649001	yes	lysate
sp|P11388-4|TOP2A_HUMAN	TOP2A	1.56808	0.649001	yes	lysate
sp|O00214-2|LEG8_HUMAN	LGALS8	1.56808	0.649001	yes	lysate
sp|Q8NDX6|ZN740_HUMAN	ZNF740	1.56181	0.643222	yes	lysate
sp|Q02880|TOP2B_HUMAN	MIR4442	1.55256	0.634651	yes	lysate
sp|O15213|WDR46_HUMAN	MIR6873	1.54316	0.625891	yes	lysate
sp|O95219|SNX4_HUMAN	SNX4	1.53807	0.621122	yes	exosome
sp|P19883|FST_HUMAN	FST	1.53807	0.621122	yes	exosome
sp|P83916|CBX1_HUMAN	CBX1	1.537	0.620115	yes	lysate
sp|Q9GZY8-4|MFF_HUMAN	MFF	1.537	0.620115	yes	lysate
sp|O43439-4|MTG8R_HUMAN	CBFA2T2	1.53086	0.61434	yes	lysate
sp|Q04941|PLP2_HUMAN	PLP2	1.52474	0.608566	yes	lysate
sp|Q15084-2|PDIA6_HUMAN	PDIA6	1.52162	0.605613	yes	lysate
sp|Q15717|ELAV1_HUMAN	ELAVL1	1.51865	0.602792	yes	lysate
sp|P31942|HNRH3_HUMAN	HNRNPH3	1.51865	0.602792	yes	lysate
sp|Q13887|KLF5_HUMAN	KLF5	1.51865	0.602792	yes	lysate
sp|Q15561|TEAD4_HUMAN	TEAD4	1.51865	0.602792	yes	lysate
sp|Q16643-3|DREB_HUMAN	DBN1	1.51259	0.597019	yes	lysate
sp|Q96EU7|C1GLC_HUMAN	C1GALT1C1	1.51259	0.597019	yes	lysate
sp|Q58FG1|HS904_HUMAN	HSP90AA4P	1.51259	0.597019	yes	lysate
sp|P02647|APOA1_HUMAN	APOA1	1.51256	0.596995	yes	exosome
sp|P02748|CO9_HUMAN	C9	1.50627	0.590976	yes	exosome
sp|P33981|TTK_HUMAN	TTK	1.50627	0.590976	yes	exosome
sp|P07910-2|HNRPC_HUMAN	HNRNPC	1.50053	0.585473	yes	lysate
sp|Q96EY1|DNJA3_HUMAN	DNAJA3	1.5	0.584963	yes	exosome
sp|P30566|PUR8_HUMAN	ADSL	1.5	0.584963	yes	exosome
sp|Q96FF9|CDCA5_HUMAN	CDCA5	1.49749	0.582544	yes	lysate
sp|Q9ULD4|BRPF3_HUMAN	BRPF3	1.49749	0.582544	yes	lysate
sp|Q96MU7|YTDC1_HUMAN	YTHDC1	1.49454	0.579701	yes	lysate
sp|P02656|APOC3_HUMAN	APOC3	1.49377	0.578954	yes	exosome
sp|Q9H9Y2|RPF1_HUMAN	RPF1	1.49159	0.576853	yes	lysate
sp|Q92954|PRG4_HUMAN	PRG4	1.48756	0.57295	yes	exosome
sp|Q8NI35|INADL_HUMAN	PATJ	1.48263	0.568158	yes	lysate
sp|P05114|HMGN1_HUMAN	HMGN1	1.48263	0.568158	yes	lysate
sp|Q9UIS9-9|MBD1_HUMAN	MBD1	1.48263	0.568158	yes	lysate
sp|Q9H9C1|SPE39_HUMAN	VIPAS39	1.48139	0.566951	yes	exosome
sp|Q05397-5|FAK1_HUMAN	PTK2	1.48139	0.566951	yes	exosome
sp|Q9UKM9|RALY_HUMAN	RALY	1.47969	0.565298	yes	lysate
sp|Q9HBI1-2|PARVB_HUMAN	PARVB	1.47772	0.563376	yes	exosome
sp|Q15139|KPCD1_HUMAN	PRKD1	1.47525	0.560957	yes	exosome
sp|Q16473|TENXA_HUMAN	TNXA	1.47525	0.560957	yes	exosome
sp|P01031|CO5_HUMAN	C5	1.47525	0.560957	yes	exosome
sp|Q5TCZ1|SPD2A_HUMAN	SH3PXD2A	1.47374	0.559481	yes	lysate
sp|P13987|CD59_HUMAN	CD59	1.47374	0.559481	yes	lysate
sp|O94916-5|NFAT5_HUMAN	NFAT5	1.47081	0.556616	yes	lysate
sp|Q01740|FMO1_HUMAN	FMO1	1.46914	0.554968	yes	exosome
sp|P02790|HEMO_HUMAN	HPX	1.46798	0.553833	yes	exosome
sp|Q8IVF2|AHNK2_HUMAN	AHNAK2	1.46786	0.553716	yes	lysate
sp|Q03060|CREM_HUMAN	CREM	1.46494	0.550845	yes	lysate
sp|Q9Y4E1-4|FA21C_HUMAN	FAM21C	1.46059	0.546552	yes	exosome
sp|Q9NZU5|LMCD1_HUMAN	LMCD1	1.4591	0.545074	yes	lysate
sp|Q07617|SPAG1_HUMAN	SPAG1	1.45907	0.545051	yes	lysate
sp|P03952|KLKB1_HUMAN	KLKB1	1.457	0.543003	yes	exosome
sp|Q14192|FHL2_HUMAN	FHL2	1.45618	0.542186	yes	lysate
sp|Q9P2R3-4|ANFY1_HUMAN	ANKFY1	1.45567	0.541678	yes	exosome
sp|Q9Y366|IFT52_HUMAN	IFT52	1.45098	0.537028	yes	exosome
sp|P30154-2|2AAB_HUMAN	PPP2R1B	1.45098	0.537028	yes	exosome
sp|P31949|S10AB_HUMAN	S100A11	1.45037	0.536421	yes	lysate
sp|Q01831|XPC_HUMAN	XPC	1.45036	0.536415	yes	lysate
sp|Q5VYK3|ECM29_HUMAN	ECM29	1.44853	0.534589	yes	exosome
sp|O94875-11|SRBS2_HUMAN	SORBS2	1.44747	0.533532	yes	lysate
sp|Q6P179|ERAP2_HUMAN	ERAP2	1.44499	0.531057	yes	exosome
sp|Q1KMD3|HNRL2_HUMAN	HNRNPUL2	1.44169	0.527762	yes	lysate
sp|Q9Y4K1|AIM1_HUMAN	AIM1	1.44169	0.527762	yes	lysate
sp|P42224|STAT1_HUMAN	STAT1	1.43902	0.525091	yes	exosome
sp|P01023|A2MG_HUMAN	A2M	1.43902	0.525091	yes	exosome
sp|P30414|NKTR_HUMAN	NKTR	1.43594	0.521991	yes	lysate
sp|P16403|H12_HUMAN	HIST1H1C	1.4302	0.51622	yes	lysate
sp|Q99439|CNN2_HUMAN	CNN2	1.42449	0.510448	yes	lysate
sp|O43731|ERD23_HUMAN	KDELR3	1.42449	0.510448	yes	lysate
sp|Q9NWQ8|PHAG1_HUMAN	PAG1	1.41615	0.501978	yes	lysate
sp|Q14676|MDC1_HUMAN	MDC1	1.41601	0.501828	yes	lysate
sp|P80723|BASP1_HUMAN	BASP1	1.41314	0.498905	yes	lysate
sp|Q9P2M7|CING_HUMAN	CGN	1.41314	0.498905	yes	lysate
sp|Q13795|ARFRP_HUMAN	ARFRP1	1.41314	0.498905	yes	lysate
sp|Q92481-2|AP2B_HUMAN	TFAP2B	1.41314	0.498905	yes	lysate
sp|Q6ZW31|SYDE1_HUMAN	SYDE1	1.4075	0.493133	yes	lysate
sp|Q5BKZ1|ZN326_HUMAN	ZNF326	1.4075	0.493133	yes	lysate
sp|Q92966|SNPC3_HUMAN	SNAPC3	1.4075	0.493133	yes	lysate
sp|P18846|ATF1_HUMAN	ATF1	1.4075	0.493133	yes	lysate
sp|Q9P1Z2|CACO1_HUMAN	CALCOCO1	1.4075	0.493133	yes	lysate
sp|P07305|H10_HUMAN	H1F0	1.40473	0.490296	yes	lysate
sp|Q13185|CBX3_HUMAN	CBX3	1.40464	0.490198	yes	lysate
sp|Q5T5X7|BEND3_HUMAN	BEND3	1.40188	0.487361	yes	lysate
sp|Q9ULL8|SHRM4_HUMAN	SHROOM4	1.39628	0.481588	yes	lysate
sp|Q9UHA3|RLP24_HUMAN	RSL24D1	1.39628	0.481588	yes	lysate
sp|Q96SB8-2|SMC6_HUMAN	SMC6	1.3907	0.475814	yes	lysate
sp|P22626|ROA2_HUMAN	HNRNPA2B1	1.38799	0.472994	yes	lysate
sp|Q8IVL5|P3H2_HUMAN	P3H2	1.38515	0.470041	yes	lysate
sp|Q15154|PCM1_HUMAN	PCM1	1.0567	0.0795601	no	lysate
sp|P51991|ROA3_HUMAN	HNRNPA3	1.37962	0.464266	yes	lysate
sp|Q15417|CNN3_HUMAN	CNN3	1.37962	0.464266	yes	lysate
sp|O14979|HNRDL_HUMAN	HNRNPDL	1.37962	0.464266	yes	lysate
sp|P20810-6|ICAL_HUMAN	CAST	1.05419	0.0761292	no	lysate
sp|Q9NX04|CA109_HUMAN	C1orf109	1.3741	0.458491	yes	lysate
sp|Q6AWC2-6|WWC2_HUMAN	WWC2	1.3741	0.458491	yes	lysate
sp|O14647|CHD2_HUMAN	CHD2	1.37144	0.455687	yes	lysate
sp|P31270|HXA11_HUMAN	HOXA11	1.36959	0.453743	yes	lysate
sp|Q9NSV4|DIAP3_HUMAN	DIAPH3	1.36861	0.452715	yes	lysate
sp|Q9NV06|DCA13_HUMAN	DCAF13	1.36861	0.452715	yes	lysate
sp|Q8N567|ZCHC9_HUMAN	ZCCHC9	1.36861	0.452715	yes	lysate
sp|P09493-4|TPM1_HUMAN	TPM1	1.36596	0.449917	yes	lysate
sp|P0CG12|CTF8A_HUMAN	CHTF8	1.36315	0.446939	yes	lysate
sp|Q01650|LAT1_HUMAN	SLC7A5	1.36315	0.446939	yes	lysate
sp|O60423-1|AT8B3_HUMAN	ATP8B3	1.36315	0.446939	yes	lysate
sp|P35637|FUS_HUMAN	FUS	1.3577	0.441162	yes	lysate
tr|H0YH80|H0YH80_HUMAN	#N/A	1.35489	0.438172	yes	lysate
sp|O43707|ACTN4_HUMAN	ACTN4	1.35227	0.435384	yes	lysate
sp|Q99986|VRK1_HUMAN	VRK1	1.35227	0.435384	yes	lysate
sp|Q5T2D3|OTUD3_HUMAN	OTUD3	1.35227	0.435384	yes	lysate
sp|Q9UNL4|ING4_HUMAN	ING4	1.35227	0.435384	yes	lysate
sp|Q8NDC0|MISSL_HUMAN	MAPK1IP1L	1.35227	0.435384	yes	lysate
sp|P21333|FLNA_HUMAN	FLNA	1.34967	0.432602	yes	lysate
sp|P09874|PARP1_HUMAN	PARP1	1.34967	0.432602	yes	lysate
sp|O00458|IFRD1_HUMAN	IFRD1	1.34428	0.426828	yes	lysate
sp|Q15434|RBMS2_HUMAN	RBMS2	1.34169	0.424057	yes	lysate
sp|P49711|CTCF_HUMAN	CTCF	1.34148	0.423826	yes	lysate
sp|Q9UDY4|DNJB4_HUMAN	DNAJB4	1.34148	0.423826	yes	lysate
sp|Q96D09|GASP2_HUMAN	GPRASP2	1.34148	0.423826	yes	lysate
tr|J3QSV6|J3QSV6_HUMAN	#N/A	1.34148	0.423826	yes	lysate
sp|Q5QJE6|TDIF2_HUMAN	DNTTIP2	1.33612	0.418045	yes	lysate
sp|Q14137|BOP1_HUMAN	BOP1	1.33612	0.418045	yes	lysate
tr|H3BQF6|H3BQF6_HUMAN	#N/A	1.33612	0.418045	yes	lysate
sp|P14866|HNRPL_HUMAN	HNRNPL	1.33356	0.415279	yes	lysate
sp|P10412|H14_HUMAN	HIST1H1E	1.33077	0.412264	yes	lysate
sp|O60264|SMCA5_HUMAN	SMARCA5	1.33077	0.412264	yes	lysate
sp|Q9BRQ8|AIFM2_HUMAN	AIFM2	1.06791	0.0947961	no	lysate
sp|Q9H0A0|NAT10_HUMAN	NAT10	1.28359	0.360179	no	lysate
sp|Q15654|TRIP6_HUMAN	MIR6875	1.28359	0.360179	no	lysate
sp|O75352|MPU1_HUMAN	MPDU1	1.28359	0.360179	no	lysate
sp|O00566|MPP10_HUMAN	MPHOSPH10	1.28359	0.360179	no	lysate
sp|Q8IY18|SMC5_HUMAN	SMC5	1.28359	0.360179	no	lysate
sp|Q9UBI6|GBG12_HUMAN	GNG12	1.28359	0.360179	no	lysate
sp|P49715|CEBPA_HUMAN	CEBPA	1.28359	0.360179	no	lysate
sp|Q15050|RRS1_HUMAN	RRS1	1.27844	0.354385	no	lysate
sp|Q9Y3A2|UTP11_HUMAN	UTP11	1.27844	0.354385	no	lysate
sp|P09038|FGF2_HUMAN	FGF2	1.27844	0.354385	no	lysate
sp|Q9NY12|GAR1_HUMAN	GAR1	1.27844	0.354385	no	lysate
sp|P15151|PVR_HUMAN	PVR	1.27811	0.354014	no	lysate
sp|P02649|APOE_HUMAN	APOE	1.27637	0.352051	no	lysate
sp|Q9UPU9|SMAG1_HUMAN	SAMD4A	1.27571	0.351299	no	lysate
sp|Q14315|FLNC_HUMAN	FLNC	1.27332	0.34859	no	lysate
sp|Q9UIG0|BAZ1B_HUMAN	BAZ1B	1.27332	0.34859	no	lysate
sp|Q8WWI1-3|LMO7_HUMAN	LMO7	1.27332	0.34859	no	lysate
sp|Q8N653|LZTR1_HUMAN	LZTR1	1.27332	0.34859	no	lysate
sp|O14639|ABLM1_HUMAN	ABLIM1	1.26821	0.342793	no	lysate
sp|Q14919-2|NC2A_HUMAN	DRAP1	1.26821	0.342793	no	lysate
sp|P38159|RBMX_HUMAN	RBMX	1.26821	0.342793	no	lysate
sp|Q99729-3|ROAA_HUMAN	HNRNPAB	1.26821	0.342793	no	lysate
sp|O75525|KHDR3_HUMAN	KHDRBS3	1.26821	0.342793	no	lysate
sp|P02042|HBD_HUMAN	HBD	1.26821	0.342793	no	lysate
sp|Q15121|PEA15_HUMAN	PEA15	1.26584	0.340094	no	lysate
sp|Q12766|HMGX3_HUMAN	HMGXB3	1.26584	0.340094	no	lysate
sp|Q9Y5J7|TIM9_HUMAN	TIMM9	1.26584	0.340094	no	lysate
sp|O60831|PRAF2_HUMAN	PRAF2	1.26584	0.340094	no	lysate
sp|Q96PK6|RBM14_HUMAN	RBM14	1.26312	0.336995	no	lysate
sp|P54289-3|CA2D1_HUMAN	CACNA2D1	1.26312	0.336995	no	lysate
tr|E9PN89|E9PN89_HUMAN	#N/A	1.26312	0.336995	no	lysate
sp|P06396|GELS_HUMAN	ENSG00000283430	1.26077	0.334301	no	lysate
sp|P08174-7|DAF_HUMAN	CD55	1.26041	0.333889	no	lysate
sp|O43670-2|ZN207_HUMAN	MIR632	1.26041	0.333889	no	lysate
sp|A1L390|PKHG3_HUMAN	PLEKHG3	1.2595	0.332852	no	lysate
sp|Q9Y6U3|ADSV_HUMAN	SCIN	1.25805	0.331195	no	lysate
sp|P04183|KITH_HUMAN	TK1	1.25805	0.331195	no	lysate
sp|Q587I9|SFT2C_HUMAN	SFT2D3	1.25805	0.331195	no	lysate
sp|Q96JA3|PKHA8_HUMAN	PLEKHA8	1.25805	0.331195	no	lysate
sp|Q9P0R6|GSKIP_HUMAN	GSKIP	1.25805	0.331195	no	lysate
sp|Q8TEB1|DCA11_HUMAN	DCAF11	1.25732	0.330356	no	lysate
sp|O94915|FRYL_HUMAN	FRYL	1.25534	0.328082	no	lysate
sp|Q15942|ZYX_HUMAN	ZYX	1.25534	0.328082	no	lysate
sp|Q14699|RFTN1_HUMAN	RFTN1	1.25338	0.325822	no	lysate
sp|Q9NWH9|SLTM_HUMAN	SLTM	1.25301	0.325393	no	lysate
sp|Q92613|JADE3_HUMAN	JADE3	1.25301	0.325393	no	lysate
sp|Q92536|YLAT2_HUMAN	SLC7A6	1.25301	0.325393	no	lysate
sp|Q8NBZ0|IN80E_HUMAN	INO80E	1.25301	0.325393	no	lysate
sp|Q2KHM9|K0753_HUMAN	KIAA0753	1.25263	0.324963	no	lysate
sp|Q9NR56-5|MBNL1_HUMAN	MBNL1	1.25068	0.322709	no	lysate
sp|Q13151|ROA0_HUMAN	HNRNPA0	1.25068	0.322709	no	lysate
sp|Q6P4R8-2|NFRKB_HUMAN	NFRKB	1.2503	0.322274	no	lysate
sp|Q9P2N2|RHG28_HUMAN	ARHGAP28	1.24874	0.320469	no	lysate
sp|O76021|RL1D1_HUMAN	RSL1D1	1.24798	0.31959	no	lysate
sp|P08133|ANXA6_HUMAN	ANXA6	1.24798	0.31959	no	lysate
sp|Q07157-2|ZO1_HUMAN	TJP1	1.24798	0.31959	no	lysate
sp|Q96M94|KLH15_HUMAN	KLHL15	1.24798	0.31959	no	lysate
sp|Q6PIU2-2|NCEH1_HUMAN	NCEH1	1.24798	0.31959	no	lysate
sp|Q8IY81|SPB1_HUMAN	FTSJ3	1.24566	0.316911	no	lysate
sp|P46013|KI67_HUMAN	MKI67	1.24296	0.313785	no	lysate
sp|P08195-4|4F2_HUMAN	SLC3A2	1.24296	0.313785	no	lysate
sp|Q9BUJ2|HNRL1_HUMAN	HNRNPUL1	1.24296	0.313785	no	lysate
sp|P50579|MAP2_HUMAN	METAP2	1.24296	0.313785	no	lysate
sp|Q6DKJ4|NXN_HUMAN	NXN	1.24296	0.313785	no	lysate
sp|Q9C005|DPY30_HUMAN	DPY30	1.24296	0.313785	no	lysate
sp|Q96AQ6|PBIP1_HUMAN	PBXIP1	1.24296	0.313785	no	lysate
sp|O43715|TRIA1_HUMAN	TRIAP1	1.24296	0.313785	no	lysate
sp|Q15642|CIP4_HUMAN	TRIP10	1.24296	0.313785	no	lysate
sp|Q92485|ASM3B_HUMAN	SMPDL3B	1.24296	0.313785	no	lysate
sp|P30740|ILEU_HUMAN	SERPINB1	1.05237	0.0736396	no	lysate
sp|Q9UBK7-3|RBL2A_HUMAN	RABL2A	1.24257	0.313331	no	lysate
sp|Q6ZSJ8|CA122_HUMAN	C1orf122	1.24066	0.311111	no	lysate
sp|P47928|ID4_HUMAN	ID4	1.24066	0.311111	no	lysate
sp|P12814-3|ACTN1_HUMAN	ACTN1	1.24027	0.310652	no	lysate
sp|Q9H1E3|NUCKS_HUMAN	NUCKS1	1.24027	0.310652	no	lysate
sp|Q17RY0|CPEB4_HUMAN	CPEB4	1.24027	0.310652	no	lysate
sp|Q9UKB1|FBW1B_HUMAN	FBXW11	1.23797	0.307978	no	lysate
sp|Q9Y3X0|CCDC9_HUMAN	CCDC9	1.23797	0.307978	no	lysate
sp|Q96DX7|TRI44_HUMAN	TRIM44	1.23797	0.307978	no	lysate
sp|Q9NUW8|TYDP1_HUMAN	TDP1	1.23568	0.305308	no	lysate
sp|Q92581-2|SL9A6_HUMAN	SLC9A6	1.23528	0.304838	no	lysate
sp|O75955|FLOT1_HUMAN	FLOT1	1.233	0.302169	no	lysate
sp|Q15061|WDR43_HUMAN	WDR43	1.233	0.302169	no	lysate
sp|O96028|NSD2_HUMAN	WHSC1	1.233	0.302169	no	lysate
sp|Q8NEM2|SHCBP_HUMAN	SHCBP1	1.233	0.302169	no	lysate
sp|P27105|STOM_HUMAN	STOM	1.233	0.302169	no	lysate
sp|Q6STE5|SMRD3_HUMAN	SMARCD3	1.233	0.302169	no	lysate
sp|Q02930|CREB5_HUMAN	CREB5	1.233	0.302169	no	lysate
sp|Q9UHN6|TMEM2_HUMAN	TMEM2	1.23072	0.299504	no	lysate
sp|Q05682-3|CALD1_HUMAN	CALD1	1.23072	0.299504	no	lysate
sp|Q8TAE6|PP14C_HUMAN	PPP1R14C	1.2299	0.298538	no	lysate
sp|Q9NVD7|PARVA_HUMAN	PARVA	1.22804	0.296358	no	lysate
sp|P18754-2|RCC1_HUMAN	RCC1	1.22804	0.296358	no	lysate
sp|Q6NSJ2|PHLB3_HUMAN	PHLDB3	1.22804	0.296358	no	lysate
sp|Q8N184|ZN567_HUMAN	ZNF567	1.22804	0.296358	no	lysate
sp|Q6SJ93|F111B_HUMAN	FAM111B	1.22804	0.296358	no	lysate
sp|Q9UJY1|HSPB8_HUMAN	HSPB8	1.22804	0.296358	no	lysate
tr|F8VZX2|F8VZX2_HUMAN	#N/A	1.22804	0.296358	no	lysate
sp|Q5JTW2-2|CEP78_HUMAN	CEP78	1.22661	0.294681	no	lysate
sp|Q8N6Q8|MET25_HUMAN	METTL25	1.2262	0.294191	no	lysate
sp|Q13242|SRSF9_HUMAN	SRSF9	1.22578	0.293699	no	lysate
sp|P21397|AOFA_HUMAN	MAOA	1.22578	0.293699	no	lysate
sp|Q9BZ95|NSD3_HUMAN	WHSC1L1	1.22578	0.293699	no	lysate
sp|Q9Y221|NIP7_HUMAN	NIP7	1.22536	0.293204	no	lysate
sp|Q9H9F9|ARP5_HUMAN	ACTR5	1.22353	0.291044	no	lysate
sp|Q86V48|LUZP1_HUMAN	LUZP1	1.2231	0.290545	no	lysate
sp|Q96T88-2|UHRF1_HUMAN	UHRF1	1.2231	0.290545	no	lysate
sp|Q15392|DHC24_HUMAN	DHCR24	1.2231	0.290545	no	lysate
sp|Q969X6|CIR1A_HUMAN	UTP4	1.2231	0.290545	no	lysate
sp|Q9H7B2|RPF2_HUMAN	RPF2	1.2231	0.290545	no	lysate
sp|Q14254|FLOT2_HUMAN	FLOT2	1.2231	0.290545	no	lysate
sp|Q9BVP2|GNL3_HUMAN	GNL3	1.0567	0.0795601	no	lysate
sp|O95251|KAT7_HUMAN	KAT7	1.2231	0.290545	no	lysate
sp|Q6ZRV2|FA83H_HUMAN	FAM83H	1.2231	0.290545	no	lysate
sp|Q3ZAQ7-2|VMA21_HUMAN	VMA21	1.2231	0.290545	no	lysate
sp|Q8N5M9|JAGN1_HUMAN	JAGN1	1.2231	0.290545	no	lysate
sp|Q96D05-2|CJ035_HUMAN	C10orf35	1.2231	0.290545	no	lysate
sp|O95147|DUS14_HUMAN	DUSP14	1.2231	0.290545	no	lysate
sp|Q52LR7|EPC2_HUMAN	EPC2	1.2231	0.290545	no	lysate
sp|O14770|MEIS2_HUMAN	MEIS2	1.2231	0.290545	no	lysate
sp|Q6WKZ4|RFIP1_HUMAN	RAB11FIP1	1.22085	0.287891	no	lysate
sp|P19022|CADH2_HUMAN	CDH2	1.22085	0.287891	no	lysate
sp|P35869|AHR_HUMAN	AHR	1.22043	0.287385	no	lysate
sp|Q6PK04|CC137_HUMAN	CCDC137	1.21818	0.28473	no	lysate
sp|Q96T58|MINT_HUMAN	SPEN	1.21818	0.28473	no	lysate
sp|Q08211|DHX9_HUMAN	DHX9	1.21818	0.28473	no	lysate
sp|O43390-2|HNRPR_HUMAN	HNRNPR	1.21818	0.28473	no	lysate
sp|P98179|RBM3_HUMAN	RBM3	1.21818	0.28473	no	lysate
sp|Q9NPA5|ZF64A_HUMAN	ZFP64	1.21818	0.28473	no	lysate
sp|Q9P2D6|F135A_HUMAN	FAM135A	1.21818	0.28473	no	lysate
sp|Q9H8W4|PKHF2_HUMAN	PLEKHF2	1.21818	0.28473	no	lysate
tr|H3BUF6|H3BUF6_HUMAN	#N/A	1.21768	0.284131	no	lysate
sp|P21291|CSRP1_HUMAN	CSRP1	1.21551	0.281563	no	lysate
sp|Q8N2K1-3|UB2J2_HUMAN	UBE2J2	1.21372	0.279436	no	lysate
sp|Q02952|AKA12_HUMAN	AKAP12	1.21328	0.278913	no	lysate
sp|Q9Y3C1|NOP16_HUMAN	NOP16	1.21328	0.278913	no	lysate
sp|Q9NVP1|DDX18_HUMAN	DDX18	1.21328	0.278913	no	lysate
sp|P53355-3|DAPK1_HUMAN	DAPK1	1.21328	0.278913	no	lysate
tr|Q5T9W8|Q5T9W8_HUMAN	#N/A	1.21328	0.278913	no	lysate
sp|Q12906|ILF3_HUMAN	ILF3	1.21328	0.278913	no	lysate
sp|O43293|DAPK3_HUMAN	DAPK3	1.21106	0.276269	no	lysate
sp|O00124|UBXN8_HUMAN	UBXN8	1.21106	0.276269	no	lysate
sp|Q9ULJ8-3|NEB1_HUMAN	PPP1R9A	1.21106	0.276269	no	lysate
sp|P10909-2|CLUS_HUMAN	CLU	1.21106	0.276269	no	lysate
sp|Q8IZ52|CHSS2_HUMAN	CHPF	1.21017	0.275208	no	lysate
sp|Q9NYH9|UTP6_HUMAN	UTP6	1.2084	0.273095	no	lysate
sp|Q9UK39|NOCT_HUMAN	NOCT	1.2084	0.273095	no	lysate
sp|Q9NQ84-2|GPC5C_HUMAN	GPRC5C	1.2084	0.273095	no	lysate
sp|O14907|TX1B3_HUMAN	TAX1BP3	1.2084	0.273095	no	lysate
sp|Q8NHQ8|RASF8_HUMAN	RASSF8	1.2084	0.273095	no	lysate
sp|Q9NUI1|DECR2_HUMAN	DECR2	1.2084	0.273095	no	lysate
sp|O95935|TBX18_HUMAN	TBX18	1.20624	0.270518	no	lysate
sp|Q9H6F5|CCD86_HUMAN	CCDC86	1.20619	0.270455	no	lysate
sp|Q9BV79|MECR_HUMAN	MECR	1.20619	0.270455	no	lysate
sp|Q9H6T0|ESRP2_HUMAN	ESRP2	1.20619	0.270455	no	lysate
sp|A0JNW5|UH1BL_HUMAN	UHRF1BP1L	1.20619	0.270455	no	lysate
sp|Q9NZI7|UBIP1_HUMAN	UBP1	1.20574	0.269913	no	lysate
sp|Q8TED1|GPX8_HUMAN	GPX8	1.20574	0.269913	no	lysate
sp|Q9BWG6|SCNM1_HUMAN	SCNM1	1.20574	0.269913	no	lysate
sp|P49916|DNLI3_HUMAN	LIG3	1.20353	0.267273	no	lysate
sp|P46087-4|NOP2_HUMAN	NOP2	1.20353	0.267273	no	lysate
sp|Q9HCD5|NCOA5_HUMAN	NCOA5	1.20353	0.267273	no	lysate
sp|Q8IWA0|WDR75_HUMAN	WDR75	1.20353	0.267273	no	lysate
sp|Q9NRW3|ABC3C_HUMAN	APOBEC3C	1.20353	0.267273	no	lysate
sp|Q9NRL2|BAZ1A_HUMAN	BAZ1A	1.20353	0.267273	no	lysate
sp|P31943|HNRH1_HUMAN	HNRNPH1	1.20353	0.267273	no	lysate
sp|Q8N7R7|CCYL1_HUMAN	CCNYL1	1.20353	0.267273	no	lysate
sp|Q9Y5J6|T10B_HUMAN	TIMM10B	1.20133	0.264638	no	lysate
sp|Q9BZE4|NOG1_HUMAN	GTPBP4	1.19868	0.26145	no	lysate
sp|Q8NDD1|CA131_HUMAN	C1orf131	1.19868	0.26145	no	lysate
sp|Q8NFY9|KBTB8_HUMAN	KBTBD8	1.19868	0.26145	no	lysate
sp|Q8IXJ9|ASXL1_HUMAN	ASXL1	1.19868	0.26145	no	lysate
sp|P19256|LFA3_HUMAN	CD58	1.19868	0.26145	no	lysate
sp|Q12926|ELAV2_HUMAN	ELAVL2	1.19868	0.26145	no	lysate
sp|Q9H981|ARP8_HUMAN	ACTR8	1.19868	0.26145	no	lysate
tr|H0YEH1|H0YEH1_HUMAN	#N/A	1.19868	0.26145	no	lysate
sp|Q8TDW0|LRC8C_HUMAN	LRRC8C	1.19603	0.258255	no	lysate
sp|O94901-9|SUN1_HUMAN	SUN1	1.19603	0.258255	no	lysate
sp|Q96SB3|NEB2_HUMAN	PPP1R9B	1.19603	0.258255	no	lysate
sp|Q01085-2|TIAR_HUMAN	TIAL1	1.19385	0.255624	no	lysate
sp|P17844|DDX5_HUMAN	DDX5	1.19385	0.255624	no	lysate
sp|Q9BSC4|NOL10_HUMAN	NOL10	1.19385	0.255624	no	lysate
sp|Q9BUP0|EFHD1_HUMAN	EFHD1	1.19385	0.255624	no	lysate
sp|Q9Y5J1|UTP18_HUMAN	UTP18	1.19385	0.255624	no	lysate
sp|Q5T3I0-3|GPTC4_HUMAN	GPATCH4	1.19385	0.255624	no	lysate
sp|P55789|ALR_HUMAN	GFER	1.19385	0.255624	no	lysate
sp|Q9UL40|ZN346_HUMAN	ZNF346	1.19385	0.255624	no	lysate
sp|O43390|HNRPR_HUMAN	HNRNPR	1.19385	0.255624	no	lysate
sp|P26572|MGAT1_HUMAN	MGAT1	1.19385	0.255624	no	lysate
sp|P29558|RBMS1_HUMAN	MIR4785	1.19385	0.255624	no	lysate
sp|Q9H0V1|TM168_HUMAN	TMEM168	1.19385	0.255624	no	lysate
sp|Q9NZH0-2|GPC5B_HUMAN	GPRC5B	1.19385	0.255624	no	lysate
sp|Q9H706|GAREM_HUMAN	GAREM1	1.19385	0.255624	no	lysate
sp|Q8WVR3|CG043_HUMAN	C7orf43	1.19385	0.255624	no	lysate
sp|Q7L1W4|LRC8D_HUMAN	LRRC8D	1.19338	0.255052	no	lysate
sp|Q5SZK8|FREM2_HUMAN	FREM2	1.1929	0.254478	no	lysate
sp|Q9NWT1|PK1IP_HUMAN	PAK1IP1	1.19168	0.252999	no	lysate
sp|P53671-3|LIMK2_HUMAN	LIMK2	1.19168	0.252999	no	lysate
sp|Q9UMY1|NOL7_HUMAN	NOL7	1.19121	0.252422	no	lysate
sp|Q9BQI0-2|AIF1L_HUMAN	AIF1L	1.19121	0.252422	no	lysate
sp|Q92841|DDX17_HUMAN	DDX17	1.18904	0.249797	no	lysate
sp|P28370|SMCA1_HUMAN	SMARCA1	1.18904	0.249797	no	lysate
sp|P06756|ITAV_HUMAN	ITGAV	1.18904	0.249797	no	lysate
sp|Q13490|BIRC2_HUMAN	BIRC2	1.18904	0.249797	no	lysate
sp|O75629|CREG1_HUMAN	CREG1	1.18904	0.249797	no	lysate
sp|P61244|MAX_HUMAN	MAX	1.18904	0.249797	no	lysate
sp|Q16527|CSRP2_HUMAN	CSRP2	1.18904	0.249797	no	lysate
sp|O60930|RNH1_HUMAN	RNASEH1	1.18904	0.249797	no	lysate
sp|Q6UW68|TM205_HUMAN	TMEM205	1.18904	0.249797	no	lysate
sp|Q96S97|MYADM_HUMAN	MYADM	1.18904	0.249797	no	lysate
sp|Q08AG7|MZT1_HUMAN	MZT1	1.18904	0.249797	no	lysate
sp|P04626|ERBB2_HUMAN	ERBB2	1.18856	0.249212	no	lysate
sp|P14316|IRF2_HUMAN	IRF2	1.1864	0.246587	no	lysate
sp|Q75N90|FBN3_HUMAN	FBN3	1.18542	0.245402	no	lysate
sp|Q9NW13|RBM28_HUMAN	RBM28	1.18424	0.243966	no	lysate
sp|Q9NY61|AATF_HUMAN	AATF	1.18424	0.243966	no	lysate
sp|Q99962|SH3G2_HUMAN	SH3GL2	1.18424	0.243966	no	lysate
sp|Q8TDB4|HUMMR_HUMAN	MGARP	1.18424	0.243966	no	lysate
sp|P29375|KDM5A_HUMAN	KDM5A	1.18424	0.243966	no	lysate
sp|O75157|T22D2_HUMAN	TSC22D2	1.18424	0.243966	no	lysate
sp|Q8IYB1|M21D2_HUMAN	MB21D2	1.18424	0.243966	no	lysate
sp|Q12899|TRI26_HUMAN	TRIM26	1.18424	0.243966	no	lysate
tr|K7ENA0|K7ENA0_HUMAN	#N/A	1.18424	0.243966	no	lysate
sp|Q96BT3|CENPT_HUMAN	CENPT	1.18424	0.243966	no	lysate
sp|Q96EE4|CC126_HUMAN	CCDC126	1.18424	0.243966	no	lysate
sp|O43818|U3IP2_HUMAN	RRP9	1.1821	0.24135	no	lysate
sp|P55795|HNRH2_HUMAN	HNRNPH2	1.18161	0.24075	no	lysate
sp|Q86WR7|PRSR2_HUMAN	PROSER2	1.18161	0.24075	no	lysate
sp|P56199|ITA1_HUMAN	ITGA1	1.17996	0.238739	no	lysate
sp|Q12906-7|ILF3_HUMAN	ILF3	1.17947	0.238134	no	lysate
sp|Q9NQW6|ANLN_HUMAN	ANLN	1.17947	0.238134	no	lysate
sp|Q6PI98-4|IN80C_HUMAN	INO80C	1.17947	0.238134	no	lysate
sp|Q9H4W6|COE3_HUMAN	EBF3	1.17947	0.238134	no	lysate
sp|Q12774|ARHG5_HUMAN	ARHGEF5	1.17947	0.238134	no	lysate
sp|Q9UHN1|DPOG2_HUMAN	POLG2	1.17947	0.238134	no	lysate
sp|Q71RG4|TMUB2_HUMAN	TMUB2	1.17897	0.237526	no	lysate
sp|Q52LW3|RHG29_HUMAN	ARHGAP29	1.17897	0.237526	no	lysate
sp|Q8N5U6-2|RNF10_HUMAN	RNF10	1.17783	0.236133	no	lysate
sp|Q6P597-3|KLC3_HUMAN	KLC3	1.17733	0.235522	no	lysate
sp|P15848|ARSB_HUMAN	ARSB	1.17733	0.235522	no	lysate
sp|O00273-2|DFFA_HUMAN	DFFA	1.17683	0.23491	no	lysate
sp|O15327|INP4B_HUMAN	INPP4B	1.17683	0.23491	no	lysate
sp|P45877|PPIC_HUMAN	PPIC	1.17471	0.232299	no	lysate
sp|Q01658|NC2B_HUMAN	DR1	1.17471	0.232299	no	lysate
sp|Q13029|PRDM2_HUMAN	PRDM2	1.17471	0.232299	no	lysate
sp|Q9Y608|LRRF2_HUMAN	LRRFIP2	1.17471	0.232299	no	lysate
sp|Q8N6M3|FITM2_HUMAN	FITM2	1.17471	0.232299	no	lysate
sp|Q9Y388|RBMX2_HUMAN	RBMX2	1.17471	0.232299	no	lysate
sp|Q9UEU0|VTI1B_HUMAN	VTI1B	1.17471	0.232299	no	lysate
sp|Q8N5G0|SMI20_HUMAN	SMIM20	1.17258	0.229692	no	lysate
sp|P55201|BRPF1_HUMAN	BRPF1	1.17208	0.229067	no	lysate
sp|P02786|TFR1_HUMAN	TFRC	1.16996	0.226461	no	lysate
sp|P67809|YBOX1_HUMAN	YBX1	1.16996	0.226461	no	lysate
sp|Q14978-2|NOLC1_HUMAN	NOLC1	1.16996	0.226461	no	lysate
sp|Q9HBI1-2|PARVB_HUMAN	PARVB	1.16996	0.226461	no	lysate
sp|P45880-1|VDAC2_HUMAN	VDAC2	1.16996	0.226461	no	lysate
sp|Q13884|SNTB1_HUMAN	SNTB1	1.16996	0.226461	no	lysate
sp|Q8N0U8|VKORL_HUMAN	VKORC1L1	1.16996	0.226461	no	lysate
sp|Q969K3-2|RNF34_HUMAN	RNF34	1.16996	0.226461	no	lysate
sp|P03973|SLPI_HUMAN	SLPI	1.16996	0.226461	no	lysate
sp|Q765P7|MTSSL_HUMAN	MTSS1L	1.16996	0.226461	no	lysate
sp|Q02083|NAAA_HUMAN	NAAA	1.16996	0.226461	no	lysate
sp|Q96EY1-2|DNJA3_HUMAN	DNAJA3	1.16893	0.225195	no	lysate
sp|Q99735|MGST2_HUMAN	MGST2	1.16837	0.224493	no	lysate
sp|Q9BV29-2|CO057_HUMAN	C15orf57	1.16785	0.223859	no	lysate
sp|Q13443|ADAM9_HUMAN	ADAM9	1.16785	0.223859	no	lysate
sp|P35579|MYH9_HUMAN	MYH9	1.16734	0.223223	no	lysate
sp|Q66K64|DCA15_HUMAN	DCAF15	1.16734	0.223223	no	lysate
sp|P04035-3|HMDH_HUMAN	HMGCR	1.16734	0.223223	no	lysate
sp|O95210|STBD1_HUMAN	STBD1	1.16734	0.223223	no	lysate
sp|P35749-2|MYH11_HUMAN	MYH11	1.16523	0.220621	no	lysate
sp|Q8IWS0|PHF6_HUMAN	PHF6	1.16523	0.220621	no	lysate
sp|Q9ULV0|MYO5B_HUMAN	MYO5B	1.16523	0.220621	no	lysate
sp|Q8N2Z9|CENPS_HUMAN	MHF1	1.16523	0.220621	no	lysate
sp|O00512|BCL9_HUMAN	BCL9	1.16523	0.220621	no	lysate
sp|Q9UHC6|CNTP2_HUMAN	CNTNAP2	1.16523	0.220621	no	lysate
sp|Q13686|ALKB1_HUMAN	ALKBH1	1.16523	0.220621	no	lysate
sp|Q6ZRS2|SRCAP_HUMAN	SRCAP	1.0567	0.0795601	no	lysate
sp|Q93098|WNT8B_HUMAN	WNT8B	1.16523	0.220621	no	lysate
sp|O75128-2|COBL_HUMAN	COBL	1.16471	0.219977	no	lysate
sp|Q9UPW6|SATB2_HUMAN	SATB2	1.16314	0.218024	no	lysate
sp|P49641|MA2A2_HUMAN	MAN2A2	1.16262	0.217375	no	lysate
sp|Q9Y277-2|VDAC3_HUMAN	VDAC3	1.16053	0.214778	no	lysate
sp|P07942|LAMB1_HUMAN	LAMB1	1.16053	0.214778	no	lysate
sp|P11047|LAMC1_HUMAN	LAMC1	1.16053	0.214778	no	lysate
sp|Q16763|UBE2S_HUMAN	UBE2S	1.16053	0.214778	no	lysate
sp|Q01826-2|SATB1_HUMAN	SATB1	1.16053	0.214778	no	lysate
sp|Q9Y2P8|RCL1_HUMAN	RCL1	1.16053	0.214778	no	lysate
sp|Q96PM9|Z385A_HUMAN	ZNF385A	1.16053	0.214778	no	lysate
sp|Q7L9B9|EEPD1_HUMAN	EEPD1	1.16053	0.214778	no	lysate
sp|Q96HD1-2|CREL1_HUMAN	CRELD1	1.16053	0.214778	no	lysate
sp|Q99828|CIB1_HUMAN	CIB1	1.16053	0.214778	no	lysate
sp|Q9Y2K6|UBP20_HUMAN	USP20	1.16053	0.214778	no	lysate
sp|Q9BT67|NFIP1_HUMAN	NDFIP1	1.16053	0.214778	no	lysate
sp|Q9UI42|CBPA4_HUMAN	CPA4	1.71739	0.780219	yes	exosome
sp|Q8N2H9|PELI3_HUMAN	PELI3	1.16053	0.214778	no	lysate
sp|Q9H910-2|HN1L_HUMAN	HN1L	1.1595	0.213499	no	lysate
sp|O95793|STAU1_HUMAN	STAU1	1.15844	0.212186	no	lysate
sp|Q9BRD0|BUD13_HUMAN	BUD13	1.15844	0.212186	no	lysate
sp|Q96DP5|FMT_HUMAN	MTFMT	1.15844	0.212186	no	lysate
sp|P55769|NH2L1_HUMAN	SNU13	1.15844	0.212186	no	lysate
sp|Q9Y320|TMX2_HUMAN	TMX2	1.15791	0.211525	no	lysate
sp|P05412|JUN_HUMAN	JUN	1.15791	0.211525	no	lysate
tr|H7BYY1|H7BYY1_HUMAN	#N/A	1.15583	0.208933	no	lysate
sp|Q9UQB8|BAIP2_HUMAN	BAIAP2	1.15583	0.208933	no	lysate
sp|Q9H0W8|SMG9_HUMAN	SMG9	1.15583	0.208933	no	lysate
sp|P06748|NPM_HUMAN	NPM1	1.15583	0.208933	no	lysate
sp|A6NHQ2|FBLL1_HUMAN	FBLL1	1.15583	0.208933	no	lysate
sp|O15121|DEGS1_HUMAN	DEGS1	1.15583	0.208933	no	lysate
sp|P14621|ACYP2_HUMAN	ACYP2	1.15583	0.208933	no	lysate
sp|Q92979|NEP1_HUMAN	EMG1	1.15583	0.208933	no	lysate
sp|P62070|RRAS2_HUMAN	RRAS2	1.15583	0.208933	no	lysate
sp|Q96G21|IMP4_HUMAN	IMP4	1.15583	0.208933	no	lysate
sp|Q9Y4E5|ZN451_HUMAN	ZNF451	1.15583	0.208933	no	lysate
tr|K7EKQ2|K7EKQ2_HUMAN	#N/A	1.15583	0.208933	no	lysate
sp|Q6NUP7|PP4R4_HUMAN	PPP4R4	1.15583	0.208933	no	lysate
sp|Q8N0Z3|SPICE_HUMAN	SPICE1	1.15583	0.208933	no	lysate
sp|Q16533|SNPC1_HUMAN	SNAPC1	1.15583	0.208933	no	lysate
sp|Q9NQZ2|SAS10_HUMAN	UTP3	1.15376	0.206345	no	lysate
sp|P38435|VKGC_HUMAN	GGCX	1.15376	0.206345	no	lysate
sp|Q6IN84|MRM1_HUMAN	MRM1	1.15322	0.205672	no	lysate
sp|Q9BVL4|SELO_HUMAN	SELO	1.15268	0.204997	no	lysate
sp|O60488|ACSL4_HUMAN	ACSL4	1.15116	0.203084	no	lysate
sp|Q8IZQ5|SELH_HUMAN	C11orf31	1.15116	0.203084	no	lysate
sp|P25490|TYY1_HUMAN	MIR6764	1.15116	0.203084	no	lysate
sp|Q9H0S4|DDX47_HUMAN	DDX47	1.15116	0.203084	no	lysate
sp|Q14103|HNRPD_HUMAN	HNRNPD	1.15116	0.203084	no	lysate
sp|Q5M775|CYTSB_HUMAN	SPECC1	1.15116	0.203084	no	lysate
sp|Q13601|KRR1_HUMAN	KRR1	1.15116	0.203084	no	lysate
sp|Q9Y6A9|SPCS1_HUMAN	SPCS1	1.15116	0.203084	no	lysate
sp|P23352|KALM_HUMAN	ANOS1	1.15116	0.203084	no	lysate
sp|Q16514|TAF12_HUMAN	TAF12	1.15061	0.202405	no	lysate
sp|P10620|MGST1_HUMAN	MGST1	1.15018	0.201862	no	lysate
sp|Q9H8H0|NOL11_HUMAN	NOL11	1.1491	0.200501	no	lysate
sp|Q96HR9|REEP6_HUMAN	REEP6	1.1491	0.200501	no	lysate
sp|Q92520|FAM3C_HUMAN	FAM3C	1.14855	0.199817	no	lysate
sp|Q9BV81|EMC6_HUMAN	EMC6	1.14855	0.199817	no	lysate
sp|Q14978-3|NOLC1_HUMAN	NOLC1	1.14855	0.199817	no	lysate
sp|Q9Y3E0|GOT1B_HUMAN	GOLT1B	1.14705	0.197923	no	lysate
sp|P13797|PLST_HUMAN	PLS3	1.1465	0.197234	no	lysate
sp|Q9Y3A4|RRP7A_HUMAN	RRP7A	1.1465	0.197234	no	lysate
sp|Q9H583|HEAT1_HUMAN	HEATR1	1.1465	0.197234	no	lysate
sp|Q9NPQ8-4|RIC8A_HUMAN	MIR6743	1.1465	0.197234	no	lysate
sp|O75494|SRS10_HUMAN	SRSF10	1.1465	0.197234	no	lysate
sp|Q6DKI1|RL7L_HUMAN	RPL7L1	1.3741	0.458491	yes	lysate
sp|Q13277|STX3_HUMAN	STX3	1.1465	0.197234	no	lysate
sp|Q9UBV7|B4GT7_HUMAN	B4GALT7	1.1465	0.197234	no	lysate
sp|Q17RS7|GEN_HUMAN	GEN1	1.1465	0.197234	no	lysate
sp|Q96EY4|TMA16_HUMAN	TMA16	1.1465	0.197234	no	lysate
sp|Q8N9N5|BANP_HUMAN	BANP	1.1465	0.197234	no	lysate
sp|Q9UNZ5|L10K_HUMAN	C19orf53	1.1465	0.197234	no	lysate
sp|O00294|TULP1_HUMAN	TULP1	1.1465	0.197234	no	lysate
sp|Q9Y259|CHKB_HUMAN	CHKB	1.1465	0.197234	no	lysate
sp|P48730|KC1D_HUMAN	CSNK1D	1.14595	0.196542	no	lysate
sp|Q96T60|PNKP_HUMAN	PNKP	1.14445	0.194655	no	lysate
sp|Q16656|NRF1_HUMAN	NRF1	1.1439	0.193958	no	lysate
sp|O75369|FLNB_HUMAN	FLNB	1.1439	0.193958	no	lysate
sp|Q9BQ75|CMS1_HUMAN	CMSS1	1.1439	0.193958	no	lysate
sp|Q8NB78|KDM1B_HUMAN	KDM1B	1.1439	0.193958	no	lysate
sp|Q8IZ21-2|PHAR4_HUMAN	PHACTR4	1.14241	0.192081	no	lysate
sp|Q8TEQ8|PIGO_HUMAN	PIGO	1.14241	0.192081	no	lysate
sp|P02545|LMNA_HUMAN	LMNA	1.14186	0.19138	no	lysate
sp|Q9Y2D5-6|AKAP2_HUMAN	AKAP2	1.14186	0.19138	no	lysate
sp|Q14692|BMS1_HUMAN	BMS1	1.14186	0.19138	no	lysate
sp|Q9NXW2-2|DJB12_HUMAN	DNAJB12	1.14186	0.19138	no	lysate
sp|Q9BVJ6|UT14A_HUMAN	UTP14A	1.14186	0.19138	no	lysate
sp|Q96JJ7|TMX3_HUMAN	TMX3	1.14186	0.19138	no	lysate
sp|Q6NUK1|SCMC1_HUMAN	SLC25A24	1.14186	0.19138	no	lysate
sp|O00151|PDLI1_HUMAN	PDLIM1	1.14186	0.19138	no	lysate
tr|K7EJH8|K7EJH8_HUMAN	#N/A	1.14186	0.19138	no	lysate
sp|O14735|CDIPT_HUMAN	CDIPT	1.14186	0.19138	no	lysate
sp|O14523-2|C2C2L_HUMAN	C2CD2L	1.14186	0.19138	no	lysate
sp|Q9H6L5|F134B_HUMAN	FAM134B	1.14186	0.19138	no	lysate
sp|O95755|RAB36_HUMAN	RAB36	1.14167	0.191144	no	lysate
sp|Q01850|CDR2_HUMAN	CDR2	1.14038	0.189512	no	lysate
sp|Q9UJC5|SH3L2_HUMAN	SH3BGRL2	1.13982	0.188806	no	lysate
sp|Q9NUQ2|PLCE_HUMAN	AGPAT5	1.13982	0.188806	no	lysate
tr|M0R042|M0R042_HUMAN	#N/A	1.13982	0.188806	no	lysate
sp|Q9BVT8|TMUB1_HUMAN	TMUB1	1.13982	0.188806	no	lysate
sp|P40121|CAPG_HUMAN	CAPG	1.13926	0.188097	no	lysate
sp|Q5HYK3|COQ5_HUMAN	COQ5	1.13779	0.186237	no	lysate
sp|P49759-3|CLK1_HUMAN	CLK1	1.13779	0.186237	no	lysate
sp|P18206|VINC_HUMAN	VCL	1.13723	0.185523	no	lysate
sp|P49768|PSN1_HUMAN	PSEN1	1.13723	0.185523	no	lysate
sp|Q9NZI8|IF2B1_HUMAN	IGF2BP1	1.13723	0.185523	no	lysate
sp|O95478|NSA2_HUMAN	NSA2	1.13723	0.185523	no	lysate
sp|Q99848|EBP2_HUMAN	EBNA1BP2	1.13723	0.185523	no	lysate
sp|Q13112|CAF1B_HUMAN	CHAF1B	1.13723	0.185523	no	lysate
sp|Q8NDV7|TNR6A_HUMAN	TNRC6A	1.13723	0.185523	no	lysate
sp|P28290|SSFA2_HUMAN	SSFA2	1.13723	0.185523	no	lysate
sp|P38935|SMBP2_HUMAN	IGHMBP2	1.13723	0.185523	no	lysate
sp|Q01459|DIAC_HUMAN	CTBS	1.13723	0.185523	no	lysate
sp|P60602|ROMO1_HUMAN	ROMO1	1.13723	0.185523	no	lysate
sp|Q6P1S2|CC033_HUMAN	C3orf33	1.13723	0.185523	no	lysate
sp|O75427|LRCH4_HUMAN	LRCH4	1.13723	0.185523	no	lysate
sp|O75410-2|TACC1_HUMAN	TACC1	1.13521	0.182954	no	lysate
sp|Q9NPE3|NOP10_HUMAN	NOP10	1.13521	0.182954	no	lysate
sp|O14828-2|SCAM3_HUMAN	SCAMP3	1.13521	0.182954	no	lysate
sp|Q9UP52|TFR2_HUMAN	TFR2	1.13521	0.182954	no	lysate
sp|Q9BZK3|NACP1_HUMAN	NACAP1	1.13521	0.182954	no	lysate
sp|Q53T94|TAF1B_HUMAN	TAF1B	1.13521	0.182954	no	lysate
sp|O43683|BUB1_HUMAN	BUB1	1.13464	0.182233	no	lysate
sp|Q14435|GALT3_HUMAN	GALNT3	1.13464	0.182233	no	lysate
sp|Q9NZC3|GDE1_HUMAN	GDE1	1.13464	0.182233	no	lysate
sp|Q8WUF5|IASPP_HUMAN	PPP1R13L	1.13319	0.180389	no	lysate
sp|Q8NFP7|NUD10_HUMAN	NUDT10	1.13319	0.180389	no	lysate
sp|Q8WX93|PALLD_HUMAN	PALLD	1.13262	0.179664	no	lysate
sp|Q9UKD2|MRT4_HUMAN	MRTO4	1.13262	0.179664	no	lysate
sp|P09497-2|CLCB_HUMAN	CLTB	1.13262	0.179664	no	lysate
sp|Q9Y2H6|FND3A_HUMAN	FNDC3A	1.05852	0.0820539	no	lysate
tr|E5RGW4|E5RGW4_HUMAN	#N/A	1.13262	0.179664	no	lysate
sp|Q9H4H8|FA83D_HUMAN	FAM83D	1.13262	0.179664	no	lysate
sp|Q8NC42|RN149_HUMAN	RNF149	1.13262	0.179664	no	lysate
sp|Q8WV22|NSE1_HUMAN	NSMCE1	1.13262	0.179664	no	lysate
sp|Q96L58|B3GT6_HUMAN	B3GALT6	1.13262	0.179664	no	lysate
sp|Q9BQD3|KXDL1_HUMAN	KXD1	1.13262	0.179664	no	lysate
sp|P78368|KC1G2_HUMAN	CSNK1G2	1.13262	0.179664	no	lysate
sp|Q6UWW8|EST3_HUMAN	CES3	1.13262	0.179664	no	lysate
sp|Q13625-3|ASPP2_HUMAN	TP53BP2	1.13061	0.177099	no	lysate
sp|Q9BVQ7|SPA5L_HUMAN	SPATA5L1	1.13061	0.177099	no	lysate
sp|Q9H6E5|STPAP_HUMAN	TUT1	1.13061	0.177099	no	lysate
sp|P35221|CTNA1_HUMAN	CTNNA1	1.13003	0.176366	no	lysate
sp|P49023-3|PAXI_HUMAN	PXN	1.07416	0.103204	no	lysate
sp|Q14690|RRP5_HUMAN	PDCD11	1.12803	0.173802	no	lysate
sp|Q49B96|COX19_HUMAN	COX19	1.10081	0.138562	no	lysate
sp|Q14126|DSG2_HUMAN	DSG2	1.12803	0.173802	no	lysate
sp|Q01130|SRSF2_HUMAN	MIR636	1.12803	0.173802	no	lysate
sp|Q53HL2|BOREA_HUMAN	CDCA8	1.12803	0.173802	no	lysate
sp|Q92997|DVL3_HUMAN	DVL3	1.12803	0.173802	no	lysate
sp|Q8IWZ3-2|ANKH1_HUMAN	ANKHD1	1.12803	0.173802	no	lysate
sp|Q7Z2E3|APTX_HUMAN	APTX	1.12803	0.173802	no	lysate
sp|Q9UHP3-3|UBP25_HUMAN	USP25	1.12803	0.173802	no	lysate
sp|Q8WUP2-2|FBLI1_HUMAN	FBLIM1	1.12803	0.173802	no	lysate
sp|Q9H9L3|I20L2_HUMAN	ISG20L2	1.12803	0.173802	no	lysate
sp|Q0D2I5-5|IFFO1_HUMAN	IFFO1	1.12745	0.173061	no	lysate
sp|Q9Y3B9|RRP15_HUMAN	RRP15	1.12545	0.170496	no	lysate
sp|Q6P5Z2|PKN3_HUMAN	PKN3	1.12545	0.170496	no	lysate
sp|Q8WTS1|ABHD5_HUMAN	ABHD5	1.12486	0.169748	no	lysate
sp|Q01105-2|SET_HUMAN	SET	1.12462	0.169432	no	lysate
sp|O75461|E2F6_HUMAN	E2F6	1.12403	0.168686	no	lysate
sp|Q96KC8|DNJC1_HUMAN	DNAJC1	1.12403	0.168686	no	lysate
sp|Q8N0Z8|PUSL1_HUMAN	PUSL1	1.12369	0.168243	no	lysate
sp|Q68CQ4|DIEXF_HUMAN	DIEXF	1.12345	0.167936	no	lysate
sp|Q93063-3|EXT2_HUMAN	EXT2	1.12345	0.167936	no	lysate
sp|Q8N9T8|KRI1_HUMAN	KRI1	1.12345	0.167936	no	lysate
sp|Q9UNX4|WDR3_HUMAN	WDR3	1.12345	0.167936	no	lysate
sp|P15311|EZRI_HUMAN	EZR	1.03521	0.0499183	no	lysate
sp|Q96GZ6|S41A3_HUMAN	SLC41A3	1.12345	0.167936	no	lysate
sp|O14957|QCR10_HUMAN	UQCR11	1.12345	0.167936	no	lysate
sp|Q8IU60|DCP2_HUMAN	DCP2	1.12345	0.167936	no	lysate
sp|Q14011|CIRBP_HUMAN	CIRBP	1.12345	0.167936	no	lysate
sp|Q96MG7|MAGG1_HUMAN	NSMCE3	1.12345	0.167936	no	lysate
sp|Q02446|SP4_HUMAN	SP4	1.12345	0.167936	no	lysate
sp|Q04721|NOTC2_HUMAN	NOTCH2	1.1465	0.197234	no	lysate
sp|Q96LZ7-2|RMD2_HUMAN	RMDN2	1.12345	0.167936	no	lysate
sp|Q6ZS30|NBEL1_HUMAN	NBEAL1	1.12345	0.167936	no	lysate
sp|O60858-3|TRI13_HUMAN	TRIM13	1.12345	0.167936	no	lysate
sp|Q6MZP7|LIN54_HUMAN	LIN54	1.12286	0.167184	no	lysate
sp|Q9HAF1-3|EAF6_HUMAN	MEAF6	1.12286	0.167184	no	lysate
sp|P17535|JUND_HUMAN	JUND	1.12205	0.166134	no	lysate
sp|Q86XK3-2|SFR1_HUMAN	SFR1	1.12205	0.166134	no	lysate
sp|Q9GZL7|WDR12_HUMAN	WDR12	1.12146	0.16538	no	lysate
sp|Q6PII3|CC174_HUMAN	CCDC174	1.12146	0.16538	no	lysate
sp|Q9NRM2|ZN277_HUMAN	ZNF277	1.12146	0.16538	no	lysate
sp|P31483|TIA1_HUMAN	TIA1	1.12087	0.164623	no	lysate
sp|Q9NUL3|STAU2_HUMAN	STAU2	1.12087	0.164623	no	lysate
sp|Q92692|PVRL2_HUMAN	NECTIN2	1.12087	0.164623	no	lysate
sp|O95359|TACC2_HUMAN	TACC2	1.12087	0.164623	no	lysate
sp|O00541|PESC_HUMAN	PES1	1.12087	0.164623	no	lysate
sp|O14653-2|GOSR2_HUMAN	GOSR2	1.12087	0.164623	no	lysate
sp|Q9BQE3|TBA1C_HUMAN	TUBA1C	1.12087	0.164623	no	lysate
sp|O76024|WFS1_HUMAN	WFS1	1.12087	0.164623	no	lysate
sp|Q92908|GATA6_HUMAN	GATA6	1.12087	0.164623	no	lysate
sp|Q68D10|SPT2_HUMAN	SPTY2D1	1.12087	0.164623	no	lysate
sp|P28799|GRN_HUMAN	GRN	1.05237	0.0736396	no	lysate
sp|Q96C92-4|SDCG3_HUMAN	SDCCAG3	1.11948	0.162829	no	lysate
sp|P21796|VDAC1_HUMAN	VDAC1	1.11889	0.162068	no	lysate
sp|P56182|RRP1_HUMAN	RRP1	1.11889	0.162068	no	lysate
sp|P35580|MYH10_HUMAN	MYH10	1.11889	0.162068	no	lysate
sp|P06753-5|TPM3_HUMAN	TPM3	1.11889	0.162068	no	lysate
sp|P60660-2|MYL6_HUMAN	MYL6	1.11889	0.162068	no	lysate
sp|Q96C57|CL043_HUMAN	C12orf43	1.11889	0.162068	no	lysate
sp|P08183|MDR1_HUMAN	ABCB1	1.11889	0.162068	no	lysate
sp|Q9BY49|PECR_HUMAN	PECR	1.11889	0.162068	no	lysate
sp|P13747|HLAE_HUMAN	HLA-E	1.11889	0.162068	no	lysate
sp|Q4KMQ1|TPRN_HUMAN	TPRN	1.11889	0.162068	no	lysate
sp|Q9NX24|NHP2_HUMAN	NHP2	1.11889	0.162068	no	lysate
sp|Q68CZ1|FTM_HUMAN	RPGRIP1L	1.11889	0.162068	no	lysate
sp|Q14114|LRP8_HUMAN	LRP8	1.11889	0.162068	no	lysate
sp|Q9NWX5|ASB6_HUMAN	ASB6	1.11889	0.162068	no	lysate
sp|Q14678|KANK1_HUMAN	KANK1	1.11889	0.162068	no	lysate
sp|Q9HCH0|NCK5L_HUMAN	NCKAP5L	1.11889	0.162068	no	lysate
sp|O94964-2|SOGA1_HUMAN	SOGA1	1.11751	0.160283	no	lysate
sp|Q9H496|IFG15_HUMAN	TOR1AIP2	1.11751	0.160283	no	lysate
tr|E7EVY3|E7EVY3_HUMAN	#N/A	1.16523	0.220621	no	lysate
sp|Q9UHW9|S12A6_HUMAN	SLC12A6	1.11691	0.159517	no	lysate
sp|Q8ND83|SLAI1_HUMAN	SLAIN1	1.11691	0.159517	no	lysate
sp|Q9H000|MKRN2_HUMAN	MKRN2	1.11691	0.159517	no	lysate
sp|Q96IZ5|RBM41_HUMAN	RBM41	1.11691	0.159517	no	lysate
sp|Q5SNT2|TM201_HUMAN	TMEM201	1.11632	0.158747	no	lysate
sp|O60220|TIM8A_HUMAN	TIMM8A	1.11632	0.158747	no	lysate
sp|Q8N6S4|AN13C_HUMAN	ANKRD13C	1.11452	0.156421	no	lysate
sp|P62736|ACTA_HUMAN	ACTA2	1.11435	0.156196	no	lysate
sp|Q9H9G7|AGO3_HUMAN	AGO3	1.11435	0.156196	no	lysate
sp|Q8NI36|WDR36_HUMAN	WDR36	1.11435	0.156196	no	lysate
sp|Q9GZR2|REXO4_HUMAN	REXO4	1.11435	0.156196	no	lysate
sp|Q9BSY9|DESI2_HUMAN	DESI2	1.11435	0.156196	no	lysate
sp|P40123|CAP2_HUMAN	CAP2	1.11435	0.156196	no	lysate
sp|P57088|TMM33_HUMAN	TMEM33	1.11435	0.156196	no	lysate
sp|Q8NEJ9|NGDN_HUMAN	NGDN	1.11435	0.156196	no	lysate
sp|Q9NPA0|EMC7_HUMAN	EMC7	1.11435	0.156196	no	lysate
sp|Q6PJT7-3|ZC3HE_HUMAN	ZC3H14	1.11435	0.156196	no	lysate
sp|O76074|PDE5A_HUMAN	PDE5A	1.11435	0.156196	no	lysate
sp|Q86VW0|SESD1_HUMAN	SESTD1	1.11435	0.156196	no	lysate
sp|P51159|RB27A_HUMAN	RAB27A	1.11435	0.156196	no	lysate
sp|O43909|EXTL3_HUMAN	EXTL3	1.11435	0.156196	no	lysate
tr|H0YL70|H0YL70_HUMAN	#N/A	1.11298	0.154428	no	lysate
sp|Q15269|PWP2_HUMAN	PWP2	1.11238	0.153649	no	lysate
sp|Q8TE76|MORC4_HUMAN	MORC4	1.11238	0.153649	no	lysate
sp|Q8NFQ8|TOIP2_HUMAN	TOR1AIP2	1.11178	0.152868	no	lysate
sp|O43677|NDUC1_HUMAN	NDUFC1	1.11178	0.152868	no	lysate
sp|Q9NZB8|MOCS1_HUMAN	MOCS1	1.11178	0.152868	no	lysate
sp|Q9ULW3|ABT1_HUMAN	ABT1	1.11178	0.152868	no	lysate
sp|Q8WU10|PYRD1_HUMAN	PYROXD1	1.11178	0.152868	no	lysate
sp|Q6ZUM4|RHG27_HUMAN	ARHGAP27	1.11178	0.152868	no	lysate
sp|P52943-2|CRIP2_HUMAN	CRIP2	1.11132	0.15228	no	lysate
sp|Q96PU4|UHRF2_HUMAN	UHRF2	1.11042	0.151107	no	lysate
sp|Q6IQ23-2|PKHA7_HUMAN	PLEKHA7	1.11042	0.151107	no	lysate
sp|Q9P2E9|RRBP1_HUMAN	RRBP1	1.10982	0.150321	no	lysate
sp|Q6WCQ1-2|MPRIP_HUMAN	MPRIP	1.10982	0.150321	no	lysate
sp|Q69YQ0|CYTSA_HUMAN	SPECC1L	1.10982	0.150321	no	lysate
sp|P60709|ACTB_HUMAN	ACTB	1.10982	0.150321	no	lysate
sp|O14745|NHRF1_HUMAN	MIR3615	1.10982	0.150321	no	lysate
sp|Q96KR1|ZFR_HUMAN	ZFR	1.10982	0.150321	no	lysate
sp|Q13492|PICAL_HUMAN	PICALM	1.10982	0.150321	no	lysate
sp|Q9BRX9|WDR83_HUMAN	WDR83	1.10982	0.150321	no	lysate
sp|Q9P2B4|CT2NL_HUMAN	CTTNBP2NL	1.10982	0.150321	no	lysate
sp|Q9NYP3|DONS_HUMAN	DONSON	1.10982	0.150321	no	lysate
sp|Q13418|ILK_HUMAN	ILK	1.10982	0.150321	no	lysate
sp|P18850|ATF6A_HUMAN	ATF6	1.10982	0.150321	no	lysate
sp|Q07820|MCL1_HUMAN	MCL1	1.10982	0.150321	no	lysate
sp|P06746|DPOLB_HUMAN	POLB	1.10982	0.150321	no	lysate
sp|Q15831|STK11_HUMAN	STK11	1.10982	0.150321	no	lysate
sp|Q92870-4|APBB2_HUMAN	APBB2	1.10982	0.150321	no	lysate
sp|P37287|PIGA_HUMAN	PIGA	1.10982	0.150321	no	lysate
sp|O94953|KDM4B_HUMAN	KDM4B	1.10921	0.149532	no	lysate
tr|B4DLE8|B4DLE8_HUMAN	CRYBG3	1.10907	0.149357	no	lysate
sp|Q96MX3|ZNF48_HUMAN	ZNF48	1.10786	0.147779	no	lysate
sp|Q13191|CBLB_HUMAN	CBLB	1.10786	0.147779	no	lysate
sp|Q16706|MA2A1_HUMAN	MAN2A1	1.10725	0.146986	no	lysate
sp|Q92766-2|RREB1_HUMAN	RREB1	1.10725	0.146986	no	lysate
sp|Q5HYA8|MKS3_HUMAN	TMEM67	1.10664	0.146189	no	lysate
sp|O75369-8|FLNB_HUMAN	FLNB	1.1053	0.144444	no	lysate
sp|Q9NR30|DDX21_HUMAN	DDX21	1.1053	0.144444	no	lysate
sp|P06753|TPM3_HUMAN	TPM3	1.1053	0.144444	no	lysate
sp|Q12830|BPTF_HUMAN	BPTF	1.1053	0.144444	no	lysate
sp|O95372|LYPA2_HUMAN	LYPLA2	1.1053	0.144444	no	lysate
sp|O94760|DDAH1_HUMAN	DDAH1	1.1053	0.144444	no	lysate
sp|Q12797|ASPH_HUMAN	ASPH	1.1053	0.144444	no	lysate
sp|Q8N6H7|ARFG2_HUMAN	ARFGAP2	1.03521	0.0499183	no	lysate
sp|P07602|SAP_HUMAN	PSAP	1.1053	0.144444	no	lysate
sp|Q9H2C0|GAN_HUMAN	GAN	1.1053	0.144444	no	lysate
sp|Q96MM7-4|H6ST2_HUMAN	HS6ST2	1.1053	0.144444	no	lysate
sp|P53582|MAP11_HUMAN	METAP1	1.1053	0.144444	no	lysate
sp|Q96F44|TRI11_HUMAN	MIR6742	1.1053	0.144444	no	lysate
sp|Q9NVX2|NLE1_HUMAN	NLE1	1.1053	0.144444	no	lysate
sp|O15063|K0355_HUMAN	KIAA0355	1.1053	0.144444	no	lysate
sp|Q8WZ74|CTTB2_HUMAN	CTTNBP2	1.1053	0.144444	no	lysate
sp|Q9P0J7|KCMF1_HUMAN	KCMF1	1.1053	0.144444	no	lysate
sp|Q8N6L1-2|KTAP2_HUMAN	KRTCAP2	1.1053	0.144444	no	lysate
sp|Q16394|EXT1_HUMAN	EXT1	1.10398	0.142708	no	lysate
sp|Q86VZ5|SMS1_HUMAN	SGMS1	1.10398	0.142708	no	lysate
sp|Q9NZR1|TMOD2_HUMAN	TMOD2	1.10336	0.141906	no	lysate
sp|Q9BW62|KATL1_HUMAN	KATNAL1	1.10336	0.141906	no	lysate
sp|Q9H4G4|GAPR1_HUMAN	GLIPR2	1.10336	0.141906	no	lysate
sp|Q9NP66|HM20A_HUMAN	HMG20A	1.10336	0.141906	no	lysate
sp|Q9UGL1-2|KDM5B_HUMAN	KDM5B	1.06977	0.0972986	no	lysate
sp|Q9NPA8|ENY2_HUMAN	ENY2	1.10336	0.141906	no	lysate
sp|A1L3X0|ELOV7_HUMAN	ELOVL7	1.10336	0.141906	no	lysate
sp|O75386|TULP3_HUMAN	TULP3	1.10327	0.141783	no	lysate
sp|Q9BUH6|CI142_HUMAN	C9orf142	1.10275	0.1411	no	lysate
sp|Q8NFH5|NUP53_HUMAN	NUP35	1.10275	0.1411	no	lysate
sp|Q96BZ8|LENG1_HUMAN	LENG1	1.10275	0.1411	no	lysate
sp|Q96BW1|UPP_HUMAN	UPRT	1.10275	0.1411	no	lysate
sp|Q9NQ55-3|SSF1_HUMAN	PPAN	1.10275	0.1411	no	lysate
sp|O43657|TSN6_HUMAN	TSPAN6	1.10275	0.1411	no	lysate
sp|Q9NXR1|NDE1_HUMAN	MIR484	1.10213	0.140291	no	lysate
sp|Q8NE71|ABCF1_HUMAN	ABCF1	1.10081	0.138562	no	lysate
sp|O60832|DKC1_HUMAN	DKC1	1.10081	0.138562	no	lysate
sp|O14950|ML12B_HUMAN	MYL12B	1.10081	0.138562	no	lysate
sp|Q96PU5|NED4L_HUMAN	NEDD4L	1.10081	0.138562	no	lysate
sp|Q7Z3K3|POGZ_HUMAN	POGZ	1.10081	0.138562	no	lysate
sp|O60870|KIN17_HUMAN	KIN	1.10081	0.138562	no	lysate
sp|Q9P0V9-2|SEP10_HUMAN	42988	1.10081	0.138562	no	lysate
sp|Q96DC7-2|TMCO6_HUMAN	TMCO6	1.10081	0.138562	no	lysate
sp|Q02224|CENPE_HUMAN	CENPE	1.10081	0.138562	no	lysate
sp|O43854|EDIL3_HUMAN	EDIL3	1.10081	0.138562	no	lysate
sp|Q14562|DHX8_HUMAN	DHX8	1.10081	0.138562	no	lysate
sp|O00468-3|AGRIN_HUMAN	AGRN	1.10081	0.138562	no	lysate
sp|Q9BTF0|THUM2_HUMAN	THUMPD2	1.10081	0.138562	no	lysate
sp|Q8N131|PORIM_HUMAN	TMEM123	1.10081	0.138562	no	lysate
sp|Q9H2Y7|ZN106_HUMAN	ZNF106	1.10081	0.138562	no	lysate
sp|Q9Y2K5|R3HD2_HUMAN	R3HDM2	1.10081	0.138562	no	lysate
sp|P04004|VTNC_HUMAN	VTN	1.71606	0.779102	yes	lysate
sp|Q9H6L4|ARMC7_HUMAN	ARMC7	1.10081	0.138562	no	lysate
sp|Q6KCM7-3|SCMC2_HUMAN	SLC25A25	1.10081	0.138562	no	lysate
sp|Q8TBM8|DJB14_HUMAN	DNAJB14	1.10081	0.138562	no	lysate
tr|Q5JUV4|Q5JUV4_HUMAN	#N/A	1.10081	0.138562	no	lysate
sp|Q9BXI6|TB10A_HUMAN	TBC1D10A	1.10019	0.137749	no	lysate
sp|Q9Y664|KPTN_HUMAN	KPTN	1.10019	0.137749	no	lysate
sp|Q8N4A0|GALT4_HUMAN	GALNT4	1.10019	0.137749	no	lysate
sp|P32856|STX2_HUMAN	STX2	1.10012	0.137655	no	lysate
sp|O60518|RNBP6_HUMAN	RANBP6	1.10012	0.137655	no	lysate
sp|P07738|PMGE_HUMAN	BPGM	1.0995	0.136844	no	lysate
sp|Q8NBN3|TM87A_HUMAN	TMEM87A	1.09888	0.136029	no	lysate
sp|Q8NCC3|PAG15_HUMAN	PLA2G15	1.09888	0.136029	no	lysate
sp|Q9H098-2|F107B_HUMAN	FAM107B	1.09888	0.136029	no	lysate
sp|Q8IUH5|ZDH17_HUMAN	ZDHHC17	1.09888	0.136029	no	lysate
sp|Q9ULH1-2|ASAP1_HUMAN	ASAP1	1.09825	0.135211	no	lysate
sp|P41743|KPCI_HUMAN	PRKCI	1.09825	0.135211	no	lysate
sp|Q969G6|RIFK_HUMAN	RFK	1.09825	0.135211	no	lysate
sp|Q9NW15|ANO10_HUMAN	ANO10	1.09825	0.135211	no	lysate
sp|Q5BJF2|TMM97_HUMAN	TMEM97	1.09825	0.135211	no	lysate
sp|O95999|BCL10_HUMAN	BCL10	1.09825	0.135211	no	lysate
sp|P09234|RU1C_HUMAN	SNRPC	1.09825	0.135211	no	lysate
sp|P53814-6|SMTN_HUMAN	SMTN	1.09825	0.135211	no	lysate
sp|Q8TF76|HASP_HUMAN	GSG2	1.09825	0.135211	no	lysate
sp|Q8IY17-4|PLPL6_HUMAN	PNPLA6	1.09695	0.1335	no	lysate
sp|Q12929|EPS8_HUMAN	EPS8	1.09633	0.132678	no	lysate
sp|O60566-3|BUB1B_HUMAN	BUB1B	1.09633	0.132678	no	lysate
sp|Q9H4M9|EHD1_HUMAN	EHD1	1.09633	0.132678	no	lysate
sp|P61978-3|HNRPK_HUMAN	HNRNPK	1.09633	0.132678	no	lysate
sp|O43491|E41L2_HUMAN	EPB41L2	1.09633	0.132678	no	lysate
sp|Q12905|ILF2_HUMAN	ILF2	1.09633	0.132678	no	lysate
sp|P42696|RBM34_HUMAN	RBM34	1.09633	0.132678	no	lysate
sp|Q93052|LPP_HUMAN	LPP	1.09633	0.132678	no	lysate
sp|Q9NX70|MED29_HUMAN	MED29	1.09633	0.132678	no	lysate
sp|P78332|RBM6_HUMAN	RBM6	1.09633	0.132678	no	lysate
sp|Q99471|PFD5_HUMAN	PFDN5	1.09633	0.132678	no	lysate
sp|Q9UFG5-2|CS025_HUMAN	C19orf25	1.09633	0.132678	no	lysate
sp|O95503|CBX6_HUMAN	CBX6	1.09633	0.132678	no	lysate
sp|Q96GV9|CE030_HUMAN	C5orf30	1.09633	0.132678	no	lysate
sp|P34931|HS71L_HUMAN	HSPA1L	1.09633	0.132678	no	lysate
sp|Q96BQ5|CC127_HUMAN	CCDC127	1.09633	0.132678	no	lysate
sp|A8MT69|CENPX_HUMAN	MHF2	1.09633	0.132678	no	lysate
sp|P29320|EPHA3_HUMAN	EPHA3	1.09633	0.132678	no	lysate
sp|Q9P270|SLAI2_HUMAN	SLAIN2	1.0957	0.131852	no	lysate
sp|Q02447|SP3_HUMAN	SP3	1.0957	0.131852	no	lysate
sp|Q5T0W9|FA83B_HUMAN	FAM83B	1.0957	0.131852	no	lysate
sp|P35754|GLRX1_HUMAN	GLRX	1.0957	0.131852	no	lysate
sp|A3KN83-2|SBNO1_HUMAN	MIR8072	1.09507	0.131023	no	lysate
sp|Q9H9S5|FKRP_HUMAN	FKRP	1.09503	0.130976	no	lysate
sp|Q9UHA4|LTOR3_HUMAN	LAMTOR3	1.09441	0.130149	no	lysate
sp|P56945-6|BCAR1_HUMAN	BCAR1	1.09378	0.129319	no	lysate
sp|Q12788|TBL3_HUMAN	TBL3	1.09378	0.129319	no	lysate
sp|Q8IZ07|AN13A_HUMAN	ANKRD13A	1.09378	0.129319	no	lysate
sp|Q8WYP5-2|ELYS_HUMAN	AHCTF1	1.09378	0.129319	no	lysate
sp|Q9BRZ2|TRI56_HUMAN	TRIM56	1.09378	0.129319	no	lysate
sp|Q14847|LASP1_HUMAN	LASP1	1.09378	0.129319	no	lysate
sp|Q15599|NHRF2_HUMAN	SLC9A3R2	1.09378	0.129319	no	lysate
sp|Q4KMQ2-2|ANO6_HUMAN	ANO6	1.09378	0.129319	no	lysate
sp|Q9Y2Y1|RPC10_HUMAN	POLR3K	1.09378	0.129319	no	lysate
tr|Q5SU54|Q5SU54_HUMAN	#N/A	1.09378	0.129319	no	lysate
sp|O75478|TAD2A_HUMAN	TADA2A	1.09378	0.129319	no	lysate
sp|A0JLT2|MED19_HUMAN	MED19	1.09378	0.129319	no	lysate
sp|Q9NS18-2|GLRX2_HUMAN	GLRX2	1.09378	0.129319	no	lysate
sp|Q14677|EPN4_HUMAN	CLINT1	1.09315	0.128485	no	lysate
sp|Q86U42|PABP2_HUMAN	PABPN1	1.09249	0.127625	no	lysate
sp|Q9HCD6-2|TANC2_HUMAN	TANC2	1.09249	0.127625	no	lysate
sp|Q15059|BRD3_HUMAN	BRD3	1.09186	0.12679	no	lysate
sp|Q92879-4|CELF1_HUMAN	CELF1	1.09186	0.12679	no	lysate
sp|Q13217|DNJC3_HUMAN	DNAJC3	1.09186	0.12679	no	lysate
sp|P61421|VA0D1_HUMAN	ATP6V0D1	1.09186	0.12679	no	lysate
sp|Q53H47|SETMR_HUMAN	SETMAR	1.09186	0.12679	no	lysate
sp|Q8WXA9-2|SREK1_HUMAN	SREK1	1.09186	0.12679	no	lysate
sp|O15270|SPTC2_HUMAN	SPTLC2	1.09186	0.12679	no	lysate
sp|Q14669-2|TRIPC_HUMAN	TRIP12	1.09186	0.12679	no	lysate
sp|P13693|TCTP_HUMAN	TPT1	1.09186	0.12679	no	lysate
sp|O15234|CASC3_HUMAN	CASC3	1.09186	0.12679	no	lysate
sp|Q9NPR9|GP108_HUMAN	GPR108	1.09186	0.12679	no	lysate
sp|P51955|NEK2_HUMAN	NEK2	1.09186	0.12679	no	lysate
sp|Q9BW91|NUDT9_HUMAN	NUDT9	1.09186	0.12679	no	lysate
sp|Q9UKK3|PARP4_HUMAN	PARP4	1.09186	0.12679	no	lysate
sp|Q9H6R7|CB044_HUMAN	WDCP	1.09186	0.12679	no	lysate
sp|O15392|BIRC5_HUMAN	BIRC5	1.09186	0.12679	no	lysate
sp|Q3B726|RPA43_HUMAN	TWISTNB	1.09186	0.12679	no	lysate
tr|M0QZM1|M0QZM1_HUMAN	#N/A	1.09186	0.12679	no	lysate
sp|Q9NZ43|USE1_HUMAN	USE1	1.09186	0.12679	no	lysate
sp|Q7Z4L5|TT21B_HUMAN	TTC21B	1.09186	0.12679	no	lysate
sp|Q9UKA4|AKA11_HUMAN	AKAP11	1.09186	0.12679	no	lysate
sp|Q8NCG7|DGLB_HUMAN	DAGLB	1.09186	0.12679	no	lysate
sp|Q8IX15|HOMEZ_HUMAN	HOMEZ	1.09186	0.12679	no	lysate
sp|O76082-3|S22A5_HUMAN	SLC22A5	1.09186	0.12679	no	lysate
sp|Q9Y657|SPIN1_HUMAN	SPIN1	1.09123	0.125952	no	lysate
sp|Q96EZ8-2|MCRS1_HUMAN	MCRS1	1.09123	0.125952	no	lysate
sp|Q9NYL9|TMOD3_HUMAN	TMOD3	1.08995	0.124266	no	lysate
sp|Q9UPM8|AP4E1_HUMAN	AP4E1	1.08995	0.124266	no	lysate
sp|Q96AT1|K1143_HUMAN	KIAA1143	1.08995	0.124266	no	lysate
sp|O15078|CE290_HUMAN	CEP290	1.08995	0.124266	no	lysate
sp|Q9H5K3|SG196_HUMAN	POMK	1.08995	0.124266	no	lysate
sp|Q9ULD2|MTUS1_HUMAN	MTUS1	1.08995	0.124266	no	lysate
sp|Q9H0V9-2|LMA2L_HUMAN	LMAN2L	1.08995	0.124266	no	lysate
sp|Q9BS16|CENPK_HUMAN	CENPK	1.08995	0.124266	no	lysate
sp|Q9UQR1|ZN148_HUMAN	ZNF148	1.08932	0.123423	no	lysate
sp|P52594-4|AGFG1_HUMAN	AGFG1	1.08932	0.123423	no	lysate
sp|Q96S59|RANB9_HUMAN	RANBP9	1.08932	0.123423	no	lysate
sp|Q8IW50|F219A_HUMAN	FAM219A	1.08932	0.123423	no	lysate
sp|Q92543|SNX19_HUMAN	SNX19	1.08932	0.123423	no	lysate
sp|Q9H2H9|S38A1_HUMAN	SLC38A1	1.08932	0.123423	no	lysate
sp|Q15468-2|STIL_HUMAN	STIL	1.08804	0.121728	no	lysate
sp|Q15149-2|PLEC_HUMAN	PLEC	1.08741	0.120899	no	lysate
sp|Q15004|PAF15_HUMAN	KIAA0101	1.08741	0.120899	no	lysate
sp|P82094-2|TMF1_HUMAN	TMF1	1.08741	0.120899	no	lysate
sp|O60925|PFD1_HUMAN	PFDN1	1.08741	0.120899	no	lysate
sp|P16278|BGAL_HUMAN	GLB1	1.08741	0.120899	no	lysate
sp|Q14651|PLSI_HUMAN	PLS1	1.08741	0.120899	no	lysate
sp|Q13206|DDX10_HUMAN	DDX10	1.08741	0.120899	no	lysate
sp|P19525|E2AK2_HUMAN	EIF2AK2	1.08741	0.120899	no	lysate
sp|Q6GMV3|PTRD1_HUMAN	PTRHD1	1.08741	0.120899	no	lysate
sp|Q9NQS7|INCE_HUMAN	INCENP	1.08741	0.120899	no	lysate
sp|O60701|UGDH_HUMAN	UGDH	1.08741	0.120899	no	lysate
sp|Q15165|PON2_HUMAN	PON2	1.08741	0.120899	no	lysate
sp|P62256|UBE2H_HUMAN	UBE2H	1.08741	0.120899	no	lysate
sp|Q9H553|ALG2_HUMAN	ALG2	1.08741	0.120899	no	lysate
sp|P26583|HMGB2_HUMAN	HMGB2	1.08741	0.120899	no	lysate
sp|Q15532|SSXT_HUMAN	SS18	1.08741	0.120899	no	lysate
sp|Q7L5Y1-4|ENOF1_HUMAN	ENOSF1	1.08741	0.120899	no	lysate
sp|Q70CQ3|UBP30_HUMAN	USP30	1.08741	0.120899	no	lysate
sp|Q96IW7|SC22A_HUMAN	SEC22A	1.08741	0.120899	no	lysate
sp|Q9NR77|PXMP2_HUMAN	PXMP2	1.08741	0.120899	no	lysate
sp|O60347|TBC12_HUMAN	TBC1D12	1.08741	0.120899	no	lysate
sp|Q96NL6|SCLT1_HUMAN	SCLT1	1.08679	0.120078	no	lysate
sp|P19474|RO52_HUMAN	TRIM21	1.08677	0.120049	no	lysate
sp|Q16851|UGPA_HUMAN	UGP2	1.08551	0.118379	no	lysate
sp|O75063|XYLK_HUMAN	FAM20B	1.08551	0.118379	no	lysate
sp|Q1MSJ5|CSPP1_HUMAN	CSPP1	1.08551	0.118379	no	lysate
sp|Q9Y2K2|SIK3_HUMAN	SIK3	1.08551	0.118379	no	lysate
sp|Q5T3J3|LRIF1_HUMAN	LRIF1	1.08551	0.118379	no	lysate
sp|Q9HBL7|PLRKT_HUMAN	PLGRKT	1.08487	0.117524	no	lysate
sp|Q16629|SRSF7_HUMAN	SRSF7	1.08487	0.117524	no	lysate
sp|Q96MF7|NSE2_HUMAN	NSMCE2	1.08487	0.117524	no	lysate
sp|Q9NQ86|TRI36_HUMAN	TRIM36	1.08487	0.117524	no	lysate
sp|Q6ZNB6|NFXL1_HUMAN	NFXL1	1.08487	0.117524	no	lysate
sp|Q9UKB3|DJC12_HUMAN	DNAJC12	1.08487	0.117524	no	lysate
sp|Q5H8A4|PIGG_HUMAN	PIGG	1.08362	0.115863	no	lysate
sp|Q9HAW4|CLSPN_HUMAN	CLSPN	1.08298	0.115004	no	lysate
sp|O00567|NOP56_HUMAN	MIR1292	1.08298	0.115004	no	lysate
tr|E7EQT4|E7EQT4_HUMAN	#N/A	1.08298	0.115004	no	lysate
sp|Q8IWC1|MA7D3_HUMAN	MAP7D3	1.08298	0.115004	no	lysate
sp|Q9BRP1|PDD2L_HUMAN	PDCD2L	1.08298	0.115004	no	lysate
sp|Q99584|S10AD_HUMAN	S100A13	1.08298	0.115004	no	lysate
tr|E9PCW1|E9PCW1_HUMAN	#N/A	1.08298	0.115004	no	lysate
sp|Q8N3J3|CQ053_HUMAN	C17orf53	1.08298	0.115004	no	lysate
sp|Q96GQ5|CP058_HUMAN	C16orf58	1.08298	0.115004	no	lysate
tr|D6RDK6|D6RDK6_HUMAN	#N/A	1.08298	0.115004	no	lysate
sp|Q8N128-2|F177A_HUMAN	FAM177A1	1.08298	0.115004	no	lysate
sp|Q9H825|METL8_HUMAN	METTL8	1.08298	0.115004	no	lysate
sp|O43493|TGON2_HUMAN	TGOLN2	1.08298	0.115004	no	lysate
sp|P10619|PPGB_HUMAN	CTSA	1.08298	0.115004	no	lysate
sp|Q8N960|CE120_HUMAN	CEP120	1.08298	0.115004	no	lysate
sp|Q9NW81-4|AT5SL_HUMAN	ATP5SL	1.08298	0.115004	no	lysate
sp|Q96QB1|RHG07_HUMAN	DLC1	1.08298	0.115004	no	lysate
sp|Q70IA6-3|MOB2_HUMAN	MOB2	1.08298	0.115004	no	lysate
sp|Q6ZMK1|CYHR1_HUMAN	CYHR1	1.08298	0.115004	no	lysate
sp|P55199|ELL_HUMAN	ELL	1.08233	0.114141	no	lysate
sp|O14640|DVL1_HUMAN	DVL1	1.08174	0.113352	no	lysate
sp|Q93050|VPP1_HUMAN	ATP6V0A1	1.08109	0.112489	no	lysate
sp|P52788|SPSY_HUMAN	SMS	1.08109	0.112489	no	lysate
sp|Q9H4A5|GLP3L_HUMAN	GOLPH3L	1.08109	0.112489	no	lysate
sp|A8CG34|P121C_HUMAN	POM121C	1.08109	0.112489	no	lysate
sp|Q9Y4C8|RBM19_HUMAN	RBM19	1.08109	0.112489	no	lysate
sp|Q6UX53|MET7B_HUMAN	METTL7B	1.08109	0.112489	no	lysate
sp|Q01081|U2AF1_HUMAN	U2AF1	1.08109	0.112489	no	lysate
sp|Q96SQ9-2|CP2S1_HUMAN	CYP2S1	1.08109	0.112489	no	lysate
sp|O75446|SAP30_HUMAN	SAP30	1.08109	0.112489	no	lysate
sp|Q96HI0|SENP5_HUMAN	SENP5	1.08109	0.112489	no	lysate
sp|Q96B97|SH3K1_HUMAN	SH3KBP1	1.08044	0.111621	no	lysate
sp|Q9NR12|PDLI7_HUMAN	PDLIM7	1.08044	0.111621	no	lysate
sp|Q9NP72|RAB18_HUMAN	RAB18	1.08044	0.111621	no	lysate
sp|Q92782-2|DPF1_HUMAN	DPF1	1.08044	0.111621	no	lysate
sp|Q6NX49|ZN544_HUMAN	ZNF544	1.08044	0.111621	no	lysate
sp|Q9UPS8-3|ANR26_HUMAN	ANKRD26	1.08044	0.111621	no	lysate
sp|Q8IYL3|CA174_HUMAN	C1orf174	1.08044	0.111621	no	lysate
sp|Q9UGC7|RF1ML_HUMAN	MTRF1L	1.07921	0.109977	no	lysate
sp|Q7Z406-6|MYH14_HUMAN	MYH14	1.07856	0.109106	no	lysate
sp|P17655|CAN2_HUMAN	CAPN2	1.07856	0.109106	no	lysate
tr|F8VRH0|F8VRH0_HUMAN	#N/A	1.12345	0.167936	no	lysate
sp|P14649|MYL6B_HUMAN	MYL6B	1.07856	0.109106	no	lysate
sp|Q12765-2|SCRN1_HUMAN	SCRN1	1.07856	0.109106	no	lysate
sp|Q96G23|CERS2_HUMAN	CERS2	1.07856	0.109106	no	lysate
sp|Q96IZ0|PAWR_HUMAN	PAWR	1.07856	0.109106	no	lysate
sp|P22087|FBRL_HUMAN	FBL	1.07856	0.109106	no	lysate
sp|Q6P2H3|CEP85_HUMAN	CEP85	1.07856	0.109106	no	lysate
sp|Q9UL25|RAB21_HUMAN	RAB21	1.07856	0.109106	no	lysate
sp|Q9Y305-4|ACOT9_HUMAN	ACOT9	1.07856	0.109106	no	lysate
sp|Q9NWM8|FKB14_HUMAN	FKBP14	1.07856	0.109106	no	lysate
sp|A0AV96|RBM47_HUMAN	RBM47	1.07856	0.109106	no	lysate
sp|Q8IWA4|MFN1_HUMAN	MFN1	1.07856	0.109106	no	lysate
sp|O00443|P3C2A_HUMAN	PIK3C2A	1.07856	0.109106	no	lysate
sp|Q86X52|CHSS1_HUMAN	CHSY1	1.07856	0.109106	no	lysate
sp|P51452|DUS3_HUMAN	DUSP3	1.07856	0.109106	no	lysate
sp|P05556|ITB1_HUMAN	ITGB1	1.07856	0.109106	no	lysate
sp|Q8TBA6|GOGA5_HUMAN	GOLGA5	1.07856	0.109106	no	lysate
sp|Q96BI3|APH1A_HUMAN	APH1A	1.07856	0.109106	no	lysate
sp|Q8NA72|POC5_HUMAN	POC5	1.07856	0.109106	no	lysate
sp|Q6ZUT9-2|DEN5B_HUMAN	DENND5B	1.07856	0.109106	no	lysate
sp|P51790-2|CLCN3_HUMAN	CLCN3	1.07856	0.109106	no	lysate
sp|Q9UHF1|EGFL7_HUMAN	EGFL7	1.07856	0.109106	no	lysate
sp|Q8IYN0|ZN100_HUMAN	ZNF100	1.07725	0.107352	no	lysate
sp|Q96BK5|PINX1_HUMAN	PINX1	1.07668	0.106595	no	lysate
sp|Q9Y3D8|KAD6_HUMAN	AK6	1.07668	0.106595	no	lysate
sp|O43896|KIF1C_HUMAN	KIF1C	1.07668	0.106595	no	lysate
sp|Q7Z7C8-2|TAF8_HUMAN	TAF8	1.07668	0.106595	no	lysate
sp|Q8N5G2|MACOI_HUMAN	TMEM57	1.07668	0.106595	no	lysate
sp|Q5JS37|NHLC3_HUMAN	NHLRC3	1.07668	0.106595	no	lysate
sp|Q9Y385|UB2J1_HUMAN	UBE2J1	1.07603	0.105715	no	lysate
sp|Q3B7T1|EDRF1_HUMAN	EDRF1	1.07603	0.105715	no	lysate
sp|Q07666|KHDR1_HUMAN	KHDRBS1	1.07603	0.105715	no	lysate
sp|Q96KQ7|EHMT2_HUMAN	EHMT2	1.07603	0.105715	no	lysate
sp|Q96JN8|NEUL4_HUMAN	NEURL4	1.07603	0.105715	no	lysate
sp|Q6PH81|CP087_HUMAN	C16orf87	1.07603	0.105715	no	lysate
sp|Q9Y508|RN114_HUMAN	RNF114	1.07603	0.105715	no	lysate
sp|Q15796|SMAD2_HUMAN	SMAD2	1.07603	0.105715	no	lysate
sp|Q6ZT21|TMPPE_HUMAN	TMPPE	1.07603	0.105715	no	lysate
sp|Q86YP4-3|P66A_HUMAN	GATAD2A	1.07416	0.103204	no	lysate
sp|Q9H223|EHD4_HUMAN	EHD4	1.07416	0.103204	no	lysate
sp|Q9H6T3|RPAP3_HUMAN	RPAP3	1.07416	0.103204	no	lysate
sp|P55010|IF5_HUMAN	EIF5	1.07416	0.103204	no	lysate
sp|P78316|NOP14_HUMAN	NOP14	1.07416	0.103204	no	lysate
sp|P39656|OST48_HUMAN	DDOST	1.07416	0.103204	no	lysate
sp|Q9H6R4|NOL6_HUMAN	NOL6	1.07416	0.103204	no	lysate
sp|P50552|VASP_HUMAN	VASP	1.07416	0.103204	no	lysate
sp|O14521|DHSD_HUMAN	SDHD	1.07416	0.103204	no	lysate
sp|Q86V21|AACS_HUMAN	AACS	1.07416	0.103204	no	lysate
sp|Q69YH5|CDCA2_HUMAN	CDCA2	1.07416	0.103204	no	lysate
sp|O00469-2|PLOD2_HUMAN	PLOD2	1.07416	0.103204	no	lysate
sp|Q9NRX1|PNO1_HUMAN	PNO1	1.07416	0.103204	no	lysate
sp|Q9P0V3|SH3B4_HUMAN	SH3BP4	1.07416	0.103204	no	lysate
sp|Q6ZVM7|TM1L2_HUMAN	TOM1L2	1.07416	0.103204	no	lysate
sp|P24386|RAE1_HUMAN	CHM	1.07416	0.103204	no	lysate
sp|Q9NZM3|ITSN2_HUMAN	ITSN2	1.07416	0.103204	no	lysate
sp|P60510|PP4C_HUMAN	PPP4C	1.07416	0.103204	no	lysate
sp|Q13427|PPIG_HUMAN	PPIG	1.11691	0.159517	no	lysate
sp|Q9NX07|TSAP1_HUMAN	TRNAU1AP	1.07416	0.103204	no	lysate
sp|Q96N11|CG026_HUMAN	C7orf26	1.07416	0.103204	no	lysate
sp|Q9NUN5|LMBD1_HUMAN	LMBRD1	1.07416	0.103204	no	lysate
sp|O75882|ATRN_HUMAN	ATRN	1.07416	0.103204	no	lysate
sp|P07948|LYN_HUMAN	LYN	1.07416	0.103204	no	lysate
sp|Q03112-3|EVI1_HUMAN	MECOM	1.07416	0.103204	no	lysate
sp|Q9H8T0-2|AKTIP_HUMAN	AKTIP	1.07416	0.103204	no	lysate
sp|P42568|AF9_HUMAN	MLLT3	1.07416	0.103204	no	lysate
sp|Q4ZIN3|MBRL_HUMAN	TMEM259	1.07416	0.103204	no	lysate
sp|Q15652|JHD2C_HUMAN	JMJD1C	1.07416	0.103204	no	lysate
sp|P43694|GATA4_HUMAN	GATA4	1.07416	0.103204	no	lysate
sp|Q8N655|CJ012_HUMAN	LCOR	1.07416	0.103204	no	lysate
sp|O75064|DEN4B_HUMAN	DENND4B	1.07416	0.103204	no	lysate
sp|P49760|CLK2_HUMAN	CLK2	1.07416	0.103204	no	lysate
sp|Q96I36|COX14_HUMAN	COX14	1.07416	0.103204	no	lysate
sp|Q86WP2-2|GPBP1_HUMAN	GPBP1	1.0735	0.102317	no	lysate
sp|Q9H8W3|F204A_HUMAN	FAM204A	1.0735	0.102317	no	lysate
sp|O00273|DFFA_HUMAN	DFFA	1.07229	0.100697	no	lysate
sp|Q9BV40|VAMP8_HUMAN	VAMP8	1.04806	0.0677153	no	lysate
sp|Q5SVS4|KMCP1_HUMAN	SLC25A30	1.07229	0.100697	no	lysate
sp|P25440-2|BRD2_HUMAN	BRD2	1.07163	0.0998055	no	lysate
sp|Q9H5V9|CX056_HUMAN	CXorf56	1.07163	0.0998055	no	lysate
sp|Q15545|TAF7_HUMAN	TAF7	1.07163	0.0998055	no	lysate
sp|Q4VC31|CCD58_HUMAN	CCDC58	1.07163	0.0998055	no	lysate
sp|Q7RTV0|PHF5A_HUMAN	PHF5A	1.07163	0.0998055	no	lysate
sp|O94811|TPPP_HUMAN	TPPP	1.0711	0.0990871	no	lysate
sp|Q3L8U1|CHD9_HUMAN	CHD9	1.07043	0.0981947	no	lysate
sp|O95551-2|TYDP2_HUMAN	TDP2	1.06977	0.0972986	no	lysate
sp|Q86UP2|KTN1_HUMAN	KTN1	1.06977	0.0972986	no	lysate
sp|P30622-2|CLIP1_HUMAN	CLIP1	1.06977	0.0972986	no	lysate
sp|Q86WX3|AROS_HUMAN	RPS19BP1	1.06977	0.0972986	no	lysate
sp|O15514|RPB4_HUMAN	POLR2D	1.06977	0.0972986	no	lysate
sp|Q15555|MARE2_HUMAN	MAPRE2	1.06977	0.0972986	no	lysate
sp|O75718|CRTAP_HUMAN	CRTAP	1.06977	0.0972986	no	lysate
sp|Q8NF91|SYNE1_HUMAN	SYNE1	1.06977	0.0972986	no	lysate
sp|P32189|GLPK_HUMAN	GK	1.06977	0.0972986	no	lysate
sp|P08670|VIME_HUMAN	VIM	1.06977	0.0972986	no	lysate
sp|Q9ULW0|TPX2_HUMAN	TPX2	1.06977	0.0972986	no	lysate
sp|O00400|ACATN_HUMAN	SLC33A1	1.06977	0.0972986	no	lysate
sp|Q9BZQ8|NIBAN_HUMAN	FAM129A	1.06977	0.0972986	no	lysate
sp|Q07955-2|SRSF1_HUMAN	SRSF1	1.06977	0.0972986	no	lysate
sp|Q15398|DLGP5_HUMAN	DLGAP5	1.06977	0.0972986	no	lysate
tr|H0Y459|H0Y459_HUMAN	#N/A	1.33077	0.412264	yes	lysate
sp|Q9BWT6|MND1_HUMAN	MND1	1.06977	0.0972986	no	lysate
sp|Q6GMV2|SMYD5_HUMAN	SMYD5	1.06977	0.0972986	no	lysate
sp|Q92508|PIEZ1_HUMAN	MIR4722	1.06977	0.0972986	no	lysate
sp|Q00587|BORG5_HUMAN	CDC42EP1	1.06977	0.0972986	no	lysate
sp|Q9UGH3|S23A2_HUMAN	SLC23A2	1.06977	0.0972986	no	lysate
sp|O95817|BAG3_HUMAN	BAG3	1.06977	0.0972986	no	lysate
sp|Q9NPF5|DMAP1_HUMAN	DMAP1	1.06977	0.0972986	no	lysate
sp|Q9BT09|CNPY3_HUMAN	CNPY3	1.06977	0.0972986	no	lysate
sp|Q9H2V7|SPNS1_HUMAN	SPNS1	1.06977	0.0972986	no	lysate
sp|Q9BY50|SC11C_HUMAN	SEC11C	1.06977	0.0972986	no	lysate
sp|Q9Y4F5|C170B_HUMAN	CEP170B	1.06977	0.0972986	no	lysate
sp|Q9BRL6|SRSF8_HUMAN	SRSF8	1.06977	0.0972986	no	lysate
sp|Q9NRG4|SMYD2_HUMAN	SMYD2	1.06977	0.0972986	no	lysate
sp|Q9UBI9|HDC_HUMAN	HECA	1.06977	0.0972986	no	lysate
sp|Q9NZ72|STMN3_HUMAN	STMN3	1.06977	0.0972986	no	lysate
sp|Q9HD15|SRA1_HUMAN	SRA1	1.06977	0.0972986	no	lysate
sp|Q9P0S2|COX16_HUMAN	COX16	1.06977	0.0972986	no	lysate
sp|Q96AG3|S2546_HUMAN	SLC25A46	1.06977	0.0972986	no	lysate
sp|Q6PGQ7|BORA_HUMAN	BORA	1.06977	0.0972986	no	lysate
sp|Q9P021|CRIPT_HUMAN	CRIPT	1.06977	0.0972986	no	lysate
sp|Q9P2L0|WDR35_HUMAN	WDR35	1.06977	0.0972986	no	lysate
sp|Q92859|NEO1_HUMAN	NEO1	1.06977	0.0972986	no	lysate
sp|Q7L1V2|MON1B_HUMAN	MON1B	1.0691	0.0963989	no	lysate
sp|Q92903|CDS1_HUMAN	CDS1	1.06858	0.0956965	no	lysate
sp|O95067|CCNB2_HUMAN	CCNB2	1.06791	0.0947961	no	lysate
sp|Q8NAT1|PMGT2_HUMAN	POMGNT2	1.06791	0.0947961	no	lysate
sp|Q9UJF2|NGAP_HUMAN	RASAL2	1.06791	0.0947961	no	lysate
sp|Q5VWG9|TAF3_HUMAN	TAF3	1.06791	0.0947961	no	lysate
sp|Q9Y2G8|DJC16_HUMAN	DNAJC16	1.06791	0.0947961	no	lysate
sp|Q9UJZ1|STML2_HUMAN	STOML2	1.02249	0.0320845	no	lysate
sp|Q9BUN8|DERL1_HUMAN	DERL1	1.06791	0.0947961	no	lysate
sp|Q8NBZ7-2|UXS1_HUMAN	UXS1	1.06791	0.0947961	no	lysate
sp|Q9H0W5|CCDC8_HUMAN	CCDC8	1.06791	0.0947961	no	lysate
sp|Q92968|PEX13_HUMAN	PEX13	1.06791	0.0947961	no	lysate
sp|P62491|RB11A_HUMAN	RAB11A	1.06791	0.0947961	no	lysate
sp|Q8NEC7|GSTCD_HUMAN	GSTCD	1.06791	0.0947961	no	lysate
sp|Q9ULH0|KDIS_HUMAN	KIDINS220	1.06725	0.093892	no	lysate
sp|O75787|RENR_HUMAN	ATP6AP2	1.06725	0.093892	no	lysate
sp|P42224|STAT1_HUMAN	STAT1	1.06725	0.093892	no	lysate
sp|Q16543|CDC37_HUMAN	CDC37	1.06725	0.093892	no	lysate
sp|Q96FZ7|CHMP6_HUMAN	CHMP6	1.06725	0.093892	no	lysate
sp|Q86V85|GP180_HUMAN	GPR180	1.06725	0.093892	no	lysate
sp|Q9Y5T5|UBP16_HUMAN	USP16	1.06725	0.093892	no	lysate
sp|Q9H6E4|CC134_HUMAN	CCDC134	1.06725	0.093892	no	lysate
sp|P50895|BCAM_HUMAN	BCAM	1.06657	0.0929842	no	lysate
sp|Q68DQ2|CRBG3_HUMAN	CRYBG3	1.06657	0.0929842	no	lysate
sp|Q9NYJ8|TAB2_HUMAN	TAB2	1.06657	0.0929842	no	lysate
sp|Q9UMX1|SUFU_HUMAN	SUFU	1.06607	0.092298	no	lysate
sp|Q9GZU8|F192A_HUMAN	FAM192A	1.06607	0.092298	no	lysate
sp|O95613|PCNT_HUMAN	PCNT	1.0654	0.0913895	no	lysate
sp|Q9GZR7|DDX24_HUMAN	DDX24	1.0654	0.0913895	no	lysate
sp|O75116|ROCK2_HUMAN	ROCK2	1.0654	0.0913895	no	lysate
sp|Q92598|HS105_HUMAN	HSPH1	1.0654	0.0913895	no	lysate
sp|Q9UDY2|ZO2_HUMAN	ENSG00000283143	1.0654	0.0913895	no	lysate
sp|Q9P2D1|CHD7_HUMAN	CHD7	1.0654	0.0913895	no	lysate
sp|O43716|GATC_HUMAN	GATC	1.0654	0.0913895	no	lysate
sp|Q7L2E3-2|DHX30_HUMAN	DHX30	1.0654	0.0913895	no	lysate
sp|Q7L4I2|RSRC2_HUMAN	RSRC2	1.0654	0.0913895	no	lysate
sp|Q16352|AINX_HUMAN	INA	1.0654	0.0913895	no	lysate
sp|Q16881|TRXR1_HUMAN	TXNRD1	1.0654	0.0913895	no	lysate
sp|Q9Y314|NOSIP_HUMAN	NOSIP	1.0654	0.0913895	no	lysate
tr|E7ETA6|E7ETA6_HUMAN	#N/A	1.0654	0.0913895	no	lysate
sp|Q12849|GRSF1_HUMAN	GRSF1	1.0654	0.0913895	no	lysate
sp|O00303|EIF3F_HUMAN	EIF3F	1.0654	0.0913895	no	lysate
sp|Q14696|MESD_HUMAN	MESDC2	1.0654	0.0913895	no	lysate
sp|O00264|PGRC1_HUMAN	PGRMC1	1.0654	0.0913895	no	lysate
sp|O00161|SNP23_HUMAN	SNAP23	1.0654	0.0913895	no	lysate
sp|Q9ULX6|AKP8L_HUMAN	AKAP8L	1.0654	0.0913895	no	lysate
sp|Q5JTV8|TOIP1_HUMAN	TOR1AIP1	1.0654	0.0913895	no	lysate
tr|E9PF99|E9PF99_HUMAN	CEP192	1.0654	0.0913895	no	lysate
sp|Q13137-4|CACO2_HUMAN	CALCOCO2	1.0654	0.0913895	no	lysate
tr|H7BZ48|H7BZ48_HUMAN	#N/A	1.12803	0.173802	no	lysate
sp|Q8TDN6|BRX1_HUMAN	BRIX1	1.0654	0.0913895	no	lysate
sp|Q969M3-3|YIPF5_HUMAN	YIPF5	1.0654	0.0913895	no	lysate
sp|O60346|PHLP1_HUMAN	PHLPP1	1.0654	0.0913895	no	lysate
sp|Q8TEW0|PARD3_HUMAN	PARD3	1.0654	0.0913895	no	lysate
sp|Q9P031|TAP26_HUMAN	CCDC59	1.0654	0.0913895	no	lysate
sp|Q9BQ67|GRWD1_HUMAN	GRWD1	1.0654	0.0913895	no	lysate
sp|Q9UHK0|NUFP1_HUMAN	NUFIP1	1.0654	0.0913895	no	lysate
sp|P61009|SPCS3_HUMAN	SPCS3	1.0654	0.0913895	no	lysate
sp|Q9Y2D8|ADIP_HUMAN	SSX2IP	1.0654	0.0913895	no	lysate
sp|P52803|EFNA5_HUMAN	EFNA5	1.0654	0.0913895	no	lysate
sp|P55197|AF10_HUMAN	MLLT10	1.0654	0.0913895	no	lysate
sp|Q96AQ8|MCUR1_HUMAN	MCUR1	1.0654	0.0913895	no	lysate
sp|Q9P2C4|TM181_HUMAN	TMEM181	1.0654	0.0913895	no	lysate
sp|Q9NX05|F120C_HUMAN	FAM120C	1.0654	0.0913895	no	lysate
sp|Q9BWH2|FUND2_HUMAN	FUNDC2	1.0654	0.0913895	no	lysate
sp|P12036|NFH_HUMAN	NEFH	1.0654	0.0913895	no	lysate
sp|Q7Z422|SZRD1_HUMAN	SZRD1	1.0654	0.0913895	no	lysate
sp|Q9H8M1|CQ10B_HUMAN	COQ10B	1.0654	0.0913895	no	lysate
sp|Q5NDL2|EOGT_HUMAN	EOGT	1.0654	0.0913895	no	lysate
sp|Q9NRC1|ST7_HUMAN	MIR6132	1.0654	0.0913895	no	lysate
sp|Q8WXX7|AUTS2_HUMAN	AUTS2	1.0654	0.0913895	no	lysate
sp|O75438-2|NDUB1_HUMAN	NDUFB1	1.06472	0.0904774	no	lysate
sp|P26374|RAE2_HUMAN	CHML	1.06355	0.0888914	no	lysate
sp|Q9P275-2|UBP36_HUMAN	USP36	1.06355	0.0888914	no	lysate
sp|O00488|ZN593_HUMAN	ZNF593	1.06355	0.0888914	no	lysate
sp|O60443|DFNA5_HUMAN	DFNA5	1.06355	0.0888914	no	lysate
sp|P11166|GTR1_HUMAN	SLC2A1	1.06355	0.0888914	no	lysate
sp|Q00534|CDK6_HUMAN	CDK6	1.06355	0.0888914	no	lysate
sp|Q9BST9|RTKN_HUMAN	RTKN	1.06355	0.0888914	no	lysate
sp|Q9Y3R0|GRIP1_HUMAN	GRIP1	1.06355	0.0888914	no	lysate
sp|Q86XZ4|SPAS2_HUMAN	SPATS2	1.06355	0.0888914	no	lysate
sp|Q9NYA4|MTMR4_HUMAN	MTMR4	1.06355	0.0888914	no	lysate
sp|Q7Z3C6|ATG9A_HUMAN	ATG9A	1.06355	0.0888914	no	lysate
sp|O15056|SYNJ2_HUMAN	SYNJ2	1.06355	0.0888914	no	lysate
sp|Q3V6T2|GRDN_HUMAN	CCDC88A	1.06355	0.0888914	no	lysate
sp|Q9H7P9|PKHG2_HUMAN	PLEKHG2	1.06355	0.0888914	no	lysate
sp|Q1ED39|KNOP1_HUMAN	KNOP1	1.06288	0.0879749	no	lysate
sp|P46939|UTRO_HUMAN	UTRN	1.06288	0.0879749	no	lysate
sp|Q9Y5V3-2|MAGD1_HUMAN	MAGED1	1.06288	0.0879749	no	lysate
sp|Q12965|MYO1E_HUMAN	MYO1E	1.06288	0.0879749	no	lysate
sp|O14974|MYPT1_HUMAN	PPP1R12A	1.06288	0.0879749	no	lysate
sp|Q9Y6K0|CEPT1_HUMAN	CEPT1	1.06288	0.0879749	no	lysate
sp|P48553|TPC10_HUMAN	TRAPPC10	1.06288	0.0879749	no	lysate
sp|Q2TAZ0-3|ATG2A_HUMAN	ATG2A	1.06288	0.0879749	no	lysate
sp|Q9NYS0|KBRS1_HUMAN	NKIRAS1	1.06172	0.0863975	no	lysate
sp|Q01844-5|EWS_HUMAN	EWSR1	1.06104	0.0854767	no	lysate
sp|O75477|ERLN1_HUMAN	ERLIN1	1.06104	0.0854767	no	lysate
sp|O60841|IF2P_HUMAN	EIF5B	1.06104	0.0854767	no	lysate
sp|Q5JPE7|NOMO2_HUMAN	NOMO2	1.06104	0.0854767	no	lysate
tr|H3BU53|H3BU53_HUMAN	#N/A	1.06104	0.0854767	no	lysate
sp|Q96EP0|RNF31_HUMAN	RNF31	1.06104	0.0854767	no	lysate
sp|Q92917|GPKOW_HUMAN	GPKOW	1.06104	0.0854767	no	lysate
sp|P26232|CTNA2_HUMAN	CTNNA2	1.06104	0.0854767	no	lysate
sp|Q96S52|PIGS_HUMAN	PIGS	1.06104	0.0854767	no	lysate
sp|P78344|IF4G2_HUMAN	EIF4G2	1.06104	0.0854767	no	lysate
sp|O95140|MFN2_HUMAN	MFN2	1.06104	0.0854767	no	lysate
sp|Q5TAQ9|DCAF8_HUMAN	DCAF8	1.06104	0.0854767	no	lysate
sp|Q6NUQ4|TM214_HUMAN	TMEM214	1.06104	0.0854767	no	lysate
sp|Q9NP81|SYSM_HUMAN	SARS2	1.06104	0.0854767	no	lysate
sp|Q8WU90|ZC3HF_HUMAN	ZC3H15	1.06104	0.0854767	no	lysate
sp|Q6P1N0|C2D1A_HUMAN	CC2D1A	1.06104	0.0854767	no	lysate
sp|Q9UHB6-4|LIMA1_HUMAN	LIMA1	1.06104	0.0854767	no	lysate
sp|Q9NW64|RBM22_HUMAN	RBM22	1.06104	0.0854767	no	lysate
sp|P13674|P4HA1_HUMAN	P4HA1	1.06104	0.0854767	no	lysate
sp|O95391|SLU7_HUMAN	SLU7	1.06104	0.0854767	no	lysate
sp|P08621|RU17_HUMAN	SNRNP70	1.06104	0.0854767	no	lysate
sp|Q8NEN9|PDZD8_HUMAN	PDZD8	1.06104	0.0854767	no	lysate
sp|O94804|STK10_HUMAN	STK10	1.06104	0.0854767	no	lysate
sp|O43865|SAHH2_HUMAN	AHCYL1	1.06104	0.0854767	no	lysate
sp|P46100|ATRX_HUMAN	ATRX	1.06104	0.0854767	no	lysate
sp|Q8TEY7|UBP33_HUMAN	USP33	1.06104	0.0854767	no	lysate
sp|Q96RT1-8|LAP2_HUMAN	ERBIN	1.06104	0.0854767	no	lysate
sp|Q53SF7|COBL1_HUMAN	COBLL1	1.06104	0.0854767	no	lysate
sp|Q9NZM5|GSCR2_HUMAN	GLTSCR2	1.06104	0.0854767	no	lysate
sp|Q12834|CDC20_HUMAN	CDC20	1.12345	0.167936	no	lysate
sp|P20645|MPRD_HUMAN	M6PR	1.06104	0.0854767	no	lysate
sp|Q7L523|RRAGA_HUMAN	RRAGA	1.06104	0.0854767	no	lysate
sp|Q8N9M1|CS047_HUMAN	C19orf47	1.06104	0.0854767	no	lysate
sp|Q5SWX8|ODR4_HUMAN	C1orf27	1.06104	0.0854767	no	lysate
sp|Q676U5|A16L1_HUMAN	ATG16L1	1.06104	0.0854767	no	lysate
sp|Q8IXQ4|GPAM1_HUMAN	GPALPP1	1.06104	0.0854767	no	lysate
sp|Q96SN8|CK5P2_HUMAN	CDK5RAP2	1.06104	0.0854767	no	lysate
sp|P42773|CDN2C_HUMAN	CDKN2C	1.06104	0.0854767	no	lysate
sp|P61916|NPC2_HUMAN	MIR4709	1.06104	0.0854767	no	lysate
sp|Q8N392|RHG18_HUMAN	ARHGAP18	1.06104	0.0854767	no	lysate
sp|O75340|PDCD6_HUMAN	PDCD6	1.06104	0.0854767	no	lysate
sp|Q9NTJ4-4|MA2C1_HUMAN	MAN2C1	1.06104	0.0854767	no	lysate
sp|Q16611|BAK_HUMAN	BAK1	1.06104	0.0854767	no	lysate
sp|A6NHL2|TBAL3_HUMAN	TUBAL3	1.06104	0.0854767	no	lysate
tr|H0YDD8|H0YDD8_HUMAN	#N/A	1.06104	0.0854767	no	lysate
sp|O60427|FADS1_HUMAN	FADS1	1.06104	0.0854767	no	lysate
sp|Q9BRQ0|PYGO2_HUMAN	PYGO2	1.06104	0.0854767	no	lysate
sp|P49116-2|NR2C2_HUMAN	NR2C2	1.06104	0.0854767	no	lysate
sp|Q8TDI0|CHD5_HUMAN	CHD5	1.06036	0.0845521	no	lysate
sp|Q9NXV2|KCTD5_HUMAN	KCTD5	1.06036	0.0845521	no	lysate
sp|Q71RC2-4|LARP4_HUMAN	LARP4	1.05921	0.0829828	no	lysate
sp|Q9P0U3|SENP1_HUMAN	SENP1	1.05921	0.0829828	no	lysate
sp|Q99700|ATX2_HUMAN	ATXN2	1.05921	0.0829828	no	lysate
sp|Q8NCA5|FA98A_HUMAN	FAM98A	1.05921	0.0829828	no	lysate
sp|Q9Y2H2|SAC2_HUMAN	INPP5F	1.04555	0.064268	no	lysate
sp|Q16563|SYPL1_HUMAN	SYPL1	1.05921	0.0829828	no	lysate
sp|Q70E73|RAPH1_HUMAN	RAPH1	1.05921	0.0829828	no	lysate
sp|Q08722|CD47_HUMAN	CD47	1.13003	0.176366	no	lysate
sp|Q7Z417|NUFP2_HUMAN	NUFIP2	1.05921	0.0829828	no	lysate
sp|Q9Y6R0|NUMBL_HUMAN	NUMBL	1.05921	0.0829828	no	lysate
sp|Q6P0N0|M18BP_HUMAN	MIS18BP1	1.05921	0.0829828	no	lysate
sp|Q96FV2|SCRN2_HUMAN	SCRN2	1.05921	0.0829828	no	lysate
sp|P62995|TRA2B_HUMAN	TRA2B	1.05852	0.0820539	no	lysate
sp|Q92614|MY18A_HUMAN	MYO18A	1.05852	0.0820539	no	lysate
sp|P84103|SRSF3_HUMAN	SRSF3	1.05852	0.0820539	no	lysate
sp|Q96LA8|ANM6_HUMAN	PRMT6	1.05852	0.0820539	no	lysate
sp|P51948|MAT1_HUMAN	MNAT1	1.05852	0.0820539	no	lysate
sp|O43426|SYNJ1_HUMAN	SYNJ1	1.05852	0.0820539	no	lysate
sp|Q8IZQ1|WDFY3_HUMAN	WDFY3	1.05852	0.0820539	no	lysate
sp|Q8NFA0|UBP32_HUMAN	USP32	1.05852	0.0820539	no	lysate
sp|O75319|DUS11_HUMAN	DUSP11	1.02671	0.0380333	no	lysate
sp|Q9Y6K9-2|NEMO_HUMAN	IKBKG	1.05852	0.0820539	no	lysate
sp|Q9P0J1-2|PDP1_HUMAN	PDP1	1.05852	0.0820539	no	lysate
sp|Q9NYZ3|GTSE1_HUMAN	GTSE1	1.05852	0.0820539	no	lysate
sp|Q9NXG6-3|P4HTM_HUMAN	P4HTM	1.05852	0.0820539	no	lysate
sp|Q9H0Z9|RBM38_HUMAN	RBM38	1.05852	0.0820539	no	lysate
sp|P06241|FYN_HUMAN	FYN	1.05738	0.0804933	no	lysate
sp|O95405|ZFYV9_HUMAN	ZFYVE9	1.05738	0.0804933	no	lysate
sp|Q96C01|F136A_HUMAN	FAM136A	1.05921	0.0829828	no	lysate
sp|Q8TCD1|CR032_HUMAN	C18orf32	1.70973	0.773768	yes	lysate
sp|Q5T6F2|UBAP2_HUMAN	UBAP2	1.0567	0.0795601	no	lysate
sp|Q8N766|EMC1_HUMAN	EMC1	1.0567	0.0795601	no	lysate
sp|Q9NYU1|UGGG2_HUMAN	UGGT2	1.0567	0.0795601	no	lysate
sp|Q13190|STX5_HUMAN	STX5	1.0567	0.0795601	no	lysate
sp|Q4VCS5|AMOT_HUMAN	AMOT	1.69916	0.764822	yes	lysate
sp|P51809|VAMP7_HUMAN	VAMP7	1.0567	0.0795601	no	lysate
sp|P18887|XRCC1_HUMAN	XRCC1	1.0567	0.0795601	no	lysate
sp|Q9BYJ9|YTHD1_HUMAN	YTHDF1	1.0567	0.0795601	no	lysate
sp|Q9NUQ3|TXLNG_HUMAN	TXLNG	1.0567	0.0795601	no	lysate
sp|Q92843-2|B2CL2_HUMAN	BCL2L2	1.0567	0.0795601	no	lysate
sp|Q8IY37|DHX37_HUMAN	DHX37	1.02249	0.0320845	no	lysate
sp|P37108|SRP14_HUMAN	SRP14	1.0567	0.0795601	no	lysate
sp|Q9UDY8|MALT1_HUMAN	MALT1	1.0567	0.0795601	no	lysate
sp|Q93096|TP4A1_HUMAN	PTP4A1	1.0567	0.0795601	no	lysate
sp|P26599|PTBP1_HUMAN	MIR4745	1.0567	0.0795601	no	lysate
sp|Q9UFC0|LRWD1_HUMAN	LRWD1	1.0567	0.0795601	no	lysate
sp|O75683|SURF6_HUMAN	SURF6	1.0567	0.0795601	no	lysate
sp|O60216|RAD21_HUMAN	MIR3610	1.0567	0.0795601	no	lysate
sp|Q9BUT9|F195A_HUMAN	MCRIP2	1.0567	0.0795601	no	lysate
sp|Q9Y2G3|AT11B_HUMAN	ATP11B	1.0567	0.0795601	no	lysate
sp|P04844|RPN2_HUMAN	RPN2	1.0567	0.0795601	no	lysate
sp|Q32P28|P3H1_HUMAN	P3H1	1.0567	0.0795601	no	lysate
sp|Q9UQ35|SRRM2_HUMAN	SRRM2	1.0567	0.0795601	no	lysate
sp|O95292|VAPB_HUMAN	VAPB	1.0567	0.0795601	no	lysate
sp|Q9UGP8|SEC63_HUMAN	SEC63	1.0567	0.0795601	no	lysate
sp|Q15056|IF4H_HUMAN	EIF4H	1.0567	0.0795601	no	lysate
sp|Q13017|RHG05_HUMAN	ARHGAP5	1.0567	0.0795601	no	lysate
sp|Q6UVY6|MOXD1_HUMAN	MOXD1	1.0567	0.0795601	no	lysate
sp|Q6P6B1|CH047_HUMAN	ERICH5	1.0567	0.0795601	no	lysate
sp|Q96CD2|COAC_HUMAN	PPCDC	1.0567	0.0795601	no	lysate
tr|L0R819|L0R819_HUMAN	#N/A	1.0567	0.0795601	no	lysate
sp|P62318|SMD3_HUMAN	SNRPD3	1.0567	0.0795601	no	lysate
sp|Q13107|UBP4_HUMAN	USP4	1.0567	0.0795601	no	lysate
sp|O94768|ST17B_HUMAN	STK17B	1.0567	0.0795601	no	lysate
sp|Q14527|HLTF_HUMAN	HLTF	1.0567	0.0795601	no	lysate
sp|Q8NB90|SPAT5_HUMAN	SPATA5	1.0567	0.0795601	no	lysate
sp|Q96ND0|F210A_HUMAN	FAM210A	1.0567	0.0795601	no	lysate
sp|Q6ZSZ5|ARHGI_HUMAN	ARHGEF18	1.0567	0.0795601	no	lysate
sp|Q9BRJ7|SDOS_HUMAN	NUDT16L1	1.0567	0.0795601	no	lysate
sp|Q7L804|RFIP2_HUMAN	RAB11FIP2	1.0567	0.0795601	no	lysate
sp|P48059-3|LIMS1_HUMAN	LIMS1	1.0567	0.0795601	no	lysate
sp|Q5JTD0|TJAP1_HUMAN	TJAP1	1.0567	0.0795601	no	lysate
sp|Q8N5I2|ARRD1_HUMAN	ARRDC1	1.0567	0.0795601	no	lysate
sp|Q9Y2X8|UB2D4_HUMAN	UBE2D4	1.0567	0.0795601	no	lysate
sp|Q86X95|CIR1_HUMAN	CIR1	1.0567	0.0795601	no	lysate
sp|A2RUC4|TYW5_HUMAN	TYW5	1.0567	0.0795601	no	lysate
tr|S4R359|S4R359_HUMAN	#N/A	1.0567	0.0795601	no	lysate
sp|O95568|MET18_HUMAN	METTL18	1.0567	0.0795601	no	lysate
sp|P49842|STK19_HUMAN	STK19	1.0567	0.0795601	no	lysate
tr|H0YJX0|H0YJX0_HUMAN	#N/A	1.0567	0.0795601	no	lysate
sp|Q14722|KCAB1_HUMAN	KCNAB1	1.0567	0.0795601	no	lysate
sp|Q9UEY8-2|ADDG_HUMAN	ADD3	1.0567	0.0795601	no	lysate
sp|Q9H425|CA198_HUMAN	C1orf198	1.05601	0.078623	no	lysate
sp|Q15172|2A5A_HUMAN	PPP2R5A	1.05601	0.078623	no	lysate
sp|Q8WXF0|SRS12_HUMAN	SRSF12	1.05601	0.078623	no	lysate
sp|Q99661|KIF2C_HUMAN	KIF2C	1.05487	0.0770705	no	lysate
sp|Q8NBQ5|DHB11_HUMAN	HSD17B11	1.05487	0.0770705	no	lysate
sp|O95208|EPN2_HUMAN	EPN2	1.05487	0.0770705	no	lysate
sp|P18440|ARY1_HUMAN	NAT1	1.05487	0.0770705	no	lysate
sp|Q9Y483|MTF2_HUMAN	MTF2	1.05487	0.0770705	no	lysate
sp|Q5T5C0|STXB5_HUMAN	STXBP5	1.05487	0.0770705	no	lysate
sp|O14641|DVL2_HUMAN	DVL2	1.05487	0.0770705	no	lysate
sp|P46934-4|NEDD4_HUMAN	NEDD4	1.05487	0.0770705	no	lysate
sp|Q9BVW5|TIPIN_HUMAN	TIPIN	1.05487	0.0770705	no	lysate
sp|Q9Y5W9|SNX11_HUMAN	SNX11	1.05487	0.0770705	no	lysate
sp|Q495W5|FUT11_HUMAN	FUT11	1.05487	0.0770705	no	lysate
sp|Q9UJ68|MSRA_HUMAN	MSRA	1.05487	0.0770705	no	lysate
sp|O95081|AGFG2_HUMAN	AGFG2	1.05487	0.0770705	no	lysate
sp|Q9BTD8|RBM42_HUMAN	RBM42	1.05419	0.0761292	no	lysate
sp|O15269|SPTC1_HUMAN	SPTLC1	1.05419	0.0761292	no	lysate
sp|Q9HC52|CBX8_HUMAN	CBX8	1.05419	0.0761292	no	lysate
sp|Q9BQ39|DDX50_HUMAN	DDX50	1.05419	0.0761292	no	lysate
sp|Q7KZI7-14|MARK2_HUMAN	MARK2	1.05419	0.0761292	no	lysate
sp|O60244|MED14_HUMAN	MED14	1.05419	0.0761292	no	lysate
sp|Q99759-2|M3K3_HUMAN	MAP3K3	1.05419	0.0761292	no	lysate
sp|Q9HBM0|VEZA_HUMAN	VEZT	1.05419	0.0761292	no	lysate
sp|Q9HD45|TM9S3_HUMAN	TM9SF3	1.05419	0.0761292	no	lysate
sp|Q96EP5|DAZP1_HUMAN	DAZAP1	1.06104	0.0854767	no	lysate
sp|Q15287|RNPS1_HUMAN	RNPS1	1.05419	0.0761292	no	lysate
sp|Q9NS86|LANC2_HUMAN	LANCL2	1.05419	0.0761292	no	lysate
sp|Q9H204|MED28_HUMAN	MED28	1.05419	0.0761292	no	lysate
sp|Q8IYB5|SMAP1_HUMAN	SMAP1	1.05419	0.0761292	no	lysate
sp|Q16739|CEGT_HUMAN	UGCG	1.05419	0.0761292	no	lysate
sp|Q9NXF8-2|ZDHC7_HUMAN	ZDHHC7	1.0535	0.0751839	no	lysate
sp|Q5QJ74|TBCEL_HUMAN	TBCEL	1.0535	0.0751839	no	lysate
sp|Q99755-3|PI51A_HUMAN	PIP5K1A	1.05237	0.0736396	no	lysate
sp|Q9BTC8|MTA3_HUMAN	MTA3	1.05237	0.0736396	no	lysate
sp|Q8NFW8|NEUA_HUMAN	CMAS	1.05237	0.0736396	no	lysate
sp|Q9Y4E8|UBP15_HUMAN	MIR6125	1.05237	0.0736396	no	lysate
sp|Q9Y487|VPP2_HUMAN	ATP6V0A2	1.05237	0.0736396	no	lysate
sp|Q9NX62|IMPA3_HUMAN	IMPAD1	1.05237	0.0736396	no	lysate
sp|Q96AC1-3|FERM2_HUMAN	FERMT2	1.05237	0.0736396	no	lysate
sp|Q16204|CCDC6_HUMAN	CCDC6	1.05237	0.0736396	no	lysate
sp|Q2M1P5|KIF7_HUMAN	KIF7	1.05237	0.0736396	no	lysate
sp|O00571|DDX3X_HUMAN	DDX3X	1.05237	0.0736396	no	lysate
sp|Q06787|FMR1_HUMAN	FMR1	1.05237	0.0736396	no	lysate
sp|Q9UHX1|PUF60_HUMAN	PUF60	1.05237	0.0736396	no	lysate
sp|Q9NZ08-2|ERAP1_HUMAN	ERAP1	1.05237	0.0736396	no	lysate
sp|P41208|CETN2_HUMAN	CETN2	1.05237	0.0736396	no	lysate
sp|Q14807|KIF22_HUMAN	KIF22	1.05237	0.0736396	no	lysate
sp|O75330-3|HMMR_HUMAN	HMMR	1.05237	0.0736396	no	lysate
sp|P26368|U2AF2_HUMAN	U2AF2	1.05237	0.0736396	no	lysate
sp|Q15058|KIF14_HUMAN	KIF14	1.05237	0.0736396	no	lysate
sp|Q8WVQ1|CANT1_HUMAN	CANT1	1.05237	0.0736396	no	lysate
sp|P09012|SNRPA_HUMAN	SNRPA	1.05237	0.0736396	no	lysate
sp|P18085|ARF4_HUMAN	ARF4	1.05237	0.0736396	no	lysate
sp|P23284|PPIB_HUMAN	PPIB	1.05237	0.0736396	no	lysate
sp|O15504|NUPL2_HUMAN	NUPL2	1.05237	0.0736396	no	lysate
sp|Q15005|SPCS2_HUMAN	SPCS2	1.05237	0.0736396	no	lysate
sp|Q9UJA5|TRM6_HUMAN	TRMT6	1.05237	0.0736396	no	lysate
sp|Q04837|SSBP_HUMAN	SSBP1	1.05237	0.0736396	no	lysate
sp|Q9UNI6|DUS12_HUMAN	DUSP12	1.05237	0.0736396	no	lysate
sp|Q9NRG0|CHRC1_HUMAN	CHRAC1	1.13262	0.179664	no	lysate
sp|Q969E8|TSR2_HUMAN	TSR2	1.05237	0.0736396	no	lysate
sp|Q9UGI8|TES_HUMAN	TES	1.05237	0.0736396	no	lysate
sp|Q6ZN17|LN28B_HUMAN	LIN28B	1.05237	0.0736396	no	lysate
sp|Q9Y484-2|WIPI4_HUMAN	WDR45	1.05237	0.0736396	no	lysate
sp|Q49MG5|MAP9_HUMAN	MAP9	1.05237	0.0736396	no	lysate
sp|Q9BZF9|UACA_HUMAN	UACA	1.05237	0.0736396	no	lysate
sp|O95671|ASML_HUMAN	ASMTL	1.05237	0.0736396	no	lysate
sp|Q13510-2|ASAH1_HUMAN	ASAH1	1.05237	0.0736396	no	lysate
sp|Q9Y4K3|TRAF6_HUMAN	TRAF6	1.05237	0.0736396	no	lysate
sp|O75530-2|EED_HUMAN	EED	1.05237	0.0736396	no	lysate
sp|Q99442|SEC62_HUMAN	SEC62	1.05237	0.0736396	no	lysate
sp|Q13595|TRA2A_HUMAN	TRA2A	1.05237	0.0736396	no	lysate
sp|Q8NG31|CASC5_HUMAN	KNL1	1.05237	0.0736396	no	lysate
sp|O95786|DDX58_HUMAN	DDX58	1.05237	0.0736396	no	lysate
sp|Q5JNZ5|RS26L_HUMAN	RPS26P11	1.05237	0.0736396	no	lysate
sp|P50148|GNAQ_HUMAN	GNAQ	1.05237	0.0736396	no	lysate
sp|O95835|LATS1_HUMAN	LATS1	1.05237	0.0736396	no	lysate
sp|P67812|SC11A_HUMAN	SEC11A	1.05237	0.0736396	no	lysate
sp|P51571|SSRD_HUMAN	SSR4	1.05237	0.0736396	no	lysate
sp|P49418|AMPH_HUMAN	AMPH	1.05237	0.0736396	no	lysate
sp|Q8TDR2|STK35_HUMAN	STK35	1.05237	0.0736396	no	lysate
sp|Q96EY5|MB12A_HUMAN	MVB12A	1.05237	0.0736396	no	lysate
sp|Q12887|COX10_HUMAN	COX10	1.05237	0.0736396	no	lysate
sp|Q96HE9|PRR11_HUMAN	PRR11	1.05237	0.0736396	no	lysate
sp|P35790|CHKA_HUMAN	CHKA	1.05237	0.0736396	no	lysate
sp|Q9Y3B6|EMC9_HUMAN	EMC9	1.05237	0.0736396	no	lysate
sp|Q8WXA3|RUFY2_HUMAN	RUFY2	1.05237	0.0736396	no	lysate
sp|Q8N4S9|MALD2_HUMAN	MARVELD2	1.05237	0.0736396	no	lysate
sp|Q02241|KIF23_HUMAN	KIF23	1.07856	0.109106	no	lysate
sp|Q96Q42|ALS2_HUMAN	ALS2	1.05168	0.0726901	no	lysate
sp|Q53HC9|TSSC1_HUMAN	TSSC1	1.05168	0.0726901	no	lysate
sp|O60245-3|PCDH7_HUMAN	PCDH7	1.05168	0.0726901	no	lysate
sp|O00519|FAAH1_HUMAN	FAAH	1.05168	0.0726901	no	lysate
sp|Q5T0N5-4|FBP1L_HUMAN	FNBP1L	1.05056	0.0711543	no	lysate
sp|O94967|WDR47_HUMAN	WDR47	1.05056	0.0711543	no	lysate
sp|P52298|NCBP2_HUMAN	NCBP2	1.05056	0.0711543	no	lysate
sp|Q6PCB5|RSBNL_HUMAN	RSBN1L	1.05056	0.0711543	no	lysate
sp|O95470|SGPL1_HUMAN	SGPL1	1.05056	0.0711543	no	lysate
sp|Q9Y3B8|ORN_HUMAN	REXO2	1.05056	0.0711543	no	lysate
sp|Q9BVK6|TMED9_HUMAN	TMED9	1.05056	0.0711543	no	lysate
sp|Q8N8R7|AL14E_HUMAN	ARL14EP	1.05056	0.0711543	no	lysate
sp|Q8TBF5-2|PIGX_HUMAN	PIGX	1.05056	0.0711543	no	lysate
sp|Q14728|MFS10_HUMAN	MFSD10	1.05056	0.0711543	no	lysate
sp|Q9NRD5|PICK1_HUMAN	PICK1	1.05056	0.0711543	no	lysate
sp|Q5K651|SAMD9_HUMAN	SAMD9	1.05056	0.0711543	no	lysate
sp|Q9NX63|CHCH3_HUMAN	CHCHD3	1.04986	0.0702005	no	lysate
sp|Q69YN4|VIR_HUMAN	KIAA1429	1.04986	0.0702005	no	lysate
sp|Q8NCN5|PDPR_HUMAN	PDPR	1.04986	0.0702005	no	lysate
sp|Q16560-2|U1SBP_HUMAN	SNRNP35	1.04986	0.0702005	no	lysate
sp|P09382|LEG1_HUMAN	LGALS1	1.04986	0.0702005	no	lysate
sp|Q14161|GIT2_HUMAN	GIT2	1.04986	0.0702005	no	lysate
sp|Q5TCQ9|MAGI3_HUMAN	MAGI3	1.04986	0.0702005	no	lysate
sp|Q5FBB7|SGOL1_HUMAN	SGO1	1.04986	0.0702005	no	lysate
sp|Q9Y6Q9|NCOA3_HUMAN	NCOA3	1.04917	0.0692428	no	lysate
sp|O60447|EVI5_HUMAN	EVI5	1.04917	0.0692428	no	lysate
sp|Q9BV73|CP250_HUMAN	CEP250	1.04875	0.0686734	no	lysate
sp|P51610|HCFC1_HUMAN	HCFC1	1.04875	0.0686734	no	lysate
sp|Q9BSR8|YIPF4_HUMAN	YIPF4	1.04875	0.0686734	no	lysate
sp|Q9NXR8|ING3_HUMAN	ING3	1.04875	0.0686734	no	lysate
sp|Q96EA4|SPDLY_HUMAN	SPDL1	1.04806	0.0677153	no	lysate
sp|P23588|IF4B_HUMAN	EIF4B	1.04806	0.0677153	no	lysate
sp|O94992|HEXI1_HUMAN	HEXIM1	1.04806	0.0677153	no	lysate
sp|Q8NHH9|ATLA2_HUMAN	ATL2	1.04806	0.0677153	no	lysate
sp|Q8IUF8|MINA_HUMAN	MINA	1.04806	0.0677153	no	lysate
sp|O00560|SDCB1_HUMAN	SDCBP	1.04806	0.0677153	no	lysate
sp|Q9Y6A5|TACC3_HUMAN	TACC3	1.04806	0.0677153	no	lysate
sp|Q14677-3|EPN4_HUMAN	CLINT1	1.04806	0.0677153	no	lysate
sp|P27694|RFA1_HUMAN	RPA1	1.04806	0.0677153	no	lysate
sp|O15145|ARPC3_HUMAN	ARPC3	1.04806	0.0677153	no	lysate
sp|Q9H501|ESF1_HUMAN	ESF1	1.04806	0.0677153	no	lysate
sp|Q9HCG8|CWC22_HUMAN	CWC22	1.04806	0.0677153	no	lysate
sp|Q9H3N1|TMX1_HUMAN	TMX1	1.04806	0.0677153	no	lysate
sp|Q9H3F6|BACD3_HUMAN	KCTD10	1.04806	0.0677153	no	lysate
sp|Q96RS6|NUDC1_HUMAN	NUDCD1	1.04806	0.0677153	no	lysate
sp|Q15506|SP17_HUMAN	SPA17	1.04806	0.0677153	no	lysate
sp|Q15007|FL2D_HUMAN	WTAP	1.04806	0.0677153	no	lysate
sp|Q12893|TM115_HUMAN	TMEM115	1.04806	0.0677153	no	lysate
sp|Q9BYG5|PAR6B_HUMAN	PARD6B	1.04806	0.0677153	no	lysate
sp|O75665|OFD1_HUMAN	OFD1	1.04806	0.0677153	no	lysate
sp|P79522|PRR3_HUMAN	PRR3	1.04806	0.0677153	no	lysate
sp|Q6NUK4|REEP3_HUMAN	REEP3	1.04806	0.0677153	no	lysate
sp|Q86YT6|MIB1_HUMAN	MIB1	1.03095	0.0439779	no	lysate
sp|O95619|YETS4_HUMAN	YEATS4	1.04806	0.0677153	no	lysate
sp|Q9NP79|VTA1_HUMAN	VTA1	1.04806	0.0677153	no	lysate
sp|Q9Y2G5|OFUT2_HUMAN	POFUT2	1.04806	0.0677153	no	lysate
sp|Q9UM13|APC10_HUMAN	ANAPC10	1.04806	0.0677153	no	lysate
sp|Q5VVQ6|OTU1_HUMAN	YOD1	1.04806	0.0677153	no	lysate
sp|P20719|HXA5_HUMAN	HOXA5	1.04806	0.0677153	no	lysate
sp|Q9NWR8|MCUB_HUMAN	MCUB	1.04806	0.0677153	no	lysate
sp|Q9NR56|MBNL1_HUMAN	MBNL1	1.04806	0.0677153	no	lysate
sp|Q49A88|CCD14_HUMAN	CCDC14	1.04806	0.0677153	no	lysate
sp|Q86TN4-4|TRPT1_HUMAN	TRPT1	1.04806	0.0677153	no	lysate
sp|Q8N9Z2-2|CC71L_HUMAN	CCDC71L	1.04806	0.0677153	no	lysate
sp|O00560-2|SDCB1_HUMAN	SDCBP	1.04765	0.067155	no	lysate
sp|Q9UPQ3|AGAP1_HUMAN	AGAP1	1.04736	0.0667532	no	lysate
sp|Q969T9|WBP2_HUMAN	WBP2	1.04625	0.0652343	no	lysate
sp|P63272|SPT4H_HUMAN	SUPT4H1	1.04625	0.0652343	no	lysate
sp|P08240|SRPR_HUMAN	SRPRA	1.04625	0.0652343	no	lysate
sp|Q13356|PPIL2_HUMAN	PPIL2	1.04625	0.0652343	no	lysate
sp|P18615|NELFE_HUMAN	MIR1236	1.04625	0.0652343	no	lysate
sp|Q9Y232|CDYL1_HUMAN	CDYL	1.04625	0.0652343	no	lysate
sp|Q16637|SMN_HUMAN	SMN1	1.04625	0.0652343	no	lysate
sp|Q53FT3|HIKES_HUMAN	HIKESHI	1.04625	0.0652343	no	lysate
sp|Q9UN81|LORF1_HUMAN	L1RE1	1.04555	0.064268	no	lysate
sp|Q96NW4|ANR27_HUMAN	ANKRD27	1.04625	0.0652343	no	lysate
sp|Q4LDG9|DNAL1_HUMAN	DNAL1	1.04625	0.0652343	no	lysate
sp|Q9NQC7|CYLD_HUMAN	CYLD	1.04625	0.0652343	no	lysate
sp|Q16342|PDCD2_HUMAN	PDCD2	1.04625	0.0652343	no	lysate
sp|Q96DU7|IP3KC_HUMAN	ITPKC	1.04625	0.0652343	no	lysate
sp|Q06136|KDSR_HUMAN	KDSR	1.1053	0.144444	no	lysate
sp|P52292|IMA1_HUMAN	KPNA2	1.04555	0.064268	no	lysate
sp|Q12802-2|AKP13_HUMAN	AKAP13	1.04555	0.064268	no	lysate
sp|P08648|ITA5_HUMAN	ITGA5	1.04555	0.064268	no	lysate
sp|Q13243|SRSF5_HUMAN	SRSF5	1.04555	0.064268	no	lysate
tr|J3KN66|J3KN66_HUMAN	#N/A	1.04555	0.064268	no	lysate
sp|Q8IWE5|PKHM2_HUMAN	PLEKHM2	1.04555	0.064268	no	lysate
sp|P47224|MSS4_HUMAN	RABIF	1.04555	0.064268	no	lysate
sp|Q96EE3-1|SEH1_HUMAN	SEH1L	1.04555	0.064268	no	lysate
sp|P07947|YES_HUMAN	YES1	1.04555	0.064268	no	lysate
sp|Q71F23|CENPU_HUMAN	CENPU	1.04555	0.064268	no	lysate
sp|O14757|CHK1_HUMAN	CHEK1	1.04625	0.0652343	no	lysate
sp|Q9BWE0|REPI1_HUMAN	REPIN1	1.10336	0.141906	no	lysate
sp|Q7Z5G4|GOGA7_HUMAN	GOLGA7	1.04555	0.064268	no	lysate
sp|Q96S99|PKHF1_HUMAN	PLEKHF1	1.04555	0.064268	no	lysate
sp|Q8WWM7|ATX2L_HUMAN	ATXN2L	1.02496	0.0355734	no	lysate
sp|Q96GC9|VMP1_HUMAN	MIR21	1.04446	0.0627575	no	lysate
sp|Q8WY36|BBX_HUMAN	BBX	1.04446	0.0627575	no	lysate
sp|P16989|YBOX3_HUMAN	YBX3	1.04376	0.061787	no	lysate
sp|P52272|HNRPM_HUMAN	HNRNPM	1.04376	0.061787	no	lysate
sp|Q8IVM0|CCD50_HUMAN	CCDC50	1.04376	0.061787	no	lysate
sp|O75592|MYCB2_HUMAN	MYCBP2	1.04376	0.061787	no	lysate
sp|P52434|RPAB3_HUMAN	POLR2H	1.04376	0.061787	no	lysate
sp|Q13464|ROCK1_HUMAN	ROCK1	1.04376	0.061787	no	lysate
sp|Q14149|MORC3_HUMAN	MORC3	1.04376	0.061787	no	lysate
sp|P12956|XRCC6_HUMAN	XRCC6	1.04376	0.061787	no	lysate
sp|Q13425|SNTB2_HUMAN	SNTB2	1.04376	0.061787	no	lysate
sp|Q15811-8|ITSN1_HUMAN	ITSN1	1.04376	0.061787	no	lysate
sp|Q7Z739|YTHD3_HUMAN	YTHDF3	1.04376	0.061787	no	lysate
sp|Q16537|2A5E_HUMAN	PPP2R5E	1.04376	0.061787	no	lysate
sp|O00629|IMA3_HUMAN	KPNA4	1.04376	0.061787	no	lysate
sp|Q9Y3Y2-3|CHTOP_HUMAN	CHTOP	1.04376	0.061787	no	lysate
sp|O00267|SPT5H_HUMAN	SUPT5H	1.04376	0.061787	no	lysate
sp|P52597|HNRPF_HUMAN	HNRNPF	1.04376	0.061787	no	lysate
sp|Q8WVV9|HNRLL_HUMAN	HNRNPLL	1.04376	0.061787	no	lysate
sp|Q9NQC3|RTN4_HUMAN	RTN4	1.04376	0.061787	no	lysate
sp|Q99613|EIF3C_HUMAN	EIF3C	1.04376	0.061787	no	lysate
sp|P37802|TAGL2_HUMAN	TAGLN2	1.04376	0.061787	no	lysate
sp|Q96JC9|EAF1_HUMAN	EAF1	1.04376	0.061787	no	lysate
sp|Q86YS6|RAB43_HUMAN	RAB43	1.04376	0.061787	no	lysate
sp|Q9Y2X3|NOP58_HUMAN	NOP58	1.04376	0.061787	no	lysate
sp|Q9UHG3|PCYOX_HUMAN	PCYOX1	1.04376	0.061787	no	lysate
sp|O15212|PFD6_HUMAN	MIR6834	1.04376	0.061787	no	lysate
sp|O00165-2|HAX1_HUMAN	HAX1	1.04376	0.061787	no	lysate
sp|Q9H0H5|RGAP1_HUMAN	RACGAP1	1.04376	0.061787	no	lysate
sp|Q8N3R9|MPP5_HUMAN	MPP5	1.2231	0.290545	no	lysate
sp|P54709|AT1B3_HUMAN	ATP1B3	1.04376	0.061787	no	lysate
sp|O96006|ZBED1_HUMAN	ZBED1	1.04376	0.061787	no	lysate
sp|Q5D0E6|DALD3_HUMAN	DALRD3	1.04376	0.061787	no	lysate
sp|Q8NBL1|PGLT1_HUMAN	POGLUT1	1.04376	0.061787	no	lysate
sp|Q9NQL2|RRAGD_HUMAN	RRAGD	1.04376	0.061787	no	lysate
sp|O43795|MYO1B_HUMAN	MYO1B	1.04376	0.061787	no	lysate
sp|Q9NWA0|MED9_HUMAN	MED9	1.04376	0.061787	no	lysate
sp|O43852-4|CALU_HUMAN	CALU	1.04376	0.061787	no	lysate
sp|Q96L73|NSD1_HUMAN	NSD1	1.12028	0.163863	no	lysate
sp|Q8N4V1-2|MMGT1_HUMAN	MMGT1	1.04376	0.061787	no	lysate
sp|O14730|RIOK3_HUMAN	RIOK3	1.04376	0.061787	no	lysate
sp|Q9C0B5|ZDHC5_HUMAN	ZDHHC5	1.04376	0.061787	no	lysate
sp|Q8IUH4|ZDH13_HUMAN	ZDHHC13	1.04376	0.061787	no	lysate
sp|O75554|WBP4_HUMAN	WBP4	1.04376	0.061787	no	lysate
sp|Q96FX7|TRM61_HUMAN	TRMT61A	1.04376	0.061787	no	lysate
sp|Q9Y3B4|PM14_HUMAN	SF3B6	1.04376	0.061787	no	lysate
sp|Q9Y6B7|AP4B1_HUMAN	AP4B1	1.04376	0.061787	no	lysate
sp|Q9NQ11|AT132_HUMAN	ATP13A2	1.04376	0.061787	no	lysate
sp|Q8IZP0-9|ABI1_HUMAN	ABI1	1.04376	0.061787	no	lysate
sp|P61960|UFM1_HUMAN	UFM1	1.04376	0.061787	no	lysate
sp|Q9NUM4|T106B_HUMAN	TMEM106B	1.04376	0.061787	no	lysate
sp|O14893|GEMI2_HUMAN	GEMIN2	1.04376	0.061787	no	lysate
sp|Q9NY97|B3GN2_HUMAN	B3GNT2	1.04376	0.061787	no	lysate
sp|Q9H082|RB33B_HUMAN	RAB33B	1.04376	0.061787	no	lysate
sp|Q9BRR3|TM246_HUMAN	TMEM246	1.04376	0.061787	no	lysate
sp|Q9Y4B4|ARIP4_HUMAN	RAD54L2	1.04305	0.0608124	no	lysate
tr|H7BZJ3|H7BZJ3_HUMAN	#N/A	1.04305	0.0608124	no	lysate
sp|Q96GK7|FAH2A_HUMAN	FAHD2A	1.04305	0.0608124	no	lysate
sp|Q9NPJ8-3|NXT2_HUMAN	NXT2	1.04267	0.0602851	no	lysate
sp|Q9H0R3|TM222_HUMAN	TMEM222	1.04267	0.0602851	no	lysate
sp|Q96GI7|FA89A_HUMAN	FAM89A	1.04197	0.0593102	no	lysate
sp|Q08379|GOGA2_HUMAN	GOLGA2	1.04197	0.0593102	no	lysate
sp|Q99614|TTC1_HUMAN	TTC1	1.04197	0.0593102	no	lysate
sp|Q86W92|LIPB1_HUMAN	PPFIBP1	1.04197	0.0593102	no	lysate
sp|O75396|SC22B_HUMAN	SEC22B	1.04197	0.0593102	no	lysate
sp|O15460|P4HA2_HUMAN	P4HA2	1.04197	0.0593102	no	lysate
sp|Q9UKA9-3|PTBP2_HUMAN	PTBP2	1.04197	0.0593102	no	lysate
sp|Q96FN4|CPNE2_HUMAN	CPNE2	1.04197	0.0593102	no	lysate
sp|Q9NYV6|RRN3_HUMAN	RRN3	1.04197	0.0593102	no	lysate
sp|Q9H2J7|S6A15_HUMAN	SLC6A15	1.04197	0.0593102	no	lysate
sp|Q9P2K8|E2AK4_HUMAN	EIF2AK4	1.04197	0.0593102	no	lysate
sp|Q96B01|R51A1_HUMAN	RAD51AP1	1.04197	0.0593102	no	lysate
sp|Q562R1|ACTBL_HUMAN	ACTBL2	1.04197	0.0593102	no	lysate
sp|Q9H9H4|VP37B_HUMAN	VPS37B	1.04197	0.0593102	no	lysate
sp|Q96BZ9-3|TBC20_HUMAN	TBC1D20	1.04197	0.0593102	no	lysate
sp|Q8WW01|SEN15_HUMAN	TSEN15	1.04197	0.0593102	no	lysate
sp|Q6ZSR9|YJ005_HUMAN	#N/A	1.04197	0.0593102	no	lysate
sp|Q13557-11|KCC2D_HUMAN	CAMK2D	1.04126	0.0583314	no	lysate
sp|Q92900|RENT1_HUMAN	UPF1	1.04126	0.0583314	no	lysate
sp|Q9Y5M8|SRPRB_HUMAN	SRPRB	1.04126	0.0583314	no	lysate
sp|Q9Y6K1|DNM3A_HUMAN	DNMT3A	1.04126	0.0583314	no	lysate
sp|Q7L2Z9|CENPQ_HUMAN	CENPQ	1.04126	0.0583314	no	lysate
sp|P49458|SRP09_HUMAN	SRP9	1.04126	0.0583314	no	lysate
sp|Q96M89|CC138_HUMAN	CCDC138	1.04126	0.0583314	no	lysate
sp|Q99728|BARD1_HUMAN	BARD1	1.04126	0.0583314	no	lysate
sp|Q9H3C7|GGNB2_HUMAN	GGNBP2	1.04126	0.0583314	no	lysate
sp|Q96B45|CJ032_HUMAN	BORCS7	1.04126	0.0583314	no	lysate
sp|Q76L83|ASXL2_HUMAN	ASXL2	1.04126	0.0583314	no	lysate
sp|P52657|T2AG_HUMAN	GTF2A2	1.04126	0.0583314	no	lysate
sp|Q9BTT4|MED10_HUMAN	MED10	1.04126	0.0583314	no	lysate
sp|Q53H80|AKIR2_HUMAN	AKIRIN2	1.04126	0.0583314	no	lysate
sp|Q8IXQ6|PARP9_HUMAN	PARP9	1.04018	0.0568378	no	lysate
sp|Q13439|GOGA4_HUMAN	GOLGA4	1.03947	0.0558547	no	lysate
sp|Q16222|UAP1_HUMAN	UAP1	1.03947	0.0558547	no	lysate
sp|Q9UKY7|CDV3_HUMAN	CDV3	1.03947	0.0558547	no	lysate
sp|Q9NZD2|GLTP_HUMAN	GLTP	1.03947	0.0558547	no	lysate
sp|O15294|OGT1_HUMAN	OGT	1.03947	0.0558547	no	lysate
sp|O60826|CCD22_HUMAN	CCDC22	1.03947	0.0558547	no	lysate
sp|P43034|LIS1_HUMAN	PAFAH1B1	1.03947	0.0558547	no	lysate
sp|P33981|TTK_HUMAN	TTK	1.03947	0.0558547	no	lysate
sp|Q06210|GFPT1_HUMAN	GFPT1	1.03947	0.0558547	no	lysate
sp|P40222|TXLNA_HUMAN	TXLNA	1.03947	0.0558547	no	lysate
sp|Q6IAA8|LTOR1_HUMAN	LAMTOR1	1.03947	0.0558547	no	lysate
sp|O75695|XRP2_HUMAN	RP2	1.03947	0.0558547	no	lysate
sp|P19838-2|NFKB1_HUMAN	NFKB1	1.03947	0.0558547	no	lysate
sp|Q9Y295|DRG1_HUMAN	DRG1	1.03947	0.0558547	no	lysate
sp|O75381|PEX14_HUMAN	PEX14	1.03947	0.0558547	no	lysate
sp|Q04446|GLGB_HUMAN	GBE1	1.03947	0.0558547	no	lysate
sp|Q8NC51|PAIRB_HUMAN	SERBP1	1.03947	0.0558547	no	lysate
sp|P31937|3HIDH_HUMAN	HIBADH	1.03947	0.0558547	no	lysate
sp|O43852-3|CALU_HUMAN	CALU	1.03947	0.0558547	no	lysate
sp|O95232|LC7L3_HUMAN	LUC7L3	1.03947	0.0558547	no	lysate
sp|O95571|ETHE1_HUMAN	ETHE1	1.03947	0.0558547	no	lysate
sp|P62979|RS27A_HUMAN	RPS27A	1.03947	0.0558547	no	lysate
sp|Q6XZF7|DNMBP_HUMAN	DNMBP	1.03947	0.0558547	no	lysate
sp|P29218-3|IMPA1_HUMAN	IMPA1	1.03947	0.0558547	no	lysate
sp|Q8WUD4|CCD12_HUMAN	CCDC12	1.03947	0.0558547	no	lysate
sp|P23470|PTPRG_HUMAN	PTPRG	1.03947	0.0558547	no	lysate
sp|Q9UGN5|PARP2_HUMAN	PARP2	1.03947	0.0558547	no	lysate
sp|Q12955|ANK3_HUMAN	ANK3	1.03947	0.0558547	no	lysate
sp|Q8N488|RYBP_HUMAN	RYBP	1.03947	0.0558547	no	lysate
sp|P35240-2|MERL_HUMAN	NF2	1.03947	0.0558547	no	lysate
sp|P50416|CPT1A_HUMAN	CPT1A	1.03947	0.0558547	no	lysate
sp|Q9UJK0|TSR3_HUMAN	TSR3	1.03947	0.0558547	no	lysate
sp|Q96KA5|CLP1L_HUMAN	CLPTM1L	1.03947	0.0558547	no	lysate
sp|Q969V5|MUL1_HUMAN	MUL1	1.03947	0.0558547	no	lysate
sp|Q9NTM9|CUTC_HUMAN	CUTC	1.03947	0.0558547	no	lysate
sp|Q8IYA6|CKP2L_HUMAN	CKAP2L	1.03947	0.0558547	no	lysate
sp|Q8TE02-4|ELP5_HUMAN	ELP5	1.03947	0.0558547	no	lysate
sp|O43292|GPAA1_HUMAN	GPAA1	1.03947	0.0558547	no	lysate
sp|Q8WUM9|S20A1_HUMAN	SLC20A1	1.03947	0.0558547	no	lysate
sp|P17302|CXA1_HUMAN	GJA1	1.03947	0.0558547	no	lysate
sp|Q12815|TROAP_HUMAN	TROAP	1.03947	0.0558547	no	lysate
sp|P14415|AT1B2_HUMAN	ATP1B2	1.03947	0.0558547	no	lysate
sp|O14657|TOR1B_HUMAN	TOR1B	1.03947	0.0558547	no	lysate
sp|Q96A57-2|TM230_HUMAN	TMEM230	1.03947	0.0558547	no	lysate
sp|Q8TEL6|TP4AP_HUMAN	TRPC4AP	1.03947	0.0558547	no	lysate
sp|Q96IX5|USMG5_HUMAN	MIR1307	1.03947	0.0558547	no	lysate
sp|Q8IWJ2|GCC2_HUMAN	GCC2	1.03095	0.0439779	no	lysate
sp|Q96LL9|DJC30_HUMAN	DNAJC30	1.03947	0.0558547	no	lysate
sp|Q9NXR5|ANR10_HUMAN	ANKRD10	1.03947	0.0558547	no	lysate
sp|Q96NB1|FOPNL_HUMAN	FOPNL	1.03947	0.0558547	no	lysate
sp|O00559|RCAS1_HUMAN	EBAG9	1.03876	0.0548676	no	lysate
sp|Q15051|IQCB1_HUMAN	IQCB1	1.03876	0.0548676	no	lysate
sp|Q5T0D9|TPRGL_HUMAN	TPRG1L	1.03876	0.0548676	no	lysate
sp|Q9NTG7|SIR3_HUMAN	SIRT3	1.03876	0.0548676	no	lysate
sp|Q96I24|FUBP3_HUMAN	FUBP3	1.03769	0.0533822	no	lysate
sp|Q13123|RED_HUMAN	IK	1.03769	0.0533822	no	lysate
sp|Q9NVH1|DJC11_HUMAN	DNAJC11	1.03769	0.0533822	no	lysate
sp|Q9BZJ0|CRNL1_HUMAN	CRNKL1	1.03769	0.0533822	no	lysate
sp|O43741|AAKB2_HUMAN	PRKAB2	1.03769	0.0533822	no	lysate
sp|O75940|SPF30_HUMAN	SMNDC1	1.03769	0.0533822	no	lysate
sp|P57081|WDR4_HUMAN	WDR4	1.03769	0.0533822	no	lysate
sp|Q9Y6M7-7|S4A7_HUMAN	SLC4A7	1.03769	0.0533822	no	lysate
sp|O15118|NPC1_HUMAN	NPC1	1.03769	0.0533822	no	lysate
sp|Q16625|OCLN_HUMAN	OCLN	1.03769	0.0533822	no	lysate
sp|Q9H4L5|OSBL3_HUMAN	OSBPL3	1.03769	0.0533822	no	lysate
sp|P00167|CYB5_HUMAN	CYB5A	1.03769	0.0533822	no	lysate
sp|Q9UK99|FBX3_HUMAN	FBXO3	1.03769	0.0533822	no	lysate
sp|Q9UK53|ING1_HUMAN	ING1	1.03769	0.0533822	no	lysate
sp|Q08050|FOXM1_HUMAN	FOXM1	1.03769	0.0533822	no	lysate
sp|P46734-3|MP2K3_HUMAN	MAP2K3	1.03769	0.0533822	no	lysate
sp|Q03111|ENL_HUMAN	MLLT1	1.03769	0.0533822	no	lysate
sp|Q9UI08-2|EVL_HUMAN	EVL	1.03769	0.0533822	no	lysate
sp|Q2TBE0|C19L2_HUMAN	CWF19L2	1.03698	0.0523908	no	lysate
sp|Q13627-2|DYR1A_HUMAN	DYRK1A	1.03698	0.0523908	no	lysate
sp|Q9UJ41|RABX5_HUMAN	RABGEF1	1.03698	0.0523908	no	lysate
sp|P07196|NFL_HUMAN	NEFL	1.03698	0.0523908	no	lysate
sp|P30462|1B14_HUMAN	HLA-B	1.03698	0.0523908	no	lysate
sp|P61225|RAP2B_HUMAN	RAP2B	1.03698	0.0523908	no	lysate
sp|P31321|KAP1_HUMAN	PRKAR1B	1.03698	0.0523908	no	lysate
sp|O60508|PRP17_HUMAN	CDC40	1.03698	0.0523908	no	lysate
sp|Q5W111|SPRY7_HUMAN	SPRYD7	1.03698	0.0523908	no	lysate
sp|Q99081-3|HTF4_HUMAN	TCF12	1.03698	0.0523908	no	lysate
sp|Q15041|AR6P1_HUMAN	ARL6IP1	1.03698	0.0523908	no	lysate
sp|Q9UBT7|CTNL1_HUMAN	CTNNAL1	1.03698	0.0523908	no	lysate
sp|Q7Z7A4|PXK_HUMAN	PXK	1.03698	0.0523908	no	lysate
sp|Q9NQV6-6|PRD10_HUMAN	PRDM10	1.03698	0.0523908	no	lysate
sp|Q8N302|AGGF1_HUMAN	AGGF1	1.03627	0.0513954	no	lysate
sp|O95789|ZMYM6_HUMAN	ZMYM6	1.03592	0.0509139	no	lysate
sp|O75881|CP7B1_HUMAN	CYP7B1	1.03592	0.0509139	no	lysate
sp|P13196|HEM1_HUMAN	ALAS1	1.03592	0.0509139	no	lysate
sp|Q8N0Z6|TTC5_HUMAN	TTC5	1.03521	0.0499183	no	lysate
sp|O95801|TTC4_HUMAN	TTC4	1.03521	0.0499183	no	lysate
sp|P05023|AT1A1_HUMAN	ATP1A1	1.03521	0.0499183	no	lysate
sp|Q96D46|NMD3_HUMAN	NMD3	1.03521	0.0499183	no	lysate
sp|O15439|MRP4_HUMAN	ABCC4	1.03521	0.0499183	no	lysate
sp|Q86V81|THOC4_HUMAN	ALYREF	1.03521	0.0499183	no	lysate
sp|O60551|NMT2_HUMAN	NMT2	1.03521	0.0499183	no	lysate
sp|Q13310-3|PABP4_HUMAN	PABPC4	1.03521	0.0499183	no	lysate
sp|Q5VT06|CE350_HUMAN	CEP350	1.03521	0.0499183	no	lysate
sp|Q13523|PRP4B_HUMAN	PRPF4B	1.03521	0.0499183	no	lysate
sp|Q13136|LIPA1_HUMAN	PPFIA1	1.03521	0.0499183	no	lysate
sp|Q9NVF7|FBX28_HUMAN	FBXO28	1.04376	0.061787	no	lysate
sp|Q5H9F3-3|BCORL_HUMAN	BCORL1	1.03521	0.0499183	no	lysate
sp|P51116|FXR2_HUMAN	FXR2	1.03521	0.0499183	no	lysate
sp|P13010|XRCC5_HUMAN	XRCC5	1.03521	0.0499183	no	lysate
sp|O95425|SVIL_HUMAN	SVIL	1.03521	0.0499183	no	lysate
sp|Q6P996|PDXD1_HUMAN	PDXDC1	1.03521	0.0499183	no	lysate
sp|Q86XA9|HTR5A_HUMAN	HEATR5A	1.03521	0.0499183	no	lysate
sp|Q9UL63|MKLN1_HUMAN	MKLN1	1.03521	0.0499183	no	lysate
sp|O15013|ARHGA_HUMAN	ARHGEF10	1.03521	0.0499183	no	lysate
sp|P48454-3|PP2BC_HUMAN	PPP3CC	1.03521	0.0499183	no	lysate
sp|Q9NX58|LYAR_HUMAN	LYAR	1.03521	0.0499183	no	lysate
sp|Q8NG08|HELB_HUMAN	HELB	1.03521	0.0499183	no	lysate
sp|Q9HDC9|APMAP_HUMAN	APMAP	1.03521	0.0499183	no	lysate
sp|Q9NS91|RAD18_HUMAN	RAD18	1.03521	0.0499183	no	lysate
sp|P30533|AMRP_HUMAN	LRPAP1	1.03521	0.0499183	no	lysate
sp|P21964|COMT_HUMAN	COMT	1.03521	0.0499183	no	lysate
sp|Q8N6N3|CA052_HUMAN	C1orf52	1.03521	0.0499183	no	lysate
sp|Q9UNL2|SSRG_HUMAN	SSR3	1.03521	0.0499183	no	lysate
sp|P18583-6|SON_HUMAN	MIR6501	1.03521	0.0499183	no	lysate
sp|Q9NUY8|TBC23_HUMAN	TBC1D23	1.0654	0.0913895	no	lysate
sp|Q9UH65|SWP70_HUMAN	SWAP70	1.03521	0.0499183	no	lysate
sp|Q15631|TSN_HUMAN	TSN	1.03521	0.0499183	no	lysate
sp|Q8WUY9|DEP1B_HUMAN	DEPDC1B	1.03521	0.0499183	no	lysate
sp|Q8NAN2|FA73A_HUMAN	MIGA1	1.03521	0.0499183	no	lysate
sp|Q9NU23|LYRM2_HUMAN	LYRM2	1.03521	0.0499183	no	lysate
sp|Q7Z2K6|ERMP1_HUMAN	ERMP1	1.03521	0.0499183	no	lysate
sp|Q9Y5B8|NDK7_HUMAN	NME7	1.03521	0.0499183	no	lysate
sp|O75886|STAM2_HUMAN	STAM2	1.03521	0.0499183	no	lysate
sp|Q9UBK9|UXT_HUMAN	UXT	1.03521	0.0499183	no	lysate
sp|Q9Y5A9|YTHD2_HUMAN	YTHDF2	1.03521	0.0499183	no	lysate
sp|O15287|FANCG_HUMAN	FANCG	1.03521	0.0499183	no	lysate
sp|Q9ULR0-1|ISY1_HUMAN	ISY1	1.03521	0.0499183	no	lysate
sp|Q9C0D5|TANC1_HUMAN	TANC1	1.03521	0.0499183	no	lysate
sp|Q9NUX5|POTE1_HUMAN	POT1	1.03521	0.0499183	no	lysate
sp|Q96EN8|MOCOS_HUMAN	MOCOS	1.03521	0.0499183	no	lysate
sp|O96018|APBA3_HUMAN	APBA3	1.03521	0.0499183	no	lysate
sp|Q16880|CGT_HUMAN	UGT8	1.03521	0.0499183	no	lysate
sp|Q9HCL2|GPAT1_HUMAN	GPAM	1.03521	0.0499183	no	lysate
sp|O96011|PX11B_HUMAN	PEX11B	1.03521	0.0499183	no	lysate
sp|Q9H1A3|METL9_HUMAN	METTL9	1.03521	0.0499183	no	lysate
sp|Q8IWY9|CDAN1_HUMAN	CDAN1	1.03521	0.0499183	no	lysate
sp|Q5BJF6|ODFP2_HUMAN	ODF2	1.03521	0.0499183	no	lysate
sp|Q9HAN9|NMNA1_HUMAN	NMNAT1	1.03521	0.0499183	no	lysate
sp|Q9UBQ6|EXTL2_HUMAN	EXTL2	1.03521	0.0499183	no	lysate
sp|P49761|CLK3_HUMAN	CLK3	1.03521	0.0499183	no	lysate
sp|Q7Z3K6-2|MIER3_HUMAN	MIER3	1.03521	0.0499183	no	lysate
sp|Q86TI0|TBCD1_HUMAN	TBC1D1	1.03449	0.0489186	no	lysate
sp|Q92805|GOGA1_HUMAN	GOLGA1	1.03344	0.0474501	no	lysate
sp|P30154-2|2AAB_HUMAN	PPP2R1B	1.03344	0.0474501	no	lysate
sp|Q5VZK9|LR16A_HUMAN	CARMIL1	1.03344	0.0474501	no	lysate
sp|Q96CP6|GRM1A_HUMAN	GRAMD1A	1.03344	0.0474501	no	lysate
sp|P05026|AT1B1_HUMAN	ATP1B1	1.03344	0.0474501	no	lysate
sp|Q7L1T6|NB5R4_HUMAN	CYB5R4	1.03344	0.0474501	no	lysate
sp|Q96I51|WBS16_HUMAN	RCC1L	1.03344	0.0474501	no	lysate
sp|O95816|BAG2_HUMAN	BAG2	1.03344	0.0474501	no	lysate
sp|O94952|FBX21_HUMAN	FBXO21	1.03344	0.0474501	no	lysate
sp|Q96GN5|CDA7L_HUMAN	CDCA7L	1.03344	0.0474501	no	lysate
sp|Q8IX04|UEVLD_HUMAN	UEVLD	1.03344	0.0474501	no	lysate
sp|Q9NRL3|STRN4_HUMAN	STRN4	1.03344	0.0474501	no	lysate
sp|Q15678|PTN14_HUMAN	PTPN14	1.03344	0.0474501	no	lysate
sp|Q9Y639|NPTN_HUMAN	NPTN	1.03344	0.0474501	no	lysate
sp|Q8TEU7-4|RPGF6_HUMAN	RAPGEF6	1.03344	0.0474501	no	lysate
sp|Q9NXK8|FXL12_HUMAN	FBXL12	1.03344	0.0474501	no	lysate
sp|Q9BQQ3|GORS1_HUMAN	GORASP1	1.03344	0.0474501	no	lysate
sp|Q9ULQ0|STRP2_HUMAN	STRIP2	1.03344	0.0474501	no	lysate
sp|Q9NQP4|PFD4_HUMAN	PFDN4	1.03272	0.0464462	no	lysate
sp|O43303|CP110_HUMAN	CCP110	1.03272	0.0464462	no	lysate
sp|P23634|AT2B4_HUMAN	ATP2B4	1.03272	0.0464462	no	lysate
sp|P22413|ENPP1_HUMAN	ENPP1	1.03272	0.0464462	no	lysate
sp|Q9H8H2|DDX31_HUMAN	DDX31	1.03272	0.0464462	no	lysate
sp|O96008|TOM40_HUMAN	TOMM40	1.03272	0.0464462	no	lysate
sp|Q17RN3|FA98C_HUMAN	FAM98C	1.03272	0.0464462	no	lysate
sp|Q6IQ32|ADNP2_HUMAN	ADNP2	1.03272	0.0464462	no	lysate
sp|Q5UCC4|EMC10_HUMAN	EMC10	1.03272	0.0464462	no	lysate
sp|Q9NRN9|METL5_HUMAN	METTL5	1.03272	0.0464462	no	lysate
sp|Q9H3R5|CENPH_HUMAN	CENPH	1.03272	0.0464462	no	lysate
sp|P63167|DYL1_HUMAN	DYNLL1	1.03272	0.0464462	no	lysate
sp|Q9Y366|IFT52_HUMAN	IFT52	1.03272	0.0464462	no	lysate
sp|Q6PI26|SHQ1_HUMAN	SHQ1	1.03272	0.0464462	no	lysate
sp|Q05932|FOLC_HUMAN	FPGS	1.03272	0.0464462	no	lysate
sp|Q7Z4R8|CF120_HUMAN	C6orf120	1.03272	0.0464462	no	lysate
sp|Q14207|NPAT_HUMAN	NPAT	1.03272	0.0464462	no	lysate
sp|Q9NP80|PLPL8_HUMAN	PNPLA8	1.03272	0.0464462	no	lysate
sp|Q92794|KAT6A_HUMAN	KAT6A	1.032	0.0454381	no	lysate
sp|O75954|TSN9_HUMAN	TSPAN9	1.032	0.0454381	no	lysate
sp|Q96RF0|SNX18_HUMAN	SNX18	1.03167	0.044986	no	lysate
sp|Q8IUR0|TPPC5_HUMAN	TRAPPC5	1.03167	0.044986	no	lysate
sp|Q9NYP9|MS18A_HUMAN	MIS18A	1.03167	0.044986	no	lysate
sp|Q96LT9|RBM40_HUMAN	RNPC3	1.03167	0.044986	no	lysate
sp|Q96C19|EFHD2_HUMAN	EFHD2	1.03095	0.0439779	no	lysate
sp|Q96J42|TXD15_HUMAN	TXNDC15	1.03095	0.0439779	no	lysate
sp|Q12872-2|SFSWA_HUMAN	SFSWAP	1.03095	0.0439779	no	lysate
sp|Q03001|DYST_HUMAN	DST	1.03095	0.0439779	no	lysate
sp|Q7Z3T8|ZFY16_HUMAN	ZFYVE16	1.03095	0.0439779	no	lysate
sp|P11940|PABP1_HUMAN	MIR7705	1.03095	0.0439779	no	lysate
sp|P16615|AT2A2_HUMAN	ATP2A2	1.03095	0.0439779	no	lysate
sp|Q5JSZ5|PRC2B_HUMAN	PRRC2B	1.03095	0.0439779	no	lysate
sp|O60610|DIAP1_HUMAN	DIAPH1	1.03095	0.0439779	no	lysate
sp|Q8NC56|LEMD2_HUMAN	LEMD2	1.03095	0.0439779	no	lysate
sp|P38919|IF4A3_HUMAN	EIF4A3	1.03095	0.0439779	no	lysate
sp|Q6N069|NAA16_HUMAN	NAA16	1.03095	0.0439779	no	lysate
sp|Q15907|RB11B_HUMAN	RAB11B	1.03095	0.0439779	no	lysate
sp|Q03701|CEBPZ_HUMAN	CEBPZ	1.03095	0.0439779	no	lysate
sp|P24666|PPAC_HUMAN	ACP1	1.03095	0.0439779	no	lysate
sp|Q86SF2|GALT7_HUMAN	GALNT7	1.03095	0.0439779	no	lysate
sp|Q5VUJ6|LRCH2_HUMAN	LRCH2	1.03095	0.0439779	no	lysate
sp|Q8IWR0|Z3H7A_HUMAN	ZC3H7A	1.03095	0.0439779	no	lysate
sp|Q86U38|NOP9_HUMAN	NOP9	1.03095	0.0439779	no	lysate
sp|Q9UPY3|DICER_HUMAN	DICER1	1.03095	0.0439779	no	lysate
sp|O95721|SNP29_HUMAN	SNAP29	1.04376	0.061787	no	lysate
sp|Q96HA1|P121A_HUMAN	POM121	1.03095	0.0439779	no	lysate
sp|O95758-4|PTBP3_HUMAN	PTBP3	1.03095	0.0439779	no	lysate
sp|Q14165|MLEC_HUMAN	MLEC	1.03095	0.0439779	no	lysate
sp|Q96K37|S35E1_HUMAN	SLC35E1	1.03095	0.0439779	no	lysate
sp|Q9NVN8|GNL3L_HUMAN	GNL3L	1.03095	0.0439779	no	lysate
sp|P30101|PDIA3_HUMAN	PDIA3	1.03095	0.0439779	no	lysate
sp|Q96A49|SYAP1_HUMAN	SYAP1	1.03095	0.0439779	no	lysate
sp|Q8IYU8|MICU2_HUMAN	MICU2	1.03095	0.0439779	no	lysate
sp|O94925-3|GLSK_HUMAN	GLS	1.03095	0.0439779	no	lysate
sp|P23229|ITA6_HUMAN	ITGA6	1.03095	0.0439779	no	lysate
sp|Q9Y4X5|ARI1_HUMAN	ARIH1	1.03095	0.0439779	no	lysate
sp|Q6P3W7|SCYL2_HUMAN	SCYL2	1.03095	0.0439779	no	lysate
sp|Q9UHR5|S30BP_HUMAN	SAP30BP	1.03095	0.0439779	no	lysate
sp|Q15428|SF3A2_HUMAN	SF3A2	1.03095	0.0439779	no	lysate
sp|O60934|NBN_HUMAN	NBN	1.03095	0.0439779	no	lysate
sp|P51648-2|AL3A2_HUMAN	ALDH3A2	1.03095	0.0439779	no	lysate
sp|Q9UG63|ABCF2_HUMAN	ABCF2	1.03095	0.0439779	no	lysate
sp|A6NKD9|CC85C_HUMAN	CCDC85C	1.03095	0.0439779	no	lysate
sp|Q9BW61|DDA1_HUMAN	DDA1	1.03095	0.0439779	no	lysate
sp|Q9H3H1|MOD5_HUMAN	TRIT1	1.03095	0.0439779	no	lysate
sp|P41214|EIF2D_HUMAN	EIF2D	1.02249	0.0320845	no	lysate
sp|Q9NR48|ASH1L_HUMAN	ASH1L	1.03095	0.0439779	no	lysate
sp|Q8TCA0|LRC20_HUMAN	LRRC20	1.03095	0.0439779	no	lysate
sp|O60333-4|KIF1B_HUMAN	KIF1B	1.03095	0.0439779	no	lysate
sp|P22670|RFX1_HUMAN	RFX1	1.03095	0.0439779	no	lysate
sp|O15111|IKKA_HUMAN	CHUK	1.03095	0.0439779	no	lysate
sp|Q8WWZ3|EDAD_HUMAN	EDARADD	1.03095	0.0439779	no	lysate
sp|Q8TF74|WIPF2_HUMAN	WIPF2	1.03095	0.0439779	no	lysate
sp|O14965|AURKA_HUMAN	AURKA	1.03095	0.0439779	no	lysate
sp|Q8TE04|PANK1_HUMAN	PANK1	1.03095	0.0439779	no	lysate
sp|Q8NBJ4|GOLM1_HUMAN	GOLM1	1.03095	0.0439779	no	lysate
sp|P10644|KAP0_HUMAN	PRKAR1A	1.03095	0.0439779	no	lysate
sp|Q9BW85|CCD94_HUMAN	CCDC94	1.03095	0.0439779	no	lysate
sp|O43318|M3K7_HUMAN	MAP3K7	1.03095	0.0439779	no	lysate
sp|Q9BRX2|PELO_HUMAN	PELO	1.03095	0.0439779	no	lysate
sp|P49585|PCY1A_HUMAN	PCYT1A	1.03095	0.0439779	no	lysate
sp|O96033|MOC2A_HUMAN	MOCS2	1.03095	0.0439779	no	lysate
sp|Q7LBR1|CHM1B_HUMAN	CHMP1B	1.03095	0.0439779	no	lysate
sp|Q13608|PEX6_HUMAN	PEX6	1.03095	0.0439779	no	lysate
sp|Q8NHM5|KDM2B_HUMAN	KDM2B	1.03095	0.0439779	no	lysate
sp|Q330K2|NDUF6_HUMAN	NDUFAF6	1.03095	0.0439779	no	lysate
sp|Q9H2K0|IF3M_HUMAN	MTIF3	1.03095	0.0439779	no	lysate
sp|Q96MH7|CE034_HUMAN	C5orf34	1.03064	0.0435344	no	lysate
sp|Q6UWS5|PT117_HUMAN	PET117	1.02992	0.0425262	no	lysate
sp|Q14008|CKAP5_HUMAN	CKAP5	1.02919	0.0415139	no	lysate
sp|Q96HC4|PDLI5_HUMAN	PDLIM5	1.02919	0.0415139	no	lysate
sp|Q9H5X1|FA96A_HUMAN	FAM96A	1.02919	0.0415139	no	lysate
sp|O75044|SRGP2_HUMAN	SRGAP2	1.02919	0.0415139	no	lysate
sp|Q13951|PEBB_HUMAN	CBFB	1.02919	0.0415139	no	lysate
sp|Q5VWJ9|SNX30_HUMAN	SNX30	1.02919	0.0415139	no	lysate
sp|Q15904|VAS1_HUMAN	ATP6AP1	1.02919	0.0415139	no	lysate
sp|O43169|CYB5B_HUMAN	CYB5B	1.02919	0.0415139	no	lysate
sp|Q15388|TOM20_HUMAN	TOMM20	1.02919	0.0415139	no	lysate
sp|O60476|MA1A2_HUMAN	MAN1A2	1.02919	0.0415139	no	lysate
sp|Q96QR8|PURB_HUMAN	MIR4657	1.02919	0.0415139	no	lysate
sp|O15066|KIF3B_HUMAN	KIF3B	1.02919	0.0415139	no	lysate
sp|P30825|CTR1_HUMAN	SLC7A1	1.02919	0.0415139	no	lysate
sp|P51956|NEK3_HUMAN	NEK3	1.02919	0.0415139	no	lysate
sp|O60885|BRD4_HUMAN	BRD4	1.02847	0.0404973	no	lysate
sp|P48634|PRC2A_HUMAN	PRRC2A	1.02847	0.0404973	no	lysate
sp|Q5VU43-2|MYOME_HUMAN	PDE4DIP	1.02847	0.0404973	no	lysate
sp|P61966|AP1S1_HUMAN	AP1S1	1.02847	0.0404973	no	lysate
sp|O14656|TOR1A_HUMAN	TOR1A	1.02847	0.0404973	no	lysate
sp|Q96NB3|ZN830_HUMAN	ZNF830	1.02847	0.0404973	no	lysate
sp|Q9H9Q2|CSN7B_HUMAN	COPS7B	1.02847	0.0404973	no	lysate
sp|P07099|HYEP_HUMAN	EPHX1	1.02847	0.0404973	no	lysate
sp|Q9UKI8-2|TLK1_HUMAN	TLK1	1.02847	0.0404973	no	lysate
sp|Q13546|RIPK1_HUMAN	RIPK1	1.02847	0.0404973	no	lysate
sp|P98194-7|AT2C1_HUMAN	ATP2C1	1.02847	0.0404973	no	lysate
sp|Q7Z569|BRAP_HUMAN	BRAP	1.02847	0.0404973	no	lysate
sp|Q9NX08|COMD8_HUMAN	COMMD8	1.02847	0.0404973	no	lysate
sp|Q7L590|MCM10_HUMAN	MCM10	1.02847	0.0404973	no	lysate
sp|Q9UKU0-8|ACSL6_HUMAN	ACSL6	1.02847	0.0404973	no	lysate
sp|Q96KF7|SMIM8_HUMAN	SMIM8	1.02847	0.0404973	no	lysate
sp|Q9GZT6|CC90B_HUMAN	CCDC90B	1.02847	0.0404973	no	lysate
sp|Q99470|SDF2_HUMAN	SDF2	1.02847	0.0404973	no	lysate
sp|O60825|F262_HUMAN	PFKFB2	1.02847	0.0404973	no	lysate
sp|O43257|ZNHI1_HUMAN	ZNHIT1	1.02847	0.0404973	no	lysate
sp|Q969P0|IGSF8_HUMAN	IGSF8	1.02774	0.0394766	no	lysate
sp|P11021|GRP78_HUMAN	HSPA5	1.02671	0.0380333	no	lysate
tr|J9JID7|J9JID7_HUMAN	#N/A	1.02671	0.0380333	no	lysate
sp|Q9UNQ2|DIM1_HUMAN	DIMT1	1.02671	0.0380333	no	lysate
sp|Q8N3U4-2|STAG2_HUMAN	STAG2	1.02671	0.0380333	no	lysate
sp|P18583-5|SON_HUMAN	MIR6501	1.02671	0.0380333	no	lysate
sp|P52948|NUP98_HUMAN	NUP98	1.02671	0.0380333	no	lysate
sp|O94832|MYO1D_HUMAN	MYO1D	1.02671	0.0380333	no	lysate
sp|Q13445|TMED1_HUMAN	TMED1	1.02671	0.0380333	no	lysate
sp|P61221|ABCE1_HUMAN	ABCE1	1.02671	0.0380333	no	lysate
sp|Q9P0K7-2|RAI14_HUMAN	RAI14	1.02671	0.0380333	no	lysate
sp|Q14683|SMC1A_HUMAN	SMC1A	1.02671	0.0380333	no	lysate
sp|Q9UN86|G3BP2_HUMAN	G3BP2	1.02671	0.0380333	no	lysate
sp|P84157|MXRA7_HUMAN	MXRA7	1.02671	0.0380333	no	lysate
sp|P51114|FXR1_HUMAN	FXR1	1.02671	0.0380333	no	lysate
sp|Q15643|TRIPB_HUMAN	TRIP11	1.02671	0.0380333	no	lysate
sp|Q15022|SUZ12_HUMAN	SUZ12	1.02671	0.0380333	no	lysate
sp|P49366|DHYS_HUMAN	DHPS	1.02671	0.0380333	no	lysate
sp|Q92734|TFG_HUMAN	TFG	1.02671	0.0380333	no	lysate
sp|Q8WYQ5|DGCR8_HUMAN	DGCR8	1.02671	0.0380333	no	lysate
sp|Q12792|TWF1_HUMAN	TWF1	1.02671	0.0380333	no	lysate
sp|Q9UII4|HERC5_HUMAN	HERC5	1.02671	0.0380333	no	lysate
sp|Q53GQ0|DHB12_HUMAN	HSD17B12	1.02671	0.0380333	no	lysate
sp|O15371|EIF3D_HUMAN	EIF3D	1.02671	0.0380333	no	lysate
sp|Q8TBC3|SHKB1_HUMAN	SHKBP1	1.02671	0.0380333	no	lysate
sp|Q13610|PWP1_HUMAN	PWP1	1.02671	0.0380333	no	lysate
sp|Q5VW38|GP107_HUMAN	GPR107	1.02671	0.0380333	no	lysate
sp|Q9GZZ9|UBA5_HUMAN	UBA5	1.02671	0.0380333	no	lysate
sp|O60292|SI1L3_HUMAN	SIPA1L3	1.02671	0.0380333	no	lysate
sp|O00311|CDC7_HUMAN	CDC7	1.02671	0.0380333	no	lysate
sp|Q8WXD5|GEMI6_HUMAN	GEMIN6	1.02671	0.0380333	no	lysate
sp|Q7KYR7-1|BT2A1_HUMAN	BTN2A1	1.02671	0.0380333	no	lysate
sp|P61019|RAB2A_HUMAN	RAB2A	1.02671	0.0380333	no	lysate
sp|Q9H0J9|PAR12_HUMAN	PARP12	1.02671	0.0380333	no	lysate
sp|P17482|HXB9_HUMAN	HOXB9	1.02671	0.0380333	no	lysate
sp|O43760|SNG2_HUMAN	SYNGR2	1.02671	0.0380333	no	lysate
sp|Q9NSY1|BMP2K_HUMAN	BMP2K	1.02671	0.0380333	no	lysate
sp|P55145|MANF_HUMAN	MANF	1.02671	0.0380333	no	lysate
sp|Q53EZ4|CEP55_HUMAN	CEP55	1.02671	0.0380333	no	lysate
sp|Q9Y4K4|M4K5_HUMAN	MAP4K5	1.04625	0.0652343	no	lysate
sp|O15440|MRP5_HUMAN	ABCC5	1.02671	0.0380333	no	lysate
sp|Q9HB09|B2L12_HUMAN	BCL2L12	1.02671	0.0380333	no	lysate
sp|Q9H875|PKRI1_HUMAN	PRKRIP1	1.02671	0.0380333	no	lysate
sp|Q86V87|F16B2_HUMAN	FAM160B2	1.02671	0.0380333	no	lysate
sp|Q8WUW1-2|BRK1_HUMAN	BRK1	1.02671	0.0380333	no	lysate
sp|A6NHX0|GATL2_HUMAN	GATSL2	1.02671	0.0380333	no	lysate
sp|O75503|CLN5_HUMAN	CLN5	1.02671	0.0380333	no	lysate
sp|Q8IVH8|M4K3_HUMAN	MAP4K3	1.02671	0.0380333	no	lysate
sp|Q8TCZ2-5|C99L2_HUMAN	CD99L2	1.02671	0.0380333	no	lysate
sp|Q9UBI4|STML1_HUMAN	STOML1	1.02671	0.0380333	no	lysate
sp|O94986|CE152_HUMAN	CEP152	1.02671	0.0380333	no	lysate
sp|Q7Z6J8|UBE3D_HUMAN	UBE3D	1.02598	0.0370083	no	lysate
sp|Q9H2K8|TAOK3_HUMAN	TAOK3	1.02598	0.0370083	no	lysate
sp|Q8TAA9|VANG1_HUMAN	VANGL1	1.02569	0.0365984	no	lysate
sp|Q9UBU8-2|MO4L1_HUMAN	MORF4L1	1.02496	0.0355734	no	lysate
sp|P35268|RL22_HUMAN	RPL22	1.02496	0.0355734	no	lysate
sp|Q8N9E0|F133A_HUMAN	FAM133A	1.02496	0.0355734	no	lysate
sp|Q86Y34|GPR97_HUMAN	ADGRG3	1.04555	0.064268	no	lysate
sp|Q8N1F8|S11IP_HUMAN	STK11IP	1.02496	0.0355734	no	lysate
sp|P54646|AAPK2_HUMAN	PRKAA2	1.02496	0.0355734	no	lysate
sp|Q02809|PLOD1_HUMAN	PLOD1	1.02249	0.0320845	no	lysate
sp|Q10469|MGAT2_HUMAN	MGAT2	1.02496	0.0355734	no	lysate
sp|P49247|RPIA_HUMAN	RPIA	1.02496	0.0355734	no	lysate
sp|Q9NWS8|RMND1_HUMAN	RMND1	1.02496	0.0355734	no	lysate
sp|Q96RQ1|ERGI2_HUMAN	ERGIC2	1.02496	0.0355734	no	lysate
sp|Q9BYT3|STK33_HUMAN	STK33	1.02496	0.0355734	no	lysate
sp|Q9H299|SH3L3_HUMAN	SH3BGRL3	1.02496	0.0355734	no	lysate
sp|Q9BUB5|MKNK1_HUMAN	MKNK1	1.02496	0.0355734	no	lysate
sp|Q8TC12|RDH11_HUMAN	RDH11	1.02496	0.0355734	no	lysate
sp|Q9NQX4|MYO5C_HUMAN	MYO5C	1.02496	0.0355734	no	lysate
sp|Q6PJG2|EMSA1_HUMAN	ELMSAN1	1.02496	0.0355734	no	lysate
sp|Q9HD67|MYO10_HUMAN	MYO10	1.02496	0.0355734	no	lysate
sp|Q96AA3|RFT1_HUMAN	RFT1	1.02496	0.0355734	no	lysate
sp|P61077-3|UB2D3_HUMAN	UBE2D3	1.02496	0.0355734	no	lysate
sp|O95409|ZIC2_HUMAN	ZIC2	1.02496	0.0355734	no	lysate
sp|Q9BRP8|WIBG_HUMAN	PYM1	1.02423	0.0345443	no	lysate
sp|Q99615|DNJC7_HUMAN	DNAJC7	1.02423	0.0345443	no	lysate
sp|Q15836|VAMP3_HUMAN	VAMP3	1.02423	0.0345443	no	lysate
sp|Q9NUQ8|ABCF3_HUMAN	ABCF3	1.02423	0.0345443	no	lysate
[truncated: 9,901 more rows]

## Sheet: timeseries vs protein
	RNAseq time series		Protein
genes	0 hr	24 hr	5SA+ vs 5SA-	compartment	>2sd
ANKRD1	0	3.07172	#N/A	#N/A	#N/A
YAP1	0	2.92652	2.64827	lysate	yes
CTGF	0	2.88379	2.60528	exosome	yes
CYR61	0	2.02841	1.61399	exosome	yes
JUB	0	1.79904	#N/A	#N/A	#N/A
HIST2H2AB	0	0	1.69572	lysate	yes
AMOTL2	0	1.79629	2.17081	lysate	yes
CSNK2A1P	0	1.54026	#N/A	#N/A	#N/A
MIR3916	0	1.12516	#N/A	#N/A	#N/A
ANXA1	0	1.10002	0.683693	lysate	yes
ERC1	0	1.0408	0.028587	lysate	no
RPPH1	0	1.03973	#N/A	#N/A	#N/A
UGT2A1	0	0.989131	#N/A	#N/A	#N/A
GRAPL	0	0.967395	#N/A	#N/A	#N/A
LOC645781	0	0.790655	#N/A	#N/A	#N/A
UNC45B	0	0.768948	#N/A	#N/A	#N/A
DPY19L2	0	0.74554	#N/A	#N/A	#N/A
SCARNA17	0	0.738965	#N/A	#N/A	#N/A
ITGB8	0	0.737781	#N/A	#N/A	#N/A
HFM1	0	0.684343	#N/A	#N/A	#N/A
SYDE2	0	0.682465	#N/A	#N/A	#N/A
SLFN12	0	0.664131	#N/A	#N/A	#N/A
PTPN21	0	0.634819	#N/A	#N/A	#N/A
HMGA1	0	0	1.17621	lysate	yes
ETS1	0	0.623121	#N/A	#N/A	#N/A
DDX12	0	0.617638	#N/A	#N/A	#N/A
RND3	0	0.617181	0.400698	lysate	yes
LOC440117	0	0.606341	#N/A	#N/A	#N/A
ZNF487P	0	0.585969	#N/A	#N/A	#N/A
LRR1	0	0.582816	#N/A	#N/A	#N/A
LGALS3	0	0.562036	-0.0432528	lysate	no
PREB	0	0.548727	-0.0156646	lysate	no
KLRG1	0	0.536998	#N/A	#N/A	#N/A
FAM200A	0	0.525606	#N/A	#N/A	#N/A
SAMD13	0	0.520802	#N/A	#N/A	#N/A
LTK	0	0.500322	#N/A	#N/A	#N/A
SERTM1	0	0.494067	#N/A	#N/A	#N/A
HAUS1	0	0.479286	0.0142121	lysate	no
ABHD3	0	0.476474	#N/A	#N/A	#N/A
UQCRB	0	0.468987	-0.118172	lysate	no
C6orf162	0	0.464849	#N/A	#N/A	#N/A
C22orf32	0	0.462409	#N/A	#N/A	#N/A
RPS29	0	0.452605	#N/A	#N/A	#N/A
ZNFX1-AS1	0	0.448035	#N/A	#N/A	#N/A
OCIAD2	0	0.442964	-0.0540716	lysate	no
GDPD1	0	0.442157	-0.127983	lysate	no
KRT10	0	0.440031	#N/A	#N/A	#N/A
CMC1	0	0.43998	#N/A	#N/A	#N/A
PTGES3	0	0.434522	-0.148623	lysate	no
EID2B	0	0.423153	#N/A	#N/A	#N/A
DHX40	0	0.392671	-0.081819	lysate	no
CASC3	0	0.391518	0.12679	lysate	no
C5orf53	0	0.381764	#N/A	#N/A	#N/A
TMEM104	0	0.380477	#N/A	#N/A	#N/A
DPH5	0	0.379151	-0.0757793	lysate	no
ATP5G3	0	0.375968	#N/A	#N/A	#N/A
CAP2	0	0.372214	0.156196	lysate	no
SNRPD2	0	0.370511	-0.00968002	lysate	no
LYPLA1	0	0.363628	-0.0600864	lysate	no
MAD2L1	0	0.361885	-0.0312322	lysate	no
MCOLN3	0	0.360079	#N/A	#N/A	#N/A
SNUPN	0	0.349574	-0.0999704	lysate	no
MB21D2	0	0.347493	0.243966	lysate	no
NDUFB5	0	0.34047	-0.0540716	lysate	no
SNAR-E	0	0	#N/A	#N/A	#N/A
ANXA2	0	0	1.07633	lysate	yes
RELA	0	0	0.0082459	lysate	no
C6orf124	0	0	#N/A	#N/A	#N/A
ACR	0	0	#N/A	#N/A	#N/A
C1orf85	0	0	#N/A	#N/A	#N/A
PSCA	0	0	#N/A	#N/A	#N/A
TSPAN19	0	0	#N/A	#N/A	#N/A
SCO2,TYMP	0	0	#N/A	#N/A	#N/A
KLRAP1	0	0	#N/A	#N/A	#N/A
BCDIN3D,LOC100286844	0	0	#N/A	#N/A	#N/A
RMRP	0	0	#N/A	#N/A	#N/A
RAB17	0	0	#N/A	#N/A	#N/A
ACYP2	0	0	0.208933	lysate	no
SNHG10	0	0	#N/A	#N/A	#N/A
RPS21	0	0	-0.0276479	lysate	no
GPATCH4	0	0	0.255624	lysate	no
RHBDL1	0	0	#N/A	#N/A	#N/A
GADD45G	0	0	#N/A	#N/A	#N/A
ENTPD3-AS1	0	0	#N/A	#N/A	#N/A
LOC100132247	0	0	#N/A	#N/A	#N/A
ARL6IP6	0	0	#N/A	#N/A	#N/A
LOC100506714	0	0	#N/A	#N/A	#N/A
EXOSC1	0	0	-0.0540716	lysate	no
ABHD16B	0	0	#N/A	#N/A	#N/A
TCEAL1	0	0	-0.148623	lysate	no
APOO	0	0	-0.0697449	lysate	no
FAM3C	0	0	0.199817	lysate	no
PPIL3	0	0	0.0142121	lysate	no
ARL4A	0	0	#N/A	#N/A	#N/A
DDIT4L	0	0	#N/A	#N/A	#N/A
SNRPE	0	0	-0.130335	lysate	no
C7orf36	0	0	#N/A	#N/A	#N/A
C11orf10	0	0	#N/A	#N/A	#N/A
ANAPC4	0	0	-0.0757793	lysate	no
NPM3	0	0	-0.0121068	lysate	no
ZNF567	0	0	0.296358	lysate	no
C5orf55	0	0	#N/A	#N/A	#N/A
NME3	0	0	-0.0710022	lysate	no
NPDC1	0	0	#N/A	#N/A	#N/A
RRP36	0	0	0.0320845	lysate	no
PPA2	0	0	-0.112099	lysate	no
FOXRED1	0	0	-0.00968002	lysate	no
TMEM70	0	0	-0.0192312	lysate	no
NAT8L	0	0	-0.265785	lysate	no
BLOC1S3	0	0	-0.290269	lysate	no
C1orf31	0	0	#N/A	#N/A	#N/A
ADPRHL2	0	0	-0.000159769	lysate	no
CYP4V2	0	0	#N/A	#N/A	#N/A
SNRNP25	0	0	#N/A	#N/A	#N/A
FAM54A	0	0	#N/A	#N/A	#N/A
FAM96A	0	0	0.0415139	lysate	no
SYBU	0	0	#N/A	#N/A	#N/A
NGFRAP1	0	0	#N/A	#N/A	#N/A
NUP37	0	0	0.0142121	lysate	no
PDHX	0	0	-0.00370013	lysate	no
PPA1	0	0	-0.0902388	lysate	no
COX7B	0	0	#N/A	#N/A	#N/A
CDK20	0	0	#N/A	#N/A	#N/A
ALG2	0	0	0.120899	lysate	no
MAP2K2	0	0	-0.106032	lysate	no
SMOX	0	0	#N/A	#N/A	#N/A
C19orf24	0	0	#N/A	#N/A	#N/A
C6orf115	0	0	#N/A	#N/A	#N/A
CHCHD10	0	0	#N/A	#N/A	#N/A
ZNF358	0	0	#N/A	#N/A	#N/A
PCMT1	0	0	-0.154731	lysate	no
TMEM147	0	0	#N/A	#N/A	#N/A
RFK	0	0	0.135211	lysate	no
CAPZA2	0	0	-0.0336468	lysate	no
RPL41	0	0	#N/A	#N/A	#N/A
DBI	0	0	-0.087864	lysate	no
ZFAND2B	0	0	#N/A	#N/A	#N/A
PSMB4	0	0	-0.0697449	lysate	no
SCAMP3	0	0	0.182954	lysate	no
ATP5A1	0	0	-0.0999704	lysate	no
PPIL1	0	0	-0.0999704	lysate	no
MRPL13	0	0	-0.130335	lysate	no
RPLP2	0	0	-0.0721315	lysate	no
BRMS1L	0	0	-0.0192312	lysate	no
MYL12A	0	0	#N/A	#N/A	#N/A
RPS8	0	1.92018	-0.087864	lysate	no
UHMK1	0	0.384563	#N/A	#N/A	#N/A
MDM4	0	0.326344	#N/A	#N/A	#N/A
ARHGAP29	0	0.411771	0.237526	lysate	no
CSRP1	0	0.557004	0.281563	lysate	no
ANGEL2	0	0.401595	-0.00724919	lysate	no
PHYHIPL	0	1.12735	#N/A	#N/A	#N/A
TRUB1	0	0.328218	-0.120527	lysate	no
EXPH5	0	0.404454	#N/A	#N/A	#N/A
ZBTB44	0	0.45464	#N/A	#N/A	#N/A
RAD51AP1	0	0.368146	0.0593102	lysate	no
AKAP3	0	0.563054	#N/A	#N/A	#N/A
SLC38A1	0	0.374089	0.123423	lysate	no
PTPN11,RPH3A	0	1.12213	#N/A	#N/A	#N/A
RFC3	0	0.323548	-0.0576919	lysate	no
BMP4	0	0.476901	#N/A	#N/A	#N/A
THBS1	0	0.98939	0.138605	exosome	no
ATP10A	0	0.687317	#N/A	#N/A	#N/A
MRM1	0	0.399197	0.205672	lysate	no
C17orf102	0	0.735585	#N/A	#N/A	#N/A
NAPG	0	0.48047	0.00471421	lysate	no
TTC30B	0	0.418081	#N/A	#N/A	#N/A
PARD6B	0	0.399015	0.0677153	lysate	no
IQCJ,IQCJ-SCHIP1,SCHIP1	0	0.400163	#N/A	#N/A	#N/A
UBA3	0	0.336756	-0.0841977	lysate	no
VGLL3	0	0.438456	#N/A	#N/A	#N/A
CD47	0	0.441845	0.176366	lysate	no
TBL1XR1	0	0.328503	-0.087864	lysate	no
LIPH	0	0.485848	#N/A	#N/A	#N/A
C4orf52	0	0.376695	#N/A	#N/A	#N/A
GPX8	0	0.416396	0.269913	lysate	no
GTF2H2B	0	0.401967	#N/A	#N/A	#N/A
UBE2D2	0	0.503524	#N/A	#N/A	#N/A
CRSP8P	0	0.688344	#N/A	#N/A	#N/A
SLC25A46	0	0.577832	0.0972986	lysate	no
ANXA3	0	0.887296	0.893085	exosome	yes
LOC221710	0	0.357933	#N/A	#N/A	#N/A
HSF2	0	0.336121	#N/A	#N/A	#N/A
UBE2CBP	0	0.415333	#N/A	#N/A	#N/A
VSNL1	0	0.901404	0.852145	lysate	yes
C7orf64	0	0.43244	#N/A	#N/A	#N/A
TPI1P2	0	0.757113	#N/A	#N/A	#N/A
SGK196	0	0.446384	#N/A	#N/A	#N/A
ZNF572	0	0.517923	#N/A	#N/A	#N/A
SNTB1	0	0.360899	0.226461	lysate	no
LOC100288181	0	0.523363	#N/A	#N/A	#N/A
NR4A3	0	0.437461	#N/A	#N/A	#N/A
OR5C1	0	2.51907	#N/A	#N/A	#N/A
C9orf72	0	0.395729	#N/A	#N/A	#N/A
ZFX	0	0.543184	#N/A	#N/A	#N/A
FAM199X	0	0.32773	#N/A	#N/A	#N/A
CDR1	0	0.866553	#N/A	#N/A	#N/A
GLTPD1	0	0	#N/A	#N/A	#N/A
DFFB	0	0	-0.176904	lysate	no
VAMP3	0	0	0.0345443	lysate	no
PARK7	0	0	-0.148623	lysate	no
SLC25A33	0	0	#N/A	#N/A	#N/A
VPS13D	0	0	-0.185364	lysate	no
DDI2,RSC1A1	0	0	#N/A	#N/A	#N/A
MIR3675	0	0	#N/A	#N/A	#N/A
NBPF3	0	0	#N/A	#N/A	#N/A
CLIC4	0	0	-0.0939145	lysate	no
NUDC	0	0	-0.0516731	lysate	no
BAI2,PTP4A2	0	0	#N/A	#N/A	#N/A
RBBP4	0	0	-0.0516731	lysate	no
C1orf122	0	0	0.311111	lysate	no
PPIE	0	0	0.0201739	lysate	no
ZMPSTE24	0	0	0.0082459	lysate	no
YBX1	0	0	0.226461	lysate	no
IPO13	0	0	-0.163174	lysate	no
DPH2	0	0	-0.0576919	lysate	no
ZYG11B	0	0	-0.0216539	lysate	no
H2AFV	0	0	0.846308	lysate	yes
LEPR,LEPROT	0	0	#N/A	#N/A	#N/A
FPGT,FPGT-TNNI3K,TNNI3K	0	0	#N/A	#N/A	#N/A
RABGGTB	0	0	-0.103665	lysate	no
CTBS	0	0	0.185523	lysate	no
SH3GLB1	0	0	0.0226254	lysate	no
EPHX4	0	0	#N/A	#N/A	#N/A
STXBP3	0	0	-0.0697449	lysate	no
CAPZA1	0	0	-0.0456593	lysate	no
NOTCH2	0	0	0.197234	lysate	no
LIX1L	0	0	#N/A	#N/A	#N/A
RBM8A	0	0	0.00227516	lysate	no
FLAD1	0	0	-0.136425	lysate	no
NDUFS2	0	0	-0.19151	lysate	no
UCK2	0	0	0.330371	exosome	no
MPZL1	0	0	-0.0348255	lysate	no
TIPRL	0	0	-0.103665	lysate	no
SFT2D2	0	0	-0.377235	exosome	no
RASAL2	0	0	0.0947961	lysate	no
TOR3A	0	0	-0.0757793	lysate	no
SOAT1	0	0	-0.0576919	lysate	no
TIMM17A	0	0	-0.00370013	lysate	no
RNPEP	0	0	-0.112099	lysate	no
CNTN2	0	0	#N/A	#N/A	#N/A
DYRK3	0	0	#N/A	#N/A	#N/A
RPS6KC1	0	0	#N/A	#N/A	#N/A
MOSC1	0	0	#N/A	#N/A	#N/A
SRP9	0	0	0.0583314	lysate	no
ZNF678	0	0	#N/A	#N/A	#N/A
URB2	0	0	-0.0697449	lysate	no
HES4	0	0	#N/A	#N/A	#N/A
DVL1	0	0	0.113352	lysate	no
LOC643988	0	0	#N/A	#N/A	#N/A
TMEM52	0	0	#N/A	#N/A	#N/A
CEP104	0	0	-0.0396506	lysate	no
C1orf174	0	0	0.111621	lysate	no
RPA2	0	0	0.0142121	lysate	no
EYA3	0	0	-0.000159769	lysate	no
SDC3	0	0	#N/A	#N/A	#N/A
SNRNP40	0	0	-0.0252293	lysate	no
AK2	0	0	-0.0156646	lysate	no
SFPQ	0	0	-0.0252293	lysate	no
SNIP1	0	0	-0.0902388	lysate	no
GJA9,MYCBP	0	0	#N/A	#N/A	#N/A
TRIT1	0	0	0.0439779	lysate	no
COL9A2	0	0	#N/A	#N/A	#N/A
SLC6A9	0	0	-0.193038	lysate	no
ERI3	0	0	-0.106032	lysate	no
ZSWIM5	0	0	#N/A	#N/A	#N/A
ATPAF1	0	0	-0.0456593	lysate	no
TMEM48	0	0	#N/A	#N/A	#N/A
HSPB11	0	0	-0.179225	lysate	no
USP24	0	0	-0.087864	lysate	no
TM2D1	0	0	#N/A	#N/A	#N/A
GNG12	0	0	0.360179	lysate	no
DEPDC1	0	0	#N/A	#N/A	#N/A
SSX2IP	0	0	0.0913895	lysate	no
ZNHIT6	0	0	-0.00370013	lysate	no
GTF2B	0	0	0.0142121	lysate	no
CCBL2,RBMXL1	0	0	#N/A	#N/A	#N/A
EVI5	0	0	0.0692428	lysate	no
TMED5	0	0	-0.0552934	lysate	no
KCNA2	0	0	#N/A	#N/A	#N/A
KCNA3	0	0	#N/A	#N/A	#N/A
LRIF1	0	0	0.118379	lysate	no
DENND2C	0	0	#N/A	#N/A	#N/A
SIKE1	0	0	-0.173092	lysate	no
LOC728989	0	0	#N/A	#N/A	#N/A
PRKAB2	0	0	0.0533822	lysate	no
HIST2H2AA3,HIST2H3C,HIST2H4A	0	0	#N/A	#N/A	#N/A
TEAD1	0	0.544482	0.82881	lysate	yes
MCL1	0	0	0.150321	lysate	no
RFX5	0	0	-0.0697449	lysate	no
PMVK	0	0	-0.154731	lysate	no
RIT1	0	0	#N/A	#N/A	#N/A
RC3H1	0	0	-0.206124	lysate	no
RFWD2	0	0	#N/A	#N/A	#N/A
GLRX2	0	0	0.129319	lysate	no
YOD1	0	0	0.0677153	lysate	no
LPGAT1	0	0	-0.0180872	lysate	no
SMYD2	0	0	0.0972986	lysate	no
ENAH	0	0	0.00580685	lysate	no
EGLN1	0	0	-0.0516731	lysate	no
B3GALNT2	0	0	#N/A	#N/A	#N/A
HEATR1	0	0	0.197234	lysate	no
CHML,OPN3	0	0	#N/A	#N/A	#N/A
SUV39H2	0	0	#N/A	#N/A	#N/A
LOC399744	0	0	#N/A	#N/A	#N/A
CSGALNACT2	0	0	#N/A	#N/A	#N/A
UBE2D1	0	0	#N/A	#N/A	#N/A
CDK1	0	0	-0.106032	lysate	no
SGPL1	0	0	0.0711543	lysate	no
MCU	0	0	0.00227516	lysate	no
PPIF	0	0	-0.0975995	lysate	no
BMPR1A	0	0	#N/A	#N/A	#N/A
IFIT5	0	0	-0.0396506	lysate	no
PCGF5	0	0	#N/A	#N/A	#N/A
TBC1D12	0	0	0.120899	lysate	no
HOGA1	0	0	#N/A	#N/A	#N/A
PI4K2A	0	0	-0.0372401	lysate	no
C10orf28	0	0	#N/A	#N/A	#N/A
NFKB2	0	0	-0.00724919	lysate	no
TRIM8	0	0	#N/A	#N/A	#N/A
FAM160B1	0	0	0.0320845	lysate	no
CASC2	0	0	#N/A	#N/A	#N/A
ATE1	0	0	-0.0156646	lysate	no
PSTK	0	0	#N/A	#N/A	#N/A
GLRX3	0	0	-0.0552934	lysate	no
PWWP2B	0	0	#N/A	#N/A	#N/A
PAOX	0	0	#N/A	#N/A	#N/A
IDI1	0	0	-0.265785	lysate	no
PFKFB3	0	0	-0.0576919	lysate	no
CPA4	0	1.95287	0.780219	exosome	yes
FAM107B	0	0	0.136029	lysate	no
PTPLA	0	0	#N/A	#N/A	#N/A
ARHGAP21	0	0	-0.0216539	lysate	no
SYT15	0	0	#N/A	#N/A	#N/A
PARG	0	0	-0.0396506	lysate	no
IPMK	0	0	#N/A	#N/A	#N/A
SLC25A16	0	0	#N/A	#N/A	#N/A
TYSND1	0	0	-0.0192312	lysate	no
SAR1A	0	0	-0.0697449	lysate	no
PSAP	0	0	0.144444	lysate	no
SFTPA2	0	0	#N/A	#N/A	#N/A
ATAD1	0	0	-0.00968002	lysate	no
TCTN3	0	0	-0.115813	lysate	no
FRAT2	0	0	#N/A	#N/A	#N/A
CHUK	0	0	0.0439779	lysate	no
SFXN4	0	0	0.0142121	lysate	no
PRDX3	0	0	-0.0456593	lysate	no
IFITM1,IFITM2	0	0	#N/A	#N/A	#N/A
B4GALNT4	0	0	#N/A	#N/A	#N/A
TUB	0	0	-0.0999704	lysate	no
AKIP1	0	0	#N/A	#N/A	#N/A
WEE1	0	0	-0.174579	lysate	no
LOC729013	0	0	#N/A	#N/A	#N/A
METTL15	0	0	-0.112099	lysate	no
PRRG4	0	0	#N/A	#N/A	#N/A
QSER1	0	0	-0.0939145	lysate	no
DTX4	0	0	#N/A	#N/A	#N/A
COX8A	0	0	#N/A	#N/A	#N/A
POLA2	0	0	-0.112099	lysate	no
MALAT1	0	0	#N/A	#N/A	#N/A
EHBP1L1	0	0	#N/A	#N/A	#N/A
PCNXL3	0	0	#N/A	#N/A	#N/A
KLC2	0	0	0.0177266	lysate	no
CTTN	0	0	-0.0456593	lysate	no
TMEM135	0	0	#N/A	#N/A	#N/A
ARHGAP42,TMEM133	0	0	#N/A	#N/A	#N/A
DYNC2H1	0	0	-0.148623	lysate	no
CUL5	0	0	-0.12425	lysate	no
ZC3H12C	0	0	#N/A	#N/A	#N/A
FDX1	0	0	-0.0420571	lysate	no
UBE4A	0	0	-0.136425	lysate	no
RNF26	0	0	#N/A	#N/A	#N/A
SC5DL	0	0	#N/A	#N/A	#N/A
SPA17	0	0	0.0677153	lysate	no
NAP1L4	0	0	-0.106032	lysate	no
MRPL17	0	0	-0.209987	lysate	no
TMEM41B	0	0	#N/A	#N/A	#N/A
EIF4G2	0	0	0.0854767	lysate	no
COPB1,PSMA1	0	0	#N/A	#N/A	#N/A
SVIP	0	0	0.0261314	lysate	no
LIN7C	0	0	-0.00968002	lysate	no
KIF18A	0	0	-0.127983	lysate	no
SLC1A2	0	0	#N/A	#N/A	#N/A
MTCH2	0	0	-0.0456593	lysate	no
NUP160	0	0	-0.0456593	lysate	no
TIMM10	0	0	-0.00370013	lysate	no
AHNAK,EEF1G,TUT1	0	0	#N/A	#N/A	#N/A
BRMS1	0	0	#N/A	#N/A	#N/A
UNC93B1	0	0	#N/A	#N/A	#N/A
MRE11A	0	0	0.0345443	lysate	no
TMEM123	0	0	0.138562	lysate	no
DCUN1D5	0	0	-0.0312322	lysate	no
KIAA1826	0	0	#N/A	#N/A	#N/A
ALKBH8	0	0	#N/A	#N/A	#N/A
NPAT	0	0	0.0464462	lysate	no
KDELC2	0	0	-0.0540716	lysate	no
RDX	0	0	0.0082459	lysate	no
SRPR	0	0	-0.271484	exosome	no
SNX19	0	0	0.123423	lysate	no
NCAPD3	0	0	-0.0396506	lysate	no
KCNA6,NDUFA9	0	0	#N/A	#N/A	#N/A
USP5	0	0	-0.112099	lysate	no
PEX5	0	0	0.0142121	lysate	no
CDKN1B	0	0	-0.444507	exosome	no
DDX47	0	0	0.203084	lysate	no
STK38L	0	0	-0.00370013	lysate	no
CNTN1	0	0	0.409984	exosome	no
TMEM117	0	0	#N/A	#N/A	#N/A
ANO6	0	0	0.129319	lysate	no
ARID2	0	0	-0.0252293	lysate	no
TUBA1C	0	0	0.164623	lysate	no
LARP4	0	0	0.0829828	lysate	no
DIP2B	0	0	0.0142121	lysate	no
DAZAP2	0	0	#N/A	#N/A	#N/A
C12orf10	0	0	-0.0733927	lysate	no
PDE1B	0	0	#N/A	#N/A	#N/A
NAB2	0	0	#N/A	#N/A	#N/A
CAND1	0	0	-0.0637158	lysate	no
CPSF6	0	0	-0.0492706	lysate	no
FRS2	0	0	#N/A	#N/A	#N/A
CCT2	0	0	-0.0576919	lysate	no
TMEM19	0	0	#N/A	#N/A	#N/A
TMTC3	0	0	0.0320845	lysate	no
TMPO	0	0	-0.00968002	lysate	no
ACTR6	0	0	-0.0841977	lysate	no
TCP11L2	0	0	#N/A	#N/A	#N/A
IFT81	0	0	-0.154731	lysate	no
TAOK3	0	0	0.0370083	lysate	no
LOC100506649	0	0	#N/A	#N/A	#N/A
MLEC	0	0	0.0439779	lysate	no
SNRNP35	0	0	0.0702005	lysate	no
FAM101A,ZNF664,ZNF664-FAM101A	0	0	#N/A	#N/A	#N/A
AACS	0	0	0.103204	lysate	no
ZNF140	0	0	#N/A	#N/A	#N/A
C12orf4	0	0	#N/A	#N/A	#N/A
C12orf53	0	0	#N/A	#N/A	#N/A
MANSC1	0	0	#N/A	#N/A	#N/A
PDE3A	0	0	#N/A	#N/A	#N/A
KRAS	0	0	-0.0661064	lysate	no
C12orf11	0	0	#N/A	#N/A	#N/A
TMTC1	0	0	#N/A	#N/A	#N/A
IPO8	0	0	-0.0216539	lysate	no
DENND5B	0	0	0.109106	lysate	no
RPAP3	0	0	0.103204	lysate	no
ARF3	0	0	-0.0115416	exosome	no
TUBA1B	0	0	0.208108	exosome	no
TUBA1A	0	0	-0.130335	lysate	no
ANKRD52	0	0	-0.0156646	lysate	no
CDK4	0	0	-0.118172	lysate	no
C12orf66	0	0	#N/A	#N/A	#N/A
GNS	0	0	-0.0121068	lysate	no
NAP1L1	0	0	-0.0396506	lysate	no
BBS10	0	0	#N/A	#N/A	#N/A
OSBPL8	0	0	-0.0360573	lysate	no
KITLG	0	0	#N/A	#N/A	#N/A
UBE2N	0	0	-0.106032	lysate	no
CRY1	0	0	0.00227516	lysate	no
CORO1C,TMEM119	0	0	#N/A	#N/A	#N/A
KCTD10	0	0	0.0677153	lysate	no
ZCCHC8	0	0	0.0201739	lysate	no
RASL11A	0	0	#N/A	#N/A	#N/A
POLR1D	0	0	-0.0396506	lysate	no
B3GALTL	0	0	-0.266209	exosome	no
RFXAP	0	0	-0.0336468	lysate	no
UFM1	0	0	0.061787	lysate	no
C13orf15	0	0	#N/A	#N/A	#N/A
AKAP11	0	0	0.12679	lysate	no
KIAA1704	0	0	#N/A	#N/A	#N/A
COG3	0	0	-0.0156646	lysate	no
RB1	0	0	-0.150959	lysate	no
CDADC1	0	0	#N/A	#N/A	#N/A
RNASEH2B	0	0	-0.0757793	lysate	no
ALG11,UTP14C	0	0	#N/A	#N/A	#N/A
SLAIN1	0	0	0.159517	lysate	no
ABHD13	0	0	#N/A	#N/A	#N/A
LAMP1	0	0	-0.0252293	lysate	no
UPF3A	0	0	-0.115813	lysate	no
GJB2	0	0	#N/A	#N/A	#N/A
XPO4	0	0	-0.0276479	lysate	no
ZDHHC20	0	0	-0.168438	lysate	no
EFHA1	0	0	#N/A	#N/A	#N/A
MIPEP	0	0	-0.0540716	lysate	no
MTMR6	0	0	-0.0432528	lysate	no
RNF6	0	0	#N/A	#N/A	#N/A
MTIF3	0	0	0.0439779	lysate	no
HMGB1	0	0	-0.0396506	lysate	no
HSPH1	0	0	0.0913895	lysate	no
N4BP2L1	0	0	#N/A	#N/A	#N/A
RCBTB1	0	0	#N/A	#N/A	#N/A
TGDS	0	0	#N/A	#N/A	#N/A
DOCK9	0	0	-0.0336468	lysate	no
ANKRD10	0	0	0.0558547	lysate	no
PCID2	0	0	-0.144861	lysate	no
SNX6	0	0	-0.0661064	lysate	no
CDKN3	0	0	#N/A	#N/A	#N/A
TUFT1	0	0.574445	0.701054	lysate	yes
C14orf135	0	0	#N/A	#N/A	#N/A
ARG2	0	0	-0.12425	lysate	no
SLC39A9	0	0	#N/A	#N/A	#N/A
DNAL1	0	0	0.0652343	lysate	no
ZNF410	0	0	#N/A	#N/A	#N/A
KIAA0317	0	0	#N/A	#N/A	#N/A
EIF2B2	0	0	0.028587	lysate	no
TDP1	0	0	0.305308	lysate	no
CPSF2	0	0	-0.0637158	lysate	no
UBR7	0	0	-0.0902388	lysate	no
DICER1	0	0	0.0439779	lysate	no
PAPOLA	0	0	-0.00968002	lysate	no
INF2	0	0	-0.0540716	lysate	no
SIVA1	0	0	-0.203821	lysate	no
KIAA0284	0	0	#N/A	#N/A	#N/A
CCNB1IP1	0	0	#N/A	#N/A	#N/A
SCOC	0	0.330764	-0.108395	lysate	no
SLC7A7	0	0	#N/A	#N/A	#N/A
PRMT5	0	0	-0.081819	lysate	no
HAUS4	0	0	-0.0336468	lysate	no
HOMEZ	0	0	0.12679	lysate	no
PPP1R3E	0	0	-0.109698	exosome	no
RABGGTA	0	0	-0.0336468	lysate	no
EGLN3	0	0	#N/A	#N/A	#N/A
SPTSSA	0	0	#N/A	#N/A	#N/A
EAPP	0	0	-0.0915397	lysate	no
RALGAPA1	0	0	-0.0975995	lysate	no
DNAAF2	0	0	-0.078162	lysate	no
TXNDC16	0	0	-0.152395	lysate	no
GMFB	0	0	-0.0336468	lysate	no
GCH1	0	0	#N/A	#N/A	#N/A
EXOC5	0	0	-0.0576919	lysate	no
MAX	0	0	0.249797	lysate	no
ALDH6A1	0	0	-0.136425	lysate	no
TMED10	0	0	0.00227516	lysate	no
GALC	0	0	#N/A	#N/A	#N/A
CKB	0	0	-0.136425	lysate	no
WHAMMP2	0	0	#N/A	#N/A	#N/A
RPUSD2	0	0	-0.0673544	lysate	no
CASC5	0	0	#N/A	#N/A	#N/A
CHP	0	0	#N/A	#N/A	#N/A
LOC729082	0	0	#N/A	#N/A	#N/A
SNAP23	0	0	0.0913895	lysate	no
CASC4	0	0	-0.0540716	lysate	no
EIF3J	0	0	0.0142121	lysate	no
SPATA5L1	0	0	0.177099	lysate	no
PLDN	0	0	#N/A	#N/A	#N/A
AP4E1	0	0	0.124266	lysate	no
RNF111	0	0	#N/A	#N/A	#N/A
FOXB1	0	0	#N/A	#N/A	#N/A
LACTB	0	0	-0.0757793	lysate	no
RAB11A	0	0	0.0947961	lysate	no
C15orf39	0	0	-0.147711	lysate	no
RCN2	0	0	-0.0576919	lysate	no
MORF4L1	0	0	0.0355734	lysate	no
SCARNA15	0	0	#N/A	#N/A	#N/A
ARRDC4	0	0	#N/A	#N/A	#N/A
RHOV	0	0	#N/A	#N/A	#N/A
NDUFAF1	0	0	-0.112099	lysate	no
CDAN1	0	0	0.0499183	lysate	no
LCMT2	0	0	-0.0697449	lysate	no
SHC4	0	0	#N/A	#N/A	#N/A
TRPM7	0	0	#N/A	#N/A	#N/A
SPPL2A	0	0	#N/A	#N/A	#N/A
LYSMD2	0	0	0.0201739	lysate	no
ARPP19	0	0	-0.0336468	lysate	no
ARHGAP18	0	0.458647	0.657475	exosome	yes
RPS27L	0	0	-0.0721315	lysate	no
APH1B	0	0	#N/A	#N/A	#N/A
OAZ2	0	0	#N/A	#N/A	#N/A
DPP8	0	0	-0.010807	lysate	no
SEMA7A,UBL7	0	0	#N/A	#N/A	#N/A
COX5A	0	0	-0.0576919	lysate	no
PTPN9	0	0	-0.0012652	lysate	no
SOLH	0	0	#N/A	#N/A	#N/A
STUB1	0	0	-0.0637158	lysate	no
LMF1	0	0	#N/A	#N/A	#N/A
RNPS1	0	0	0.0761292	lysate	no
THOC6,TNFRSF12A	0	0	#N/A	#N/A	#N/A
GLIS2	0	0	#N/A	#N/A	#N/A
C16orf72	0	0	#N/A	#N/A	#N/A
METTL9	0	0	0.0499183	lysate	no
NFATC2IP,SPNS1	0	0	#N/A	#N/A	#N/A
ZNF48	0	0	0.147779	lysate	no
SEPHS2	0	0	-0.0733927	lysate	no
KAT8	0	0	-0.0697449	lysate	no
NCRNA00273	0	0	#N/A	#N/A	#N/A
PHKB	0	0	-0.0600864	lysate	no
TMEM188	0	0	#N/A	#N/A	#N/A
CYLD	0	0	0.0652343	lysate	no
CHD9	0	0	0.0981947	lysate	no
LPCAT2	0	0	0.00580685	lysate	no
RSPRY1	0	0	0.0142121	lysate	no
ARL2BP	0	0	-0.144861	lysate	no
CBFB	0	0	0.0415139	lysate	no
E2F4,ELMO3	0	0	#N/A	#N/A	#N/A
GABARAPL2	0	0	-0.0576919	lysate	no
ZNF469	0	0	#N/A	#N/A	#N/A
SPG7	0	0	-0.0915397	lysate	no
DEF8	0	0	#N/A	#N/A	#N/A
USP7	0	0	-0.0697449	lysate	no
ZC3H7A	0	0	0.0439779	lysate	no
RRN3	0	0	0.0593102	lysate	no
ZNF768	0	0	-0.0216539	lysate	no
STX1B	0	0	#N/A	#N/A	#N/A
C16orf87	0	0	0.105715	lysate	no
ITFG1	0	0	-0.106032	lysate	no
NUDT21	0	0	-0.130335	lysate	no
ZDHHC1	0	0	#N/A	#N/A	#N/A
NQO1	0	0	#N/A	#N/A	#N/A
ZDHHC7	0	0	0.0751839	lysate	no
CHMP1A	0	0	-0.0456593	lysate	no
WDR81	0	0	-0.179225	lysate	no
TMEM93	0	0	#N/A	#N/A	#N/A
SLC16A13	0	0	#N/A	#N/A	#N/A
SLC2A4	0	0	#N/A	#N/A	#N/A
PRPSAP2	0	0	-0.12425	lysate	no
NEK8,RPL23A	0	0	#N/A	#N/A	#N/A
TAOK1	0	0	-0.193417	exosome	no
CPD	0	0	0.0177266	lysate	no
PSMD3	0	0	-0.0456593	lysate	no
COASY	0	0	-0.169291	lysate	no
AOC2,AOC3,PSME3	0	0	#N/A	#N/A	#N/A
C17orf104	0	0	#N/A	#N/A	#N/A
NPEPPS	0	0	-0.0697449	lysate	no
CLTC	0	0	-0.0456593	lysate	no
NOL11	0	0	0.200501	lysate	no
KPNA2	0	0	0.064268	lysate	no
SEC14L1	0	0	#N/A	#N/A	#N/A
CRK	0	0	-0.0336468	lysate	no
KIAA0664	0	0	#N/A	#N/A	#N/A
C1GALT1C1	0	0	0.597019	lysate	yes
UBE2G1	0	0	-0.087864	lysate	no
PELP1	0	0	-0.0276479	lysate	no
AURKB	0	0	0.00227516	lysate	no
PLD6	0	0	#N/A	#N/A	#N/A
C17orf103	0	0	#N/A	#N/A	#N/A
ALDOC	0	0	-0.0492706	lysate	no
RDM1	0	0	#N/A	#N/A	#N/A
ACACA	0	0	-0.0576919	lysate	no
KRT19	0	0	#N/A	#N/A	#N/A
KLHL11	0	0	-0.0252293	lysate	no
KCNH4	0	0	#N/A	#N/A	#N/A
BECN1	0	0	-0.0180872	lysate	no
TTK	0	0	0.590976	exosome	yes
EFTUD2	0	0	-0.0216539	lysate	no
IFT52	0	0	0.537028	exosome	yes
CDC27	0	0	0.0177266	lysate	no
FAM117A	0	0	#N/A	#N/A	#N/A
ANKRD40	0	0	#N/A	#N/A	#N/A
SRSF1	0	0	0.0972986	lysate	no
SKA2	0	0	-0.0276479	lysate	no
RNFT1	0	0	#N/A	#N/A	#N/A
APPBP2	0	0	-0.00968002	lysate	no
INTS2	0	0	-0.00370013	lysate	no
HELZ	0	0	0.0106891	lysate	no
GALK1	0	0	-0.181543	lysate	no
UNC13D	0	0	#N/A	#N/A	#N/A
SRSF2	0	0	-0.092364	exosome	no
FASN	0	0	-0.166966	lysate	no
CSNK1D	0	0	0.196542	lysate	no
USP14	0	0	-0.0757793	lysate	no
TYMS	0	0	-0.109736	lysate	no
LOC645355	0	0	#N/A	#N/A	#N/A
RAB12	0	0	0.0142121	lysate	no
APCDD1	0	0	#N/A	#N/A	#N/A
SEH1L	0	0	0.064268	lysate	no
CEP192	0	0	0.0913895	lysate	no
CNN2	0	0	0.510448	lysate	yes
RIOK3	0	0	0.061787	lysate	no
RNF138	0	0	#N/A	#N/A	#N/A
ELP2	0	0	-0.0999704	lysate	no
SMAD4	0	0	-0.0516731	lysate	no
PMAIP1	0	0	#N/A	#N/A	#N/A
KIAA1468	0	0	-0.12425	lysate	no
RSL24D1	0	0	0.481588	lysate	yes
SALL3	0	0	#N/A	#N/A	#N/A
RBFA	0	0	-0.026487	lysate	no
LOC645158	0	0	#N/A	#N/A	#N/A
ROCK1	0	0	0.061787	lysate	no
LMAN1	0	0	-0.0132378	lysate	no
RNF152	0	0	#N/A	#N/A	#N/A
RPS15	0	0	-0.0312322	lysate	no
THOP1	0	0	-0.109736	lysate	no
HDGFRP2	0	0	-0.00370013	lysate	no
QTRT1	0	0	-0.087864	lysate	no
ZNF440	0	0	#N/A	#N/A	#N/A
PRKACA	0	0	-0.087864	lysate	no
TECR	0	0	-0.403274	exosome	no
POP4	0	0	-0.0841977	lysate	no
C19orf2	0	0	#N/A	#N/A	#N/A
DPY19L3	0	0	-0.0432528	lysate	no
NUDT19,RGS9BP	0	0	#N/A	#N/A	#N/A
ZNF181,ZNF302	0	0	#N/A	#N/A	#N/A
LSR	0	0	0.00471421	lysate	no
SDHAF1	0	0	#N/A	#N/A	#N/A
CNN3	0	0.414574	0.464266	lysate	yes
PVRL2	0	0	#N/A	#N/A	#N/A
GLTSCR1	0	0	-0.126602	lysate	no
RPL13A	0	0	-0.0999704	lysate	no
TBC1D17	0	0	#N/A	#N/A	#N/A
POLD1	0	0	-0.222338	lysate	no
PPP2R1A	0	0	0.00471421	lysate	no
ZNF460	0	0	#N/A	#N/A	#N/A
ZIK1	0	0	#N/A	#N/A	#N/A
POLRMT	0	0	-0.160845	lysate	no
LPPR3	0	0	#N/A	#N/A	#N/A
C19orf70	0	0	-0.0156646	lysate	no
DUS3L	0	0	-0.00370013	lysate	no
KEAP1	0	0	-0.332563	lysate	no
ZNF443,ZNF709,ZNF799	0	0	#N/A	#N/A	#N/A
C19orf56	0	0	#N/A	#N/A	#N/A
FARSA	0	0	-0.0156646	lysate	no
SAMD1	0	0	-0.175414	lysate	no
ZNF529	0	0	#N/A	#N/A	#N/A
ZFP30	0	0	#N/A	#N/A	#N/A
MAPK1IP1L	0	0	0.435384	lysate	yes
PAFAH1B3	0	0	-0.185364	lysate	no
ZNF180	0	0	#N/A	#N/A	#N/A
KPTN	0	0	0.137749	lysate	no
FAM71E1	0	0	#N/A	#N/A	#N/A
CTU1	0	0	-0.00968002	lysate	no
MBOAT7,TMC4	0	0	#N/A	#N/A	#N/A
PPP6R1,TMEM86B	0	0	#N/A	#N/A	#N/A
ZNF471	0	0	#N/A	#N/A	#N/A
ID2	0	0	#N/A	#N/A	#N/A
CPSF3	0	0	-0.0276479	lysate	no
HPCAL1	0	0	-0.0757793	lysate	no
DDX1	0	0	-0.0216539	lysate	no
MYCN	0	0	#N/A	#N/A	#N/A
KCNS3	0	0	#N/A	#N/A	#N/A
EFR3B	0	0	-0.0915397	lysate	no
EPT1	0	0	-0.081819	lysate	no
C2orf18	0	0	#N/A	#N/A	#N/A
GPN1	0	0	-0.00968002	lysate	no
PPP1CB	0	0	0.0201739	lysate	no
SPAST	0	0	-0.0156646	lysate	no
TTC27	0	0	-0.0396506	lysate	no
FAM82A1	0	0	#N/A	#N/A	#N/A
PPM1B	0	0	0.0082459	lysate	no
PRKCE	0	0	#N/A	#N/A	#N/A
EPCAM	0	0	-0.0999704	lysate	no
ERLEC1	0	0	0.0142121	lysate	no
MTHFD2	0	0	-0.0336468	lysate	no
PTCD3	0	0	-0.081819	lysate	no
C2orf29	0	0	#N/A	#N/A	#N/A
LIMS1	0	0	0.0795601	lysate	no
TMEM87B	0	0	#N/A	#N/A	#N/A
POLR1B	0	0	-0.0156646	lysate	no
ANKRD30BL	0	0	#N/A	#N/A	#N/A
UBXN4	0	0	-0.0216539	lysate	no
UBR3	0	0	-0.230812	lysate	no
HAT1	0	0	-0.142521	lysate	no
ITGA6	0	0	0.0439779	lysate	no
AGPS	0	0	0.0201739	lysate	no
UBE2E3	0	0	-0.0396506	lysate	no
ITGAV	0	0	0.249797	lysate	no
ANKAR,ASNSD1	0	0	#N/A	#N/A	#N/A
NAB1	0	0	#N/A	#N/A	#N/A
SLC39A10	0	0	-0.278264	lysate	no
PLCL1	0	0	-0.136425	lysate	no
C2orf47	0	0	0.0142121	lysate	no
BZW1	0	0	-0.0216539	lysate	no
NBEAL1	0	0	0.167936	lysate	no
PIKFYVE	0	0	-0.0312322	lysate	no
CAB39	0	0	-0.0156646	lysate	no
ODC1	0	0	#N/A	#N/A	#N/A
E2F6	0	0	0.168686	lysate	no
WDR35	0	0	0.0972986	lysate	no
PUM2	0	0	-0.118172	lysate	no
PTRHD1	0	0	0.120899	lysate	no
FNDC4	0	0	#N/A	#N/A	#N/A
MEMO1	0	0	-0.0939145	lysate	no
STRN	0	0	-0.0576919	lysate	no
PRKD3	0	0	-0.232428	lysate	no
SOS1	0	0	-0.0396506	lysate	no
MAP4K3	0	0	0.0380333	lysate	no
COX7A2L	0	0	-0.0576919	lysate	no
KCNG3	0	0	#N/A	#N/A	#N/A
LRPPRC	0	0	-0.106032	lysate	no
SIX2	0	0	#N/A	#N/A	#N/A
ACTN4	0	0	0.435384	lysate	yes
PSME4	0	0	-0.0276479	lysate	no
RTN4	0	0	0.061787	lysate	no
LOC339803	0	0	#N/A	#N/A	#N/A
USP34	0	0	-0.130335	lysate	no
CCT4	0	0	-0.0456593	lysate	no
C1D	0	0	-0.081819	lysate	no
FOXI3	0	0	#N/A	#N/A	#N/A
STARD7	0	0	-0.118172	lysate	no
TMEM131	0	0	-0.220042	lysate	no
BUB1	0	0	0.182233	lysate	no
SLC35F5	0	0	#N/A	#N/A	#N/A
EPB41L5	0	0	-0.0012652	lysate	no
TMEM185B	0	0	#N/A	#N/A	#N/A
MAP3K2	0	0	-0.0396506	lysate	no
POLR2D	0	0	0.0972986	lysate	no
ORC4	0	0	-0.0576919	lysate	no
STK17A	0	0	0.406482	lysate	yes
RPRM	0	0	#N/A	#N/A	#N/A
STK39	0	0	-0.228523	lysate	no
SPC25	0	0	-0.197662	lysate	no
SLC25A12	0	0	-0.0156646	lysate	no
KIAA1715	0	0	#N/A	#N/A	#N/A
NCKAP1	0	0	-0.0252293	lysate	no
SF3B1	0	0	-0.00370013	lysate	no
ALS2	0	0	0.0726901	lysate	no
SUMO1	0	0	-0.0336468	lysate	no
NDUFS1	0	0	-0.222338	lysate	no
LANCL1	0	0	-0.154731	lysate	no
MREG,PECR	0	0	#N/A	#N/A	#N/A
SLC16A14	0	0	#N/A	#N/A	#N/A
LOC348761	0	0	#N/A	#N/A	#N/A
PSMD1	0	0	-0.0757793	lysate	no
COPS8	0	0	-0.0276479	lysate	no
MTERFD2	0	0	#N/A	#N/A	#N/A
DTYMK	0	0	0.0082459	lysate	no
TRIB3	0	0	#N/A	#N/A	#N/A
PLCB1	0	0	-0.199969	lysate	no
CSRP2BP,PET117	0	0	#N/A	#N/A	#N/A
POLR3F	0	0	-0.00724919	lysate	no
XRN2	0	0	0.00227516	lysate	no
MANBAL	0	0	#N/A	#N/A	#N/A
RPRD1B	0	0	0.0201739	lysate	no
FAM83D	0	0	0.179664	lysate	no
PTS	0	0.329187	-0.0649599	lysate	no
CSE1L	0	0	-0.0757793	lysate	no
C20orf11	0	0	#N/A	#N/A	#N/A
SRXN1	0	0	-0.0420571	lysate	no
FKBP1A,SDCBP2	0	0	#N/A	#N/A	#N/A
C20orf30	0	0	#N/A	#N/A	#N/A
KIF16B	0	0	-0.112099	lysate	no
RBBP9	0	0	-0.140177	lysate	no
PLAGL2	0	0	#N/A	#N/A	#N/A
NECAB3	0	0	#N/A	#N/A	#N/A
LOC647979	0	0	#N/A	#N/A	#N/A
DSN1	0	0	-0.0552934	lysate	no
RBL1	0	0	-0.347444	lysate	no
SLC13A3,TP53RK	0	0	#N/A	#N/A	#N/A
AURKA	0	0	0.0439779	lysate	no
HRH3	0	0	#N/A	#N/A	#N/A
MIR3648	0	0	#N/A	#N/A	#N/A
CXADR	0	0	0.00227516	lysate	no
GABPA	0	0	-0.081819	lysate	no
IFNAR2,IL10RB	0	0	#N/A	#N/A	#N/A
SON	0	0	-0.516678	exosome	no
HSPA13	0	0	-0.0012652	lysate	no
C21orf91	0	0	#N/A	#N/A	#N/A
LTN1	0	0	-0.0576919	lysate	no
TMEM50B	0	0	#N/A	#N/A	#N/A
RCAN1	0	0	0.0082459	lysate	no
NCRNA00257	0	0	#N/A	#N/A	#N/A
U2AF1	0	0	0.112489	lysate	no
CDC45	0	0	-0.0854853	lysate	no
COMT	0	0	0.0499183	lysate	no
RNF185	0	0	#N/A	#N/A	#N/A
PDXP	0	0	-0.0854853	lysate	no
RBX1	0	0	-0.246099	exosome	no
MPPED1	0	0	#N/A	#N/A	#N/A
ATXN10	0	0	-0.0794363	lysate	no
TRMU	0	0	-0.0456593	lysate	no
MAPK8IP2	0	0	#N/A	#N/A	#N/A
RTN4R	0	0	#N/A	#N/A	#N/A
YDJC	0	0	#N/A	#N/A	#N/A
TPST2	0	0	#N/A	#N/A	#N/A
UQCR10	0	0	-0.0661064	lysate	no
TST	0	0	-0.127983	lysate	no
CYP2D6	0	0	#N/A	#N/A	#N/A
SCUBE1	0	0	#N/A	#N/A	#N/A
TATDN2	0	0	0.403274	exosome	no
PPARG	0	0	#N/A	#N/A	#N/A
TBC1D5	0	0	-0.0156646	lysate	no
LOC645206	0	0	#N/A	#N/A	#N/A
EXOSC7	0	0	-0.0360573	lysate	no
KCTD6	0	0	#N/A	#N/A	#N/A
KBTBD8	0	0	0.26145	lysate	no
LOC201617,RYBP	0	0	#N/A	#N/A	#N/A
PCNP	0	0	-0.163174	lysate	no
SLC35A5	0	0	#N/A	#N/A	#N/A
ATP6V1A	0	0	-0.087864	lysate	no
C3orf15	0	0	#N/A	#N/A	#N/A
FAM162A	0	0	-0.0276479	lysate	no
UMPS	0	0	0.0142121	lysate	no
PLXNA1	0	0	-0.0348255	lysate	no
SEC61A1	0	0	0.0261314	lysate	no
C3orf58	0	0	-0.173092	lysate	no
RNF13	0	0	-0.106032	lysate	no
SELT	0	0	#N/A	#N/A	#N/A
GFM1	0	0	-0.0216539	lysate	no
MFSD1	0	0	#N/A	#N/A	#N/A
MYNN	0	0	#N/A	#N/A	#N/A
GPR160	0	0	#N/A	#N/A	#N/A
ECT2	0	0	0.0142121	lysate	no
ZNF639	0	0	#N/A	#N/A	#N/A
MFN1	0	0	0.109106	lysate	no
ACTL6A	0	0	-0.0576919	lysate	no
ATP11B	0	0	0.0795601	lysate	no
LOC100505687	0	0	#N/A	#N/A	#N/A
SENP2	0	0	#N/A	#N/A	#N/A
CCDC50	0	0	0.061787	lysate	no
ARL8B	0	0	-0.0216539	lysate	no
LHFPL4	0	0	#N/A	#N/A	#N/A
HACL1	0	0	0.0082459	lysate	no
SGOL1	0	0	#N/A	#N/A	#N/A
NGLY1	0	0	0.0201739	lysate	no
OSBPL10	0	0	0.0201739	lysate	no
CLASP2	0	0	-0.0276479	lysate	no
TRANK1	0	0	#N/A	#N/A	#N/A
OXSR1	0	0	-0.0975995	lysate	no
ULK4	0	0	#N/A	#N/A	#N/A
HIGD1A	0	0	-0.217028	lysate	no
SLC25A20	0	0	0.0261314	lysate	no
RHOA	0	0	0.028587	lysate	no
BAP1	0	0	-0.140177	lysate	no
SEMA3G	0	0	#N/A	#N/A	#N/A
ARF4	0	0	0.0736396	lysate	no
FAM116A	0	0	#N/A	#N/A	#N/A
CPOX	0	0	-0.118172	lysate	no
SENP7	0	0	#N/A	#N/A	#N/A
ZBTB11	0	0	-0.0697449	lysate	no
TXNRD3,TXNRD3NB	0	0	#N/A	#N/A	#N/A
GK5	0	0	#N/A	#N/A	#N/A
ATR	0	0	-0.0962854	lysate	no
HLTF	0	0	0.0795601	lysate	no
PFN2	0	0	-0.0576919	lysate	no
DHX36	0	0	-0.00370013	lysate	no
KPNA4	0	0	0.061787	lysate	no
EIF5A2	0	0	#N/A	#N/A	#N/A
GNB4	0	0	-0.240281	exosome	no
MRPL47	0	0	-0.118172	lysate	no
DCUN1D1	0	0	-0.00968002	lysate	no
UBXN7	0	0	-0.142521	lysate	no
NCBP2	0	0	0.0711543	lysate	no
MYL5	0	0	#N/A	#N/A	#N/A
LAP3	0	0	-0.0276479	lysate	no
PI4K2B	0	0	-0.0613213	lysate	no
TMEM33	0	0	0.156196	lysate	no
TMEM165	0	0	-0.0721315	lysate	no
DCK	0	0	-0.12425	lysate	no
CXCL6	0	0	#N/A	#N/A	#N/A
COPS4	0	0	-0.0240725	lysate	no
SMARCAD1	0	0	-0.136425	lysate	no
SEC24B	0	0	-0.0276479	lysate	no
GAR1	0	0	0.354385	lysate	no
METTL14	0	0	-0.00370013	lysate	no
PLK4	0	0	#N/A	#N/A	#N/A
IL15	0	0	#N/A	#N/A	#N/A
ABCE1	0	0	0.0380333	lysate	no
GUCY1B3	0	0	-0.0156646	lysate	no
C4orf43	0	0	#N/A	#N/A	#N/A
SC4MOL	0	0	#N/A	#N/A	#N/A
GALNT7	0	0	0.0439779	lysate	no
SPCS3	0	0	0.0913895	lysate	no
SNX25	0	0	#N/A	#N/A	#N/A
FBXL5	0	0	#N/A	#N/A	#N/A
RPL9	0	0	-0.136425	lysate	no
C4orf34	0	0	#N/A	#N/A	#N/A
ATP8A1,BEND4	0	0	#N/A	#N/A	#N/A
RCHY1	0	0	#N/A	#N/A	#N/A
SDAD1	0	0	-0.0180872	lysate	no
NUP54	0	0	-0.0240725	lysate	no
HNRNPD	0	0	0.203084	lysate	no
PIGY	0	0	#N/A	#N/A	#N/A
GPRIN3	0	0	#N/A	#N/A	#N/A
SLC39A8	0	0	#N/A	#N/A	#N/A
SCLT1	0	0	0.120078	lysate	no
C4orf49	0	0	#N/A	#N/A	#N/A
NDUFC1	0	0	0.152868	lysate	no
PRMT10	0	0	#N/A	#N/A	#N/A
LRBA	0	0	-0.0854853	lysate	no
MAP9	0	0	0.0736396	lysate	no
PDGFC	0	0	-0.0115416	exosome	no
C4orf46	0	0	-0.116167	lysate	no
CBR4	0	0	-0.164637	lysate	no
ACSL1	0	0	-0.0192312	lysate	no
KIAA1430	0	0	#N/A	#N/A	#N/A
SRD5A1	0	0	#N/A	#N/A	#N/A
ROPN1L	0	0	#N/A	#N/A	#N/A
C5orf22	0	0	-0.0576919	lysate	no
GHR	0	0	#N/A	#N/A	#N/A
ITGA2	0	0	-0.0697449	lysate	no
IPO11,LRRC70	0	0	#N/A	#N/A	#N/A
ERBB2IP	0	0	#N/A	#N/A	#N/A
SLC30A5	0	0	-0.0216539	lysate	no
TNPO1	0	0	0.0082459	lysate	no
HMGCR	0	0	0.223223	lysate	no
F2RL1	0	0	#N/A	#N/A	#N/A
SCAMP1	0	0	0.0261314	lysate	no
JMY	0	0	-0.0902388	lysate	no
RASA1	0	0	-0.0276479	lysate	no
LOC100505894	0	0	#N/A	#N/A	#N/A
GPR98	0	0	#N/A	#N/A	#N/A
LNPEP	0	0	-0.0975995	lysate	no
RIOK2	0	0	-0.112099	lysate	no
FAM174A	0	0	#N/A	#N/A	#N/A
C5orf30	0	0	0.132678	lysate	no
WDR36	0	0	0.156196	lysate	no
APC	0	0	-0.0468641	lysate	no
DCP2	0	0	0.167936	lysate	no
LYRM7	0	0	-0.0156646	lysate	no
CDC42SE2	0	0	0.0320845	lysate	no
UBE2B	0	0	-0.0952247	lysate	no
SEC24A	0	0	-0.112099	lysate	no
FAM53C	0	0	-0.0637158	lysate	no
REEP2	0	0	-0.284514	lysate	no
RNF14	0	0	-0.0420571	lysate	no
FBXO38	0	0	-0.0661064	lysate	no
SLC26A2	0	0	-0.00481426	lysate	no
SOCS6	0	0	0.38334	lysate	yes
CNOT8	0	0	-0.0516731	lysate	no
CCNG1	0	0	#N/A	#N/A	#N/A
MAT2B	0	0	-0.0156646	lysate	no
RANBP17	0	0	-0.0939145	lysate	no
NPM1	0	0	0.208933	lysate	no
NSUN2	0	0	-0.0456593	lysate	no
FASTKD3	0	0	-0.0913104	lysate	no
AGXT2	0	0	#N/A	#N/A	#N/A
NUP155	0	0	-0.0216539	lysate	no
LIFR	0	0	#N/A	#N/A	#N/A
RICTOR	0	0	-0.0252293	lysate	no
EMB	0	0	0.0320845	lysate	no
ARL15	0	0	-0.0156646	lysate	no
DHX29	0	0	0.0201739	lysate	no
DEPDC1B	0	0	0.0499183	lysate	no
ELOVL7	0	0	0.141906	lysate	no
AP3B1	0	0	-0.0757793	lysate	no
FAM172A	0	0	-0.0962854	lysate	no
RIOK2	0	0	-0.112099	lysate	no
PJA2	0	0	0.0345443	lysate	no
DTWD2	0	0	-0.0168045	lysate	no
HINT1	0	0	-0.0312322	lysate	no
RAPGEF6	0	0	0.0474501	lysate	no
KIF3A	0	0	-0.0216539	lysate	no
ZCCHC10	0	0	-0.0805407	lysate	no
C5orf15	0	0	-0.0216539	lysate	no
CDKN2AIPNL	0	0	-0.0480618	lysate	no
SAR1B	0	0	-0.00968002	lysate	no
GNPDA1	0	0	-0.0576919	lysate	no
LARS	0	0	-0.120527	lysate	no
CSNK1A1	0	0	-0.0456593	lysate	no
GEMIN5	0	0	-0.00968002	lysate	no
CLINT1	0	0	0.128485	lysate	no
RNF145	0	0	#N/A	#N/A	#N/A
C5orf54,CCNJL	0	0	#N/A	#N/A	#N/A
FBXW11	0	0	0.307978	lysate	no
DUSP1	0	0	#N/A	#N/A	#N/A
NKX2-5	0	0	#N/A	#N/A	#N/A
KIAA1191	0	0	0.00337192	lysate	no
RNF130	0	0	#N/A	#N/A	#N/A
WRNIP1	0	0	-0.0637158	lysate	no
TMEM170B	0	0	#N/A	#N/A	#N/A
RNF182	0	0	#N/A	#N/A	#N/A
FAM8A1	0	0	#N/A	#N/A	#N/A
MRS2	0	0	0.0226254	lysate	no
HIST1H4C	0	0	#N/A	#N/A	#N/A
SRSF3	0	0	0.0820539	lysate	no
KIAA0240,UBR2	0	0	#N/A	#N/A	#N/A
KLHDC3	0	0	-0.087864	lysate	no
TMEM63B	0	0	#N/A	#N/A	#N/A
ENPP4	0	0	0.0166595	lysate	no
FAM83B	0	0	0.131852	lysate	no
PRIM2	0	0	-0.118172	lysate	no
C6orf57	0	0	#N/A	#N/A	#N/A
MTO1	0	0	-0.181543	lysate	no
TGFB1	0	0	0.38334	lysate	yes
SNHG5	0	0	#N/A	#N/A	#N/A
LIN28B	0	0	0.0736396	lysate	no
VGLL2	0	0	#N/A	#N/A	#N/A
SLC35F1	0	0	#N/A	#N/A	#N/A
PKIB	0	0	-0.0516731	lysate	no
HINT3	0	0	-0.142521	lysate	no
PERP	0	0	#N/A	#N/A	#N/A
PHACTR2	0	0	0.0271773	lysate	no
C6orf211	0	0	0.0519426	exosome	no
RPP40	0	0	-0.00968002	lysate	no
DEK,TPMT	0	0	#N/A	#N/A	#N/A
TDP2	0	0	0.0972986	lysate	no
LOC100270746	0	0	#N/A	#N/A	#N/A
HLA-C	0	0	-0.19151	lysate	no
ZBTB12	0	0	#N/A	#N/A	#N/A
HLA-DOB	0	0	#N/A	#N/A	#N/A
DAXX	0	0	-0.179225	lysate	no
LEMD2	0	0	0.0439779	lysate	no
CD44	0	0	0.380287	lysate	yes
ETV7	0	0	#N/A	#N/A	#N/A
FOXP4	0	0	-0.0721315	lysate	no
ICK	0	0	#N/A	#N/A	#N/A
GCLC	0	0	-0.00370013	lysate	no
TMEM30A	0	0	0.0296288	lysate	no
ELOVL4	0	0	0.0345443	lysate	no
IBTK	0	0	-0.253336	lysate	no
ME1	0	0	-0.0420571	lysate	no
MANEA	0	0	-0.068493	lysate	no
CCNC	0	0	-0.0492706	lysate	no
ASCC3,SIM1	0	0	#N/A	#N/A	#N/A
HACE1	0	0	#N/A	#N/A	#N/A
ZBTB24	0	0	#N/A	#N/A	#N/A
SERINC1	0	0	-0.150959	lysate	no
EPB41L2	0	0	0.132678	lysate	no
BCLAF1,MAP7	0	0	#N/A	#N/A	#N/A
IFNGR1	0	0	-0.278264	lysate	no
PPIL4	0	0	-0.0276479	lysate	no
TCP1	0	0	-0.0637158	lysate	no
PDE10A	0	0	#N/A	#N/A	#N/A
BRP44L	0	0	#N/A	#N/A	#N/A
PHF10	0	0	-0.0240725	lysate	no
AHR	0	0	0.287385	lysate	no
RAVER2	0	0	0.377876	lysate	yes
YKT6	0	0	-0.0216539	lysate	no
PPIA	0	0	-0.0637158	lysate	no
MRPS17	0	0	#N/A	#N/A	#N/A
INTS4L1	0	0	#N/A	#N/A	#N/A
C7orf42	0	0	#N/A	#N/A	#N/A
WBSCR22	0	0	-0.0180872	lysate	no
RSBN1L	0	0	0.0711543	lysate	no
GNG11	0	0	#N/A	#N/A	#N/A
ACN9	0	0	#N/A	#N/A	#N/A
NPTX2	0	0	-0.0540716	lysate	no
GNB2	0	0	-0.00968002	lysate	no
PRKAR2B	0	0	-0.19151	lysate	no
CBLL1	0	0	-0.0649599	lysate	no
ZNF277	0	0	0.16538	lysate	no
LOC407835	0	0	#N/A	#N/A	#N/A
MKLN1	0	0	0.0499183	lysate	no
NUP205	0	0	-0.0902388	lysate	no
C7orf29	0	0	#N/A	#N/A	#N/A
REPIN1	0	0	0.141906	lysate	no
LOC100505483	0	0	#N/A	#N/A	#N/A
INSIG1	0	0	#N/A	#N/A	#N/A
UBE3C	0	0	-0.0492706	lysate	no
ZNF12	0	0	#N/A	#N/A	#N/A
C7orf28B	0	0	#N/A	#N/A	#N/A
RPA3	0	0	-0.0156646	lysate	no
OSBPL3	0	0	0.0533822	lysate	no
SKAP2	0	0	#N/A	#N/A	#N/A
PSMA2	0	0	-0.087864	lysate	no
C7orf44	0	0	#N/A	#N/A	#N/A
IGF2BP2	0	0	0.371763	lysate	yes
PURB	0	0	0.0288549	exosome	no
PKD1L1	0	0	#N/A	#N/A	#N/A
TBL2	0	0	-0.0156646	lysate	no
C7orf23	0	0	#N/A	#N/A	#N/A
CYP51A1	0	0	-0.0396506	lysate	no
FAM133B	0	0	-0.19651	exosome	no
CDK6	0	0	0.0888914	lysate	no
ACN9	0	0	#N/A	#N/A	#N/A
GIGYF1	0	0	-0.189196	lysate	no
PUS7	0	0	-0.0939145	lysate	no
C7orf74	0	0	#N/A	#N/A	#N/A
COG5	0	0	-0.0396506	lysate	no
PNPLA8	0	0	0.0464462	lysate	no
THAP5	0	0	#N/A	#N/A	#N/A
C7orf60	0	0	#N/A	#N/A	#N/A
CADPS2,RNF148	0	0	#N/A	#N/A	#N/A
NDUFA5	0	0	-0.0999704	lysate	no
POT1	0	0	0.0499183	lysate	no
SLC37A3	0	0	#N/A	#N/A	#N/A
ZNF425	0	0	-0.0132378	lysate	no
NCAPG2	0	0	-0.120527	lysate	no
MCPH1	0	0	#N/A	#N/A	#N/A
FAM160B2	0	0	0.0380333	lysate	no
SLC39A14	0	0	-0.0540716	lysate	no
DDHD2	0	0	-0.106032	lysate	no
AGPAT6	0	0	#N/A	#N/A	#N/A
AP3M2	0	0	-0.183047	lysate	no
HOOK3	0	0	0.0320845	lysate	no
RRS1	0	0	0.354385	lysate	no
E2F5	0	0	-0.0697449	lysate	no
OTUD6B	0	0	0.0177266	lysate	no
TMEM67	0	0	0.146189	lysate	no
PDP1	0	0	0.0820539	lysate	no
SDC2	0	0	#N/A	#N/A	#N/A
POLR2K	0	0	#N/A	#N/A	#N/A
MAL2	0	0	#N/A	#N/A	#N/A
WDYHV1	0	0	#N/A	#N/A	#N/A
FAM91A1	0	0	-0.0480618	lysate	no
C8orf55	0	0	#N/A	#N/A	#N/A
LY6E	0	0	#N/A	#N/A	#N/A
MTUS1	0	0	0.124266	lysate	no
PLCD3	0	0	0.363252	lysate	yes
RB1CC1	0	0	-0.00259059	lysate	no
TCEA1	0	0	-0.0661064	lysate	no
IMPAD1	0	0	0.0736396	lysate	no
CHD7,RAB2A	0	0	#N/A	#N/A	#N/A
GGH	0	0	-0.0216539	lysate	no
CYP7B1	0	0	0.0509139	lysate	no
MYBL1	0	0	#N/A	#N/A	#N/A
COPS5	0	0	-0.0939145	lysate	no
ARFGEF1	0	0	0.0201739	lysate	no
LACTB2	0	0	-0.12425	lysate	no
MRPS28	0	0	-0.0999704	lysate	no
SNX16	0	0	#N/A	#N/A	#N/A
TMEM64	0	0	#N/A	#N/A	#N/A
RAD54B	0	0	-0.0576919	lysate	no
HRSP12	0	0	-0.292127	exosome	no
RRM2B	0	0	-0.207684	lysate	no
KLF10	0	0	#N/A	#N/A	#N/A
LOC100499183	0	0	#N/A	#N/A	#N/A
RAD21	0	0	0	exosome	no
SAMD12	0	0	#N/A	#N/A	#N/A
DERL1	0	0	0.0947961	lysate	no
TMEM65	0	0	-0.00370013	lysate	no
FAM49B	0	0	-0.0999704	lysate	no
PLEC	0	0	0.120899	lysate	no
ACER2	0	0	#N/A	#N/A	#N/A
DNAJA1	0	0	-0.00370013	lysate	no
UNC13B	0	0	-0.081819	lysate	no
TRPM6	0	0	#N/A	#N/A	#N/A
OSTF1	0	0	-0.0276479	lysate	no
PSAT1	0	0	-0.0697449	lysate	no
CTSL1	0	0	#N/A	#N/A	#N/A
HIATL1	0	0	#N/A	#N/A	#N/A
NANS	0	0	0.0142121	lysate	no
GALNT12	0	0	#N/A	#N/A	#N/A
COL15A1	0	0	0.277853	exosome	no
TGFBR1	0	0	#N/A	#N/A	#N/A
SEC61B	0	0	0.00580685	lysate	no
NIPSNAP3A,NIPSNAP3B	0	0	#N/A	#N/A	#N/A
FKTN	0	0	-0.169291	lysate	no
TMEM38B	0	0	0.0142121	lysate	no
DNAJC25,DNAJC25-GNG10,GNG10	0	0	#N/A	#N/A	#N/A
LOC100288842	0	0	#N/A	#N/A	#N/A
FPGS	0	0	0.0464462	lysate	no
SLC27A4	0	0	-0.0156646	lysate	no
SET	0	0	0.169432	lysate	no
USP20	0	0	0.214778	lysate	no
ABL1	0	0	-0.0432528	lysate	no
C9orf172	0	0	#N/A	#N/A	#N/A
SSNA1	0	0	-0.144861	lysate	no
NDOR1	0	0	0.0261314	lysate	no
LOC554202	0	0	#N/A	#N/A	#N/A
SMU1	0	0	0.0082459	lysate	no
NOL6	0	0	0.103204	lysate	no
STOML2	0	0	0.0320845	lysate	no
KLF9	0	0	#N/A	#N/A	#N/A
GNAQ	0	0	0.0736396	lysate	no
AGTPBP1	0	0	-0.00370013	lysate	no
FANCC	0	0	#N/A	#N/A	#N/A
CDC14B	0	0	#N/A	#N/A	#N/A
ERP44	0	0	0.0261314	lysate	no
SCAI	0	0	-0.0999704	lysate	no
PPP6C	0	0	0.0261314	lysate	no
RPL12	0	0	-0.0456593	lysate	no
TOR1A	0	0	0.0404973	lysate	no
C9orf78	0	0	-0.00968002	lysate	no
FAM78A	0	0	#N/A	#N/A	#N/A
SURF6	0	0	0.0795601	lysate	no
SDCCAG3	0	0	0.162829	lysate	no
SEC16A	0	0	-0.173332	exosome	no
SNHG7,SNORA17,SNORA43	0	0	#N/A	#N/A	#N/A
FBXW5	0	0	#N/A	#N/A	#N/A
TMEM203,TPRN	0	0	#N/A	#N/A	#N/A
NRARP	0	0	#N/A	#N/A	#N/A
FAM9B	0	0	#N/A	#N/A	#N/A
CABLES1	0	0	-0.385595	lysate	yes
MBTPS2	0	0	#N/A	#N/A	#N/A
PRDX4	0	0	0.0320845	lysate	no
ATP6AP2	0	0	0.093892	lysate	no
CCDC120	0	0	#N/A	#N/A	#N/A
MAGIX,PLP2	0	0	#N/A	#N/A	#N/A
MAGED2	0	0	-0.081819	lysate	no
APEX2,PAGE2	0	0	#N/A	#N/A	#N/A
UBQLN2	0	0	-0.0733927	lysate	no
FAAH2	0	0	#N/A	#N/A	#N/A
ZXDB	0	0	#N/A	#N/A	#N/A
ITGB1BP2,NONO	0	0	#N/A	#N/A	#N/A
SH3BGRL	0	0	-0.0661064	lysate	no
ARMCX5,ARMCX5-GPRASP2,GPRASP1,GPRASP2	0	0	#N/A	#N/A	#N/A
NXT2	0	0	0.0602851	lysate	no
LRCH2	0	0	0.0439779	lysate	no
PGRMC1	0	0	0.0913895	lysate	no
ZBTB33	0	0	0.0142121	lysate	no
MCTS1	0	0	0.00227516	lysate	no
MTM1	0	0	-0.0432528	lysate	no
VMA21	0	0	0.290545	lysate	no
DUSP9	0	0	-0.290772	lysate	no
ABCD1	0	0	#N/A	#N/A	#N/A
TMEM187	0	0	#N/A	#N/A	#N/A
KAL1	0	0	-0.604167	exosome	no
POU3F2	0	0	-0.406979	lysate	yes
EIF1AX	0	0	-0.0216539	lysate	no
RPGR	0	0	0	exosome	no
FAM171A2	0	0	-0.411204	lysate	yes
GNL3L	0	0	0.0439779	lysate	no
MSN,VSIG4	0	0	#N/A	#N/A	#N/A
ABCB7	0	0	0.0261314	lysate	no
MAGT1	0	0	-0.0576919	lysate	no
BRWD3	0	0	#N/A	#N/A	#N/A
CHM	0	0	0.103204	lysate	no
TSPAN6	0	0	0.1411	lysate	no
PSMD10	0	0	-0.0999704	lysate	no
AMMECR1	0	0	-0.00148564	lysate	no
PLS3	0	0	0.197234	lysate	no
KLHL13	0	0	-0.0192312	lysate	no
NKRF	0	0	-0.0336468	lysate	no
FTH1	0	-0.391564	-0.411204	lysate	yes
ZNF280C	0	0	#N/A	#N/A	#N/A
HS6ST2	0	0	0.144444	lysate	no
FAM122B	0	0	-0.0989192	lysate	no
MOSPD1	0	0	#N/A	#N/A	#N/A
MMGT1	0	0	0.061787	lysate	no
RBMX	0	0	0.342793	lysate	no
HCFC1	0	0	0.0686734	lysate	no
FANCB	0	0	-0.417628	lysate	yes
RBM3	0	0.326112	0.28473	lysate	no
LYPD1	0	0.347532	#N/A	#N/A	#N/A
RPS20	0	0.428831	-0.0396506	lysate	no
ACCS	0	0.453744	#N/A	#N/A	#N/A
CITED2	0	0.483697	#N/A	#N/A	#N/A
IRS4	0	0	-0.443419	lysate	yes
RHBDF1	0	0.640932	#N/A	#N/A	#N/A
WTIP	0	0.651756	#N/A	#N/A	#N/A
RAPGEF3	0	0.669621	#N/A	#N/A	#N/A
DNAJC15	0	0.72542	#N/A	#N/A	#N/A
FSTL3	0	0.737269	#N/A	#N/A	#N/A
PLXNA2	0	0	-0.443419	lysate	yes
HSPB8	0	0.895842	0.296358	lysate	no
TNNC1	0	1.0271	#N/A	#N/A	#N/A
ACTBL2	0	1.04064	0.0593102	lysate	no
LOC645638	0	1.07298	#N/A	#N/A	#N/A
MIR221	0	1.26646	#N/A	#N/A	#N/A
OR6C6	0	1.35753	#N/A	#N/A	#N/A
CCL2	0	1.53485	#N/A	#N/A	#N/A
MYOF	0	1.56915	#N/A	#N/A	#N/A
COL12A1	0	1.61683	0.184918	exosome	no
ARHGAP40	0	1.69111	#N/A	#N/A	#N/A
KRT80	0	1.83224	#N/A	#N/A	#N/A
SYP	0	-0.389395	-0.44989	lysate	yes
LOC100507351	0	2.00437	#N/A	#N/A	#N/A
ASH1L	0	2.62928	0.0439779	lysate	no
BOLA1	0	0	-0.0999704	lysate	no
DISP1	0	0	#N/A	#N/A	#N/A
ATHL1	0	0	#N/A	#N/A	#N/A
EFCAB4A	0	0	#N/A	#N/A	#N/A
HARBI1	0	0	#N/A	#N/A	#N/A
TMPRSS5	0	0	#N/A	#N/A	#N/A
TROAP	0	0	0.0558547	lysate	no
HOXC12	0	0	#N/A	#N/A	#N/A
SLC26A10	0	0	#N/A	#N/A	#N/A
IFFO1	0	0	0.173061	lysate	no
POMP	0	0	-0.0336468	lysate	no
C14orf128	0	0	#N/A	#N/A	#N/A
RAPGEFL1	0	0	#N/A	#N/A	#N/A
TUBG2	0	0	#N/A	#N/A	#N/A
AZU1	0	0	#N/A	#N/A	#N/A
C19orf79	0	0	#N/A	#N/A	#N/A
SULT2A1	0	0	#N/A	#N/A	#N/A
LOC729723	0	0	#N/A	#N/A	#N/A
NCRNA00152	0	0	#N/A	#N/A	#N/A
ZAP70	0	0	#N/A	#N/A	#N/A
RPL31	0	0	-0.087864	lysate	no
LOC100288911	0	0	#N/A	#N/A	#N/A
LOC150197	0	0	#N/A	#N/A	#N/A
VIPR1	0	0	#N/A	#N/A	#N/A
TMEM42	0	0	#N/A	#N/A	#N/A
CCDC167	0	0	-0.278799	lysate	no
NDUFA4	0	0	-0.154731	lysate	no
SAP25	0	0	#N/A	#N/A	#N/A
MIRLET7D,ZNF169	0	0	#N/A	#N/A	#N/A
MRPL41	0	0	-0.154731	lysate	no
GPR174,ITM2A	0	0	#N/A	#N/A	#N/A
MGC16121,MIR424,MIR503	0	0	#N/A	#N/A	#N/A
RPL21	0	-0.837868	-0.127983	lysate	no
FGF22	0	200	#N/A	#N/A	#N/A
LOC100128076	0	2.19509	#N/A	#N/A	#N/A
SOX1	0	2.11092	#N/A	#N/A	#N/A
ANXA2P2	0	1.88344	#N/A	#N/A	#N/A
PKD1L2	0	1.8064	#N/A	#N/A	#N/A
PNLIPRP2	0	1.66608	#N/A	#N/A	#N/A
NBPF14	0	1.50864	#N/A	#N/A	#N/A
ATXN3L	0	1.45942	#N/A	#N/A	#N/A
NTF3	0	1.40335	#N/A	#N/A	#N/A
GATSL2	0	1.37141	0.0380333	lysate	no
NTF4	0	1.32346	#N/A	#N/A	#N/A
B3GALT5	0	1.30319	#N/A	#N/A	#N/A
ACRBP	0	1.26047	#N/A	#N/A	#N/A
SLC25A34	0	1.14518	#N/A	#N/A	#N/A
SYT5	0	1.14233	#N/A	#N/A	#N/A
TTC3P1	0	1.05511	#N/A	#N/A	#N/A
LOC100131655	0	0.985299	#N/A	#N/A	#N/A
PRR22	0	0.971774	#N/A	#N/A	#N/A
COL5A3	0	0.959197	#N/A	#N/A	#N/A
SCML1	0	0	-0.462855	lysate	yes
EMILIN1	0	0.899254	#N/A	#N/A	#N/A
GNN	0	0.898691	#N/A	#N/A	#N/A
LOC100505875	0	0.896238	#N/A	#N/A	#N/A
HESX1	0	0.886269	#N/A	#N/A	#N/A
ANKRD7	0	0.863978	#N/A	#N/A	#N/A
NHLH1	0	0.846599	#N/A	#N/A	#N/A
NUAK2	0	0.841643	#N/A	#N/A	#N/A
ZNF700	0	0.836323	#N/A	#N/A	#N/A
NTNG1	0	0.81156	#N/A	#N/A	#N/A
FAM7A3	0	0.807563	#N/A	#N/A	#N/A
CASC1	0	0.806653	#N/A	#N/A	#N/A
IRS1	0	0.792698	#N/A	#N/A	#N/A
SEPT7L	0	0.778518	#N/A	#N/A	#N/A
IL10RA	0	0.762289	#N/A	#N/A	#N/A
ADAMTSL5	0	0.758221	#N/A	#N/A	#N/A
IFITM3	0	0.757292	#N/A	#N/A	#N/A
NDST4	0	0.734691	#N/A	#N/A	#N/A
SNAPC1	0	0.717125	0.208933	lysate	no
KCNIP2	0	0.709187	#N/A	#N/A	#N/A
LOC100133545	0	0.691431	#N/A	#N/A	#N/A
ALOXE3	0	0.67775	#N/A	#N/A	#N/A
GLIS3	0	0.673418	#N/A	#N/A	#N/A
SMOC2	0	0.667143	#N/A	#N/A	#N/A
SLC7A8	0	0.666221	#N/A	#N/A	#N/A
FAM113B	0	0.651382	#N/A	#N/A	#N/A
C9orf163	0	0.612604	#N/A	#N/A	#N/A
LOC100289019	0	0.599467	#N/A	#N/A	#N/A
C16orf46	0	0.596171	#N/A	#N/A	#N/A
WDR16	0	0.585521	#N/A	#N/A	#N/A
MIR125A,NCRNA00085	0	0.581983	#N/A	#N/A	#N/A
RASSF9	0	0.57383	#N/A	#N/A	#N/A
PQLC3	0	0.573046	#N/A	#N/A	#N/A
ENTPD2	0	0.565577	#N/A	#N/A	#N/A
LOC400752	0	0.558999	#N/A	#N/A	#N/A
CAMKK1	0	0	-0.469362	lysate	yes
TTC14	0	0.529541	-0.259557	lysate	no
USP43	0	0.515778	#N/A	#N/A	#N/A
MITF	0	0.49834	#N/A	#N/A	#N/A
EPHA10	0	0.498025	#N/A	#N/A	#N/A
LOC642846	0	0.494411	#N/A	#N/A	#N/A
ZNF335	0	0.493408	#N/A	#N/A	#N/A
ZNF121	0	0.493323	#N/A	#N/A	#N/A
C11orf9	0	0.491832	#N/A	#N/A	#N/A
SMAD6	0	0.489669	#N/A	#N/A	#N/A
FLJ10661	0	0.48946	#N/A	#N/A	#N/A
FILIP1	0	0.487806	#N/A	#N/A	#N/A
KC6	0	0.486523	#N/A	#N/A	#N/A
LOC100505648	0	0.484186	#N/A	#N/A	#N/A
TMEM178	0	0.465657	#N/A	#N/A	#N/A
CLDN1	0	0.465609	#N/A	#N/A	#N/A
PROM1	0	0.46411	#N/A	#N/A	#N/A
SLC35D2	0	0.460795	#N/A	#N/A	#N/A
GOLGA8A,GOLGA8B	0	0.46008	#N/A	#N/A	#N/A
MAOA	0	0.456833	0.293699	lysate	no
NUAK1	0	0.447698	#N/A	#N/A	#N/A
KCND1	0	0.443352	#N/A	#N/A	#N/A
LRRK2	0	0.439925	#N/A	#N/A	#N/A
GCNT2	0	0.434918	#N/A	#N/A	#N/A
RBMS3	0	0.431605	#N/A	#N/A	#N/A
IMPACT	0	0.428573	-0.0156646	lysate	no
IQGAP3	0	0.427698	-0.0121068	lysate	no
KDM4D	0	0.426223	#N/A	#N/A	#N/A
SYCP2	0	0.417749	#N/A	#N/A	#N/A
SAP30L	0	0	-0.469362	lysate	yes
ZNF185	0	0.412832	#N/A	#N/A	#N/A
GPR126	0	0.40563	-0.236659	exosome	no
ZNF846	0	0.405596	#N/A	#N/A	#N/A
EFEMP1	0	0.40321	-0.513172	exosome	no
ZNF20,ZNF625	0	0.387752	#N/A	#N/A	#N/A
PDCD5	0	0.386689	-0.112099	lysate	no
SERPINB1	0	0.380842	0.0736396	lysate	no
AMT,NICN1	0	0.374447	#N/A	#N/A	#N/A
SVEP1	0	0.369875	#N/A	#N/A	#N/A
SORL1	0	0.36579	0.0177266	lysate	no
NXN	0	0.329246	0.313785	lysate	no
CALD1	0	0.323943	0.299504	lysate	no
LOC729059	0	-200	#N/A	#N/A	#N/A
NEU4	0	-200	#N/A	#N/A	#N/A
RPS2	0	-0.347856	-0.087864	lysate	no
RPL18A	0	-0.370206	-0.288516	lysate	no
SHC2	0	-0.379029	#N/A	#N/A	#N/A
TOM1	0	-0.393682	-0.144861	lysate	no
DDIT4	0	-0.394602	#N/A	#N/A	#N/A
EYA1	0	-0.402328	#N/A	#N/A	#N/A
NOSIP	0	-0.406713	0.0913895	lysate	no
TCEAL3	0	-0.427139	-0.295337	exosome	no
TRIM21	0	-0.445641	0.120049	lysate	no
NDUFS6	0	-0.451429	-0.181543	lysate	no
KLHL25	0	-0.476652	#N/A	#N/A	#N/A
LIN37	0	-0.530281	#N/A	#N/A	#N/A
GDAP1L1	0	-0.532772	#N/A	#N/A	#N/A
CCDC124	0	-0.567747	-0.0841977	lysate	no
TPPP3	0	-0.585816	-0.179225	lysate	no
EGR2	0	-0.664313	#N/A	#N/A	#N/A
AMBN	0	-0.712339	#N/A	#N/A	#N/A
ZBTB7C	0	-0.712586	#N/A	#N/A	#N/A
BST2	0	-0.76065	#N/A	#N/A	#N/A
FONG	0	-0.767563	#N/A	#N/A	#N/A
TMEM86A	0	-0.901626	#N/A	#N/A	#N/A
GRM4	0	-0.942847	#N/A	#N/A	#N/A
CD82	0	-0.976612	#N/A	#N/A	#N/A
ENTPD6	0	-0.977003	#N/A	#N/A	#N/A
FABP5	0	-0.990261	-0.0697449	lysate	no
STMN4	0	-1.05136	#N/A	#N/A	#N/A
FAM164C	0	-1.06933	#N/A	#N/A	#N/A
LOC650368	0	-1.3117	#N/A	#N/A	#N/A
NAT8L	0	-2.25418	-0.265785	lysate	no
PARK2	0	-3.18027	#N/A	#N/A	#N/A
CACHD1	0	0	-0.0576919	lysate	no
TXNIP	0	0	#N/A	#N/A	#N/A
IL6R	0	0	#N/A	#N/A	#N/A
IRF2BP2	0	0	-0.0697449	lysate	no
ESPNP	0	0	#N/A	#N/A	#N/A
TCEA3	0	0	#N/A	#N/A	#N/A
NKAIN1	0	0	#N/A	#N/A	#N/A
PYROXD2	0	0	#N/A	#N/A	#N/A
PTTG1	0	0	-0.534921	lysate	yes
YPEL4	0	0	#N/A	#N/A	#N/A
C12orf60	0	0	#N/A	#N/A	#N/A
LRP1	0	0	-0.187678	lysate	no
NUDT4	0	0	0.0320845	lysate	no
BHLHE41	0	0	#N/A	#N/A	#N/A
TM7SF3	0	0	-0.161717	lysate	no
PLEKHA8P1	0	0	#N/A	#N/A	#N/A
MTUS2	0	0	#N/A	#N/A	#N/A
COL4A2	0	0	-0.106032	lysate	no
PGF	0	0	#N/A	#N/A	#N/A
ADAMTS18	0	0	#N/A	#N/A	#N/A
KDM6B	0	0	-0.0420571	lysate	no
TMEM100	0	0	#N/A	#N/A	#N/A
NOG	0	0	#N/A	#N/A	#N/A
SDK2	0	0	-0.173092	lysate	no
NOTUM	0	0	#N/A	#N/A	#N/A
EMILIN2	0	0	#N/A	#N/A	#N/A
SS18	0	0	0.120899	lysate	no
ZCCHC2	0	0	#N/A	#N/A	#N/A
C19orf38	0	0	#N/A	#N/A	#N/A
MAST3	0	0	#N/A	#N/A	#N/A
TNFAIP3	0	0	-0.554795	lysate	yes
DYSF	0	0	#N/A	#N/A	#N/A
HK2	0	0	0.0261314	lysate	no
KDM3A	0	0	-0.118172	lysate	no
DHRS9	0	0	#N/A	#N/A	#N/A
SNORD89	0	0	#N/A	#N/A	#N/A
MCFD2	0	0	-0.747497	lysate	yes
KIF1A	0	0	-0.0516731	lysate	no
PTGIS	0	0	#N/A	#N/A	#N/A
ATP9A	0	0	0.0201739	lysate	no
PRIC285	0	0	#N/A	#N/A	#N/A
KIAA0930	0	0	0.0106891	lysate	no
ITPR1	0	0	0.0082459	lysate	no
TIPARP	0	0	#N/A	#N/A	#N/A
ADAMTS9	0	0	#N/A	#N/A	#N/A
CPEB2	0	0	#N/A	#N/A	#N/A
FBLL1	0	0	0.208933	lysate	no
FN1	0	0	-0.774019	exosome	yes
MMADHC	0	0	-0.823267	lysate	yes
STC2	0	0	-0.836341	exosome	yes
FOXO3	0	0	-0.265785	lysate	no
SHFM1	0	-0.409681	-0.939865	lysate	yes
RSPH3	0	0	#N/A	#N/A	#N/A
CLDN4	0	0	#N/A	#N/A	#N/A
PLXNA4	0	0	#N/A	#N/A	#N/A
STC1	0	0	#N/A	#N/A	#N/A
EBF2	0	0	#N/A	#N/A	#N/A
TMEM74	0	0	#N/A	#N/A	#N/A
NDRG1	0	0	-0.334794	lysate	no
SPIN4	0	0	#N/A	#N/A	#N/A
ARHGEF6	0	0	-0.104701	lysate	no
MUC1	0	-0.575945	#N/A	#N/A	#N/A
COL13A1	0	-0.539518	#N/A	#N/A	#N/A
C11orf96	0	-0.531944	-0.177731	lysate	no
ELMOD1	0	-0.528899	#N/A	#N/A	#N/A
INPP5D	0	-0.525402	#N/A	#N/A	#N/A
MAFB	0	-0.44362	#N/A	#N/A	#N/A
TNFRSF11A	0	-0.407391	#N/A	#N/A	#N/A
PVRL4	0	-0.404312	#N/A	#N/A	#N/A
MEX3B	0	-0.359697	#N/A	#N/A	#N/A
UBE4B	0	0	-0.0697449	lysate	no
APITD1,APITD1-CORT,CORT	0	0	#N/A	#N/A	#N/A
FAM43B	0	0	#N/A	#N/A	#N/A
ZNF593	0	0	0.0888914	lysate	no
PHACTR4	0	0	0.192081	lysate	no
EIF3I	0	0	-0.0697449	lysate	no
DMAP1	0	0	0.0972986	lysate	no
NEXN	0	0	#N/A	#N/A	#N/A
LMO4	0	0	#N/A	#N/A	#N/A
ATXN7L2	0	0	#N/A	#N/A	#N/A
EFNA3	0	0	#N/A	#N/A	#N/A
PHYH	0	0	-0.947299	lysate	yes
LMNA	0	0	0.19138	lysate	no
HSD17B7	0	0	-0.0336468	lysate	no
FAM163A	0	0	#N/A	#N/A	#N/A
RGS2	0	0	#N/A	#N/A	#N/A
MOSC2	0	0	#N/A	#N/A	#N/A
ARF1	0	0	-0.0939145	lysate	no
ENO1	0	0	-0.112099	lysate	no
DHRS3	0	0	-0.234716	lysate	no
LTBP4	0	0	-1.16993	exosome	yes
CAPZB	0	0	-0.0216539	lysate	no
CAMK2N1	0	0	#N/A	#N/A	#N/A
BSDC1,LOC100128071	0	0	#N/A	#N/A	#N/A
PSMB2	0	0	-0.0794363	lysate	no
EIF2B3,PTCH2	0	0	#N/A	#N/A	#N/A
GSTM3	0	0	0.0345443	lysate	no
PPM1J	0	0	#N/A	#N/A	#N/A
BCAS2	0	0	-0.0516731	lysate	no
TPM3	0	0	0.162068	lysate	no
DPM3	0	0	-0.0216539	lysate	no
CRABP2,ISG20L2	0	0	#N/A	#N/A	#N/A
TAGLN2	0	0	0.061787	lysate	no
COPA	0	0	-0.0637158	lysate	no
ARHGAP30	0	0	#N/A	#N/A	#N/A
C1orf35	0	0	-0.0480618	lysate	no
HIST3H2A	0	0	#N/A	#N/A	#N/A
PFKP	0	0	0.0142121	lysate	no
OPTN	0	0	0.0201739	lysate	no
MSRB2	0	0	-0.154731	lysate	no
NRBF2	0	0	0.0201739	lysate	no
PLAU	0	0	#N/A	#N/A	#N/A
DPCD	0	0	-0.160845	lysate	no
SLC18A2	0	0	#N/A	#N/A	#N/A
BAG3	0	0	0.0972986	lysate	no
PPP2R2D	0	0	-0.142521	lysate	no
PITRM1	0	0	-0.130335	lysate	no
DNAJC1	0	0	0.168686	lysate	no
ARMC4	0	0	#N/A	#N/A	#N/A
NRP1	0	0	-0.223936	lysate	no
ANXA11	0	0	-0.0252293	lysate	no
NDUFB8	0	0	-0.142521	lysate	no
LDB1	0	0	-0.0348255	lysate	no
NUCB2	0	0	-0.0999704	lysate	no
C11orf46	0	0	#N/A	#N/A	#N/A
FEN1	0	0	-0.0637158	lysate	no
NUDT22	0	0	#N/A	#N/A	#N/A
ARL2,SNX15	0	0	#N/A	#N/A	#N/A
DPF2	0	0	-0.078162	lysate	no
NDUFV1	0	0	-0.199969	lysate	no
ALDH3B1	0	0	#N/A	#N/A	#N/A
ATG16L2	0	0	#N/A	#N/A	#N/A
RELT	0	0	#N/A	#N/A	#N/A
POLD3	0	0	-0.173092	lysate	no
NCAM1	0	0	0.0320845	lysate	no
EI24	0	0	-0.12425	lysate	no
PDDC1	0	0	-0.185364	lysate	no
STK33	0	0	0.0355734	lysate	no
RPS13	0	0	-0.0854853	lysate	no
PAMR1	0	0	#N/A	#N/A	#N/A
CHST1	0	0	#N/A	#N/A	#N/A
CFL1,DKFZp761E198	0	0	#N/A	#N/A	#N/A
FOSL1	0	0	#N/A	#N/A	#N/A
RPS25	0	0	-0.0396506	lysate	no
THYN1	0	0	-0.00613095	lysate	no
FKBP4	0	0	-0.103665	lysate	no
COPS7A	0	0	-0.0576919	lysate	no
TPI1	0	0	-0.087864	lysate	no
FGFR1OP2	0	0	-0.142521	lysate	no
DNAJC22	0	0	#N/A	#N/A	#N/A
METTL7A	0	0	-0.222338	lysate	no
PFDN5	0	0	0.132678	lysate	no
AMHR2	0	0	#N/A	#N/A	#N/A
SUOX	0	0	-0.240916	lysate	no
ALX1	0	0	#N/A	#N/A	#N/A
ERP29	0	0	-0.00968002	lysate	no
PEBP1	0	0	-0.197662	lysate	no
CSDA	0	0	#N/A	#N/A	#N/A
GALNT6	0	0	-0.176904	lysate	no
ATP5G2	0	0	-0.136425	lysate	no
CSRP2	0	0	0.249797	lysate	no
CCDC59	0	0	0.0913895	lysate	no
NDUFA12	0	0	-0.181543	lysate	no
FOXN4	0	0	#N/A	#N/A	#N/A
MMAB	0	0	-0.126602	lysate	no
RPL6	0	0	-0.0516731	lysate	no
RPLP0	0	0	-0.0492706	lysate	no
C12orf43	0	0	0.162068	lysate	no
ANKLE2	0	0	0.00227516	lysate	no
ZIC2	0	0	0.0355734	lysate	no
ING1	0	0	0.0533822	lysate	no
TSC22D1	0	0	-0.115813	lysate	no
ZC3H13	0	0	-0.0300625	lysate	no
PARP2	0	0	0.0558547	lysate	no
MMP14,MRPL52	0	0	#N/A	#N/A	#N/A
NPAS3	0	0	#N/A	#N/A	#N/A
NRXN3	0	0	#N/A	#N/A	#N/A
WDR25	0	0	#N/A	#N/A	#N/A
ADSSL1	0	0	#N/A	#N/A	#N/A
ZFHX2	0	0	#N/A	#N/A	#N/A
PSME2	0	0	0.138605	exosome	no
ZFP36L1	0	0	#N/A	#N/A	#N/A
ACTN1	0	0	0.310652	lysate	no
C14orf1	0	0	#N/A	#N/A	#N/A
TGFB3	0	0	#N/A	#N/A	#N/A
CKMT1A	0	0	-0.140177	lysate	no
EID1	0	0	#N/A	#N/A	#N/A
MAP2K5	0	0	-0.0939145	lysate	no
CLK3	0	0	0.0499183	lysate	no
SLCO3A1	0	0	#N/A	#N/A	#N/A
PCOLCE2	0	0	-1.20454	exosome	yes
PARP16	0	0	-0.00370013	lysate	no
IGDCC3	0	0	#N/A	#N/A	#N/A
CIB2	0	0	#N/A	#N/A	#N/A
NOMO3	0	0	#N/A	#N/A	#N/A
POLR3E	0	0	-0.0975995	lysate	no
CDH3	0	0	#N/A	#N/A	#N/A
MTSS1L	0	0	0.226461	lysate	no
KIAA0174	0	0	#N/A	#N/A	#N/A
DHODH	0	0	-0.0396506	lysate	no
ZNRF1	0	0	#N/A	#N/A	#N/A
CMIP	0	0	-0.142521	lysate	no
ROGDI	0	0	-0.160845	lysate	no
NSMCE1	0	0	0.179664	lysate	no
YPEL3	0	0	#N/A	#N/A	#N/A
ZNF689	0	0	#N/A	#N/A	#N/A
FAM192A	0	0	0.092298	lysate	no
NDRG4	0	0	-0.0468641	lysate	no
TK2	0	0	#N/A	#N/A	#N/A
LOC729513	0	0	#N/A	#N/A	#N/A
CFDP1	0	0	-0.169291	lysate	no
CNTROB	0	0	#N/A	#N/A	#N/A
TMEM11	0	0	-0.00968002	lysate	no
NSRP1	0	0	-0.471588	exosome	no
MLX	0	0	-0.219334	lysate	no
RND2	0	0	#N/A	#N/A	#N/A
CRHR1	0	0	#N/A	#N/A	#N/A
TACO1	0	0	-0.087864	lysate	no
RGS9	0	0	#N/A	#N/A	#N/A
LOC440461	0	0	#N/A	#N/A	#N/A
SLC9A3R1	0	0	-0.182203	exosome	no
CCDC40	0	0	#N/A	#N/A	#N/A
CCDC137	0	0	0.28473	lysate	no
FN3K	0	0	#N/A	#N/A	#N/A
ATP2A3	0	0	#N/A	#N/A	#N/A
PFN1	0	0	-0.118172	lysate	no
TRAPPC1	0	0	-0.0962854	lysate	no
HES7	0	0	#N/A	#N/A	#N/A
VAMP2	0	0	-0.0216539	lysate	no
RPL26	0	0	-0.0999704	lysate	no
NOS2	0	0	#N/A	#N/A	#N/A
C17orf63	0	0	#N/A	#N/A	#N/A
SLFN13	0	0	#N/A	#N/A	#N/A
RPL23	0	0	-0.148623	lysate	no
C17orf37	0	0	#N/A	#N/A	#N/A
KRT16,KRT17	0	0	#N/A	#N/A	#N/A
NT5C3L	0	0	#N/A	#N/A	#N/A
RAB5C	0	0	-0.0396506	lysate	no
42982	0	0	#N/A	#N/A	#N/A
GNAL	0	0	#N/A	#N/A	#N/A
LOC284233	0	0	#N/A	#N/A	#N/A
LOC339298	0	0	#N/A	#N/A	#N/A
KCTD1	0	0	-0.223936	lysate	no
NOL4	0	0	-0.160845	lysate	no
CCDC11	0	0	#N/A	#N/A	#N/A
EFNA1	0	0	-1.27982	exosome	yes
ATP5D	0	0	-0.00968002	lysate	no
MIDN	0	0	#N/A	#N/A	#N/A
MRPL54	0	0	-0.127983	lysate	no
TNFAIP8L1	0	0	#N/A	#N/A	#N/A
RPL36	0	0	-0.0336468	lysate	no
VAV1	0	0	#N/A	#N/A	#N/A
UBL5	0	0	-0.197662	lysate	no
PRKCSH	0	0	0.0296288	lysate	no
RAD23A	0	0	-0.0613213	lysate	no
IL27RA	0	0	#N/A	#N/A	#N/A
TPM4	0	0	-0.0661064	lysate	no
FAM32A	0	0	-0.0673544	lysate	no
NDUFA13,YJEFN3	0	0	#N/A	#N/A	#N/A
ZNF101	0	0	#N/A	#N/A	#N/A
VSTM2B	0	0	#N/A	#N/A	#N/A
FXYD1	0	0	#N/A	#N/A	#N/A
FXYD5	0	0	#N/A	#N/A	#N/A
PSMD8	0	0	-0.00968002	lysate	no
PLAT	0	0	-1.31991	exosome	yes
HNRNPUL1	0	0	0.313785	lysate	no
PRR24	0	0	#N/A	#N/A	#N/A
FLT3LG	0	0	#N/A	#N/A	#N/A
RPS11	0	0	-0.0721315	lysate	no
CNOT3	0	0	-0.0516731	lysate	no
TSEN34	0	0	-0.0613213	lysate	no
ZNF580	0	0	#N/A	#N/A	#N/A
UQCR11	0	0	0.167936	lysate	no
AES	0	0	-0.211446	lysate	no
C19orf10	0	0	-0.184918	exosome	no
KHSRP	0	0	-0.0336468	lysate	no
OLFM2	0	0	#N/A	#N/A	#N/A
KRI1	0	0	0.167936	lysate	no
KANK2	0	0	0.0320845	lysate	no
EPOR	0	0	#N/A	#N/A	#N/A
STX10	0	0	-0.0372401	lysate	no
PRKACA	0	0	-0.087864	lysate	no
MED26	0	0	#N/A	#N/A	#N/A
LGI4	0	0	#N/A	#N/A	#N/A
ZNF428	0	0	-0.0115416	exosome	no
CCDC8	0	0	0.0947961	lysate	no
SLC8A2	0	0	#N/A	#N/A	#N/A
IL4I1,NUP62	0	0	#N/A	#N/A	#N/A
ETFB	0	0	-0.112099	lysate	no
MAPRE3	0	0	-0.112099	lysate	no
LOC100129726,THADA,ZFP36L2	0	0	#N/A	#N/A	#N/A
FLJ30838	0	0	#N/A	#N/A	#N/A
APLF	0	0	#N/A	#N/A	#N/A
CNNM4	0	0	0.0166595	lysate	no
MAP4K4	0	0	-0.0516731	lysate	no
NCK2	0	0	-0.0384638	lysate	no
TMEM37	0	0	#N/A	#N/A	#N/A
RPRM	0	0	#N/A	#N/A	#N/A
KBTBD10	0	0	#N/A	#N/A	#N/A
HOXD13	0	0	#N/A	#N/A	#N/A
INPP1	0	0	-0.0673544	lysate	no
RPL37A	0	0	-0.130335	lysate	no
PTMA	0	0	-0.21391	exosome	no
FAM150B	0	0	#N/A	#N/A	#N/A
SLC30A3	0	0	#N/A	#N/A	#N/A
BOLA3	0	0	-0.0216539	lysate	no
LOC654342	0	0	#N/A	#N/A	#N/A
FAHD2B,FAM178B	0	0	#N/A	#N/A	#N/A
EN1	0	0	#N/A	#N/A	#N/A
DARS	0	0	-0.0276479	lysate	no
CIR1	0	0	0.0795601	lysate	no
PSMF1	0	0	-0.081819	lysate	no
DTD1	0	0	-0.0661064	lysate	no
FRG1B	0	0	#N/A	#N/A	#N/A
DYNLRB1	0	0	-0.0915397	lysate	no
DLGAP4	0	0	-0.0216539	lysate	no
PFDN4	0	0	0.0464462	lysate	no
GTPBP5	0	0	#N/A	#N/A	#N/A
C20orf20	0	0	#N/A	#N/A	#N/A
SLC2A4RG	0	0	#N/A	#N/A	#N/A
C20orf46	0	0	#N/A	#N/A	#N/A
ZNF343	0	0	#N/A	#N/A	#N/A
RRBP1	0	0	0.150321	lysate	no
LOC284801	0	0	#N/A	#N/A	#N/A
GSS	0	0	-0.160845	lysate	no
ZMYND8	0	0	-0.102337	lysate	no
CHRNA4	0	0	#N/A	#N/A	#N/A
KCNQ2	0	0	#N/A	#N/A	#N/A
SOD1	0	0	-0.0999704	lysate	no
NDUFV3	0	0	-0.0757793	lysate	no
C21orf58	0	0	#N/A	#N/A	#N/A
MRPL40	0	0	-0.106032	lysate	no
HSCB	0	0	-0.0240725	lysate	no
UQCR10	0	0	-0.0661064	lysate	no
MTFP1	0	0	-0.089161	lysate	no
DGCR6L	0	0	#N/A	#N/A	#N/A
TOP3B	0	0	-0.0276479	lysate	no
DDT	0	0	-0.12425	lysate	no
NIPSNAP1	0	0	-0.187678	lysate	no
RAC2	0	0	#N/A	#N/A	#N/A
CSNK1E	0	0	0.0261314	lysate	no
ZNF197	0	0	#N/A	#N/A	#N/A
PARP3	0	0	#N/A	#N/A	#N/A
PXK	0	0	0.0523908	lysate	no
LOC100507032	0	0	#N/A	#N/A	#N/A
YEATS2	0	0	-0.0336468	lysate	no
RPL35A	0	0	-0.087864	lysate	no
SRGAP3	0	0	#N/A	#N/A	#N/A
SEC13	0	0	0.00580685	lysate	no
LRRFIP2	0	0	0.232299	lysate	no
TMEM158	0	0	#N/A	#N/A	#N/A
ITIH4	0	0	0.327778	exosome	no
THOC7	0	0	0.0261314	lysate	no
IFT57	0	0	-0.0721315	lysate	no
MFAP2	0	0	-1.44227	exosome	yes
PLSCR1	0	0	#N/A	#N/A	#N/A
BCL6	0	0	#N/A	#N/A	#N/A
TMEM44	0	0	#N/A	#N/A	#N/A
SH3BP2	0	0	#N/A	#N/A	#N/A
LIAS	0	0	#N/A	#N/A	#N/A
RPL34	0	0	0.0320845	lysate	no
ING2	0	0	#N/A	#N/A	#N/A
SLC25A4	0	0	0.00227516	lysate	no
FRG1	0	0	-0.00370013	lysate	no
WHSC2	0	0	#N/A	#N/A	#N/A
FBXW7	0	0	#N/A	#N/A	#N/A
DCHS2	0	0	#N/A	#N/A	#N/A
NDUFS4	0	0	-0.173092	lysate	no
NDUFAF2	0	0	-0.0432528	lysate	no
BTF3	0	0	-0.00968002	lysate	no
LMNB1	0	0	-0.0396506	lysate	no
RAD50	0	0	0.0261314	lysate	no
EGR1	0	0	#N/A	#N/A	#N/A
CTNNA1	0	0	0.176366	lysate	no
TCOF1	0	0	-0.087864	lysate	no
NFKBIA	0	-0.340303	#N/A	#N/A	#N/A
CCDC99	0	0	#N/A	#N/A	#N/A
TMED9	0	0	0.0711543	lysate	no
BTNL9	0	0	#N/A	#N/A	#N/A
PRKAA1,RPL37,TTC33	0	0	#N/A	#N/A	#N/A
P4HA2	0	0	0.0593102	lysate	no
IRF1	0	0	#N/A	#N/A	#N/A
SPRY4	0	0	#N/A	#N/A	#N/A
RPS14	0	0	-0.081819	lysate	no
RBM22	0	0	0.0854767	lysate	no
STK10	0	0	0.0854767	lysate	no
THOC3	0	0	-0.0456593	lysate	no
CLTB	0	0	0.179664	lysate	no
SNCB	0	0	-0.276543	lysate	no
LMAN2	0	0	-0.154731	lysate	no
FOXQ1	0	0	#N/A	#N/A	#N/A
NQO2	0	0	0.00689499	lysate	no
PRSS16	0	0	#N/A	#N/A	#N/A
HSD17B8	0	0	-0.140177	lysate	no
SNRPC	0	0	0.135211	lysate	no
RPL10A	0	0	-0.106032	lysate	no
FOXP4	0	0	-0.0721315	lysate	no
C6orf141	0	0	#N/A	#N/A	#N/A
FLJ46906	0	0	#N/A	#N/A	#N/A
GTF2H5	0	0	-0.109736	lysate	no
MRPL2	0	0	-0.130335	lysate	no
PLA2G7	0	0	0.35378	exosome	no
HMGN3	0	0	-0.658839	exosome	no
PERP	0	0	#N/A	#N/A	#N/A
ELFN1	0	0	#N/A	#N/A	#N/A
WIPI2	0	0	-0.081819	lysate	no
SCIN	0	0	0.331195	lysate	no
MRPL32	0	0	-0.109736	lysate	no
STAG3L4	0	0	#N/A	#N/A	#N/A
GNGT1	0	0	#N/A	#N/A	#N/A
MEPCE	0	0	-0.0276479	lysate	no
POP7	0	0	-0.081819	lysate	no
PMPCB	0	0	-0.081819	lysate	no
PSMC2	0	0	-0.0336468	lysate	no
ARF5,FSCN3	0	0	#N/A	#N/A	#N/A
LOC100128822	0	0	#N/A	#N/A	#N/A
XRCC2	0	0	#N/A	#N/A	#N/A
LOC202781	0	0	#N/A	#N/A	#N/A
PSMG3	0	0	-0.109736	lysate	no
ANKMY2	0	0	-0.0661064	lysate	no
EPDR1	0	0	0.0082459	lysate	no
CAMK2B	0	0	-0.106032	lysate	no
GUSB	0	0	-0.0336468	lysate	no
TMEM60	0	0	#N/A	#N/A	#N/A
POLR2J3	0	0	#N/A	#N/A	#N/A
CTTNBP2	0	0	0.144444	lysate	no
AKR1B1	0	0	-0.142521	lysate	no
MYOM2	0	0	#N/A	#N/A	#N/A
GATA4	0	0	0.103204	lysate	no
SLC25A37	0	0	#N/A	#N/A	#N/A
NDUFB9	0	0	-0.0794363	lysate	no
FAM86B1	0	0	#N/A	#N/A	#N/A
CLU	0	0	0.276269	lysate	no
FGFR1	0	0	-0.248758	exosome	no
GEM	0	0	#N/A	#N/A	#N/A
RPL30	0	0	-0.0336468	lysate	no
NRBP2	0	0	#N/A	#N/A	#N/A
VPS28	0	0	-0.0180872	lysate	no
RPL8,ZNF34	0	0	#N/A	#N/A	#N/A
CCDC107	0	0	#N/A	#N/A	#N/A
CLTA	0	0	-0.0012652	lysate	no
CNTNAP3B	0	0	#N/A	#N/A	#N/A
SWI5	0	0	#N/A	#N/A	#N/A
ODF2	0	0	0.0499183	lysate	no
NCRNA00094	0	0	#N/A	#N/A	#N/A
MAMDC4,PHPT1	0	0	#N/A	#N/A	#N/A
C9orf123	0	0	#N/A	#N/A	#N/A
TPM2	0	0	-0.0132378	lysate	no
GOLGA2	0	0	0.0593102	lysate	no
C9orf50	0	0	#N/A	#N/A	#N/A
LOC100289341	0	0	#N/A	#N/A	#N/A
LOC100129722	0	0	#N/A	#N/A	#N/A
TMSB4X	0	0	#N/A	#N/A	#N/A
RBM10	0	0	0.0082459	lysate	no
EBP	0	0	#N/A	#N/A	#N/A
TCEAL4	0	0	-0.0600864	lysate	no
GLUD2	0	0	#N/A	#N/A	#N/A
CNGA2	0	0	#N/A	#N/A	#N/A
RPL10	0	0	-0.197662	lysate	no
FUNDC2	0	0	0.0913895	lysate	no
SH3KBP1	0	0	0.111621	lysate	no
DMD	0	0	0.0261314	lysate	no
GPKOW	0	0	0.0854767	lysate	no
HSD17B10	0	0	-0.112099	lysate	no
ITM2A	0	0	#N/A	#N/A	#N/A
42984	0	0	-0.0637158	lysate	no
NKAP	0	0	-0.118172	lysate	no
MAP7D3	0	0	0.115004	lysate	no
PNMA6D	0	0	#N/A	#N/A	#N/A
MTCP1,MTCP1NB	0	0	#N/A	#N/A	#N/A
RAP1GAP	0	-0.36418	#N/A	#N/A	#N/A
NRGN	0	-0.481938	-0.272021	lysate	no
NOTCH3	0	0	-1.56197	exosome	yes
RPS26	0	-0.357094	-0.0999704	lysate	no
SNRPF	0	-0.395049	0.00117385	lysate	no
PSMC1	0	-0.965563	-0.0156646	lysate	no
EVL	0	-0.400851	0.0533822	lysate	no
EIF3C,EIF3CL	0	-1.00472	#N/A	#N/A	#N/A
HSD11B2	0	-0.634992	#N/A	#N/A	#N/A
INCA1	0	-0.594475	#N/A	#N/A	#N/A
RPL19	0	-0.427537	-0.112099	lysate	no
RPRML	0	-0.70342	#N/A	#N/A	#N/A
RPS28	0	-0.47479	-0.0902388	lysate	no
ARHGEF1,RPS19	0	-0.356594	#N/A	#N/A	#N/A
POLR2I	0	-0.486284	-0.0865725	lysate	no
TMSB10	0	-0.409303	0.0634888	exosome	no
JAKMIP1	0	-0.653192	#N/A	#N/A	#N/A
PDLIM3	0	-0.377487	-0.121895	lysate	no
RPS12	0	-0.337982	-0.0312322	lysate	no
UPP1	0	-0.56813	#N/A	#N/A	#N/A
SEMA6A	0	0	-1.58496	exosome	yes
RPL35	0	-0.37507	-0.0240725	lysate	no
EDF1	0	-0.342579	-0.0180872	lysate	no
JUN	0	-0.355223	0.211525	lysate	no
YWHAB	0	0	-0.142521	lysate	no
USP11	0	0	-0.0540716	lysate	no
SUMO2	0	0	-0.136425	lysate	no
CDT1	0	0	-0.175414	lysate	no
TKT	0	0	-0.118172	lysate	no
ZNF777	0	0	#N/A	#N/A	#N/A
CXCR4	0	0	#N/A	#N/A	#N/A
MYO5B	0	0	0.220621	lysate	no
RINL	0	0	-0.081819	lysate	no
MAPT	0	0	-0.19151	lysate	no
HIP1	0	0	0.00227516	lysate	no
ATP1B2	0	0	0.0558547	lysate	no
WIPF3	0	0	-0.010807	lysate	no
UHRF1	0	0	0.290545	lysate	no
AARS2	0	0	-0.112099	lysate	no
DPF1	0	0	0.111621	lysate	no
KIF1C	0	0	0.106595	lysate	no
[truncated: 70 more rows]
